# Supplementary material for: Nanovesicles loaded with a TGF-β receptor 1 inhibitor overcome immune resistance to potentiate cancer immunotherapy
Source: PubMed Central journal article supplement (PMC10275881; doi:10.1038/s41467-023-39035-x), 2023-06-16
Supplement: 41467_2023_39035_MOESM1_ESM.pdf [file 41467_2023_39035_MOESM1_ESM.pdf]

# Supplementary Information for

## **Nanovesicles loaded with a TGF- $\beta$ receptor 1 inhibitor overcome immune resistance to potentiate cancer immunotherapy**

Mengxue Zhou<sup>1,†</sup>, Jiabin Wang<sup>1,2,†</sup>, Jiaying Pan<sup>1,†</sup>, Hui Wang<sup>2,†</sup>, Lujia Huang<sup>1</sup>, Bo Hou<sup>1</sup>, Yi Lai<sup>1</sup>,  
Fengyang Wang<sup>3</sup>, Qingxiang Guan<sup>4</sup>, Feng Wang<sup>5</sup>, Zhiai Xu<sup>6</sup>, Haijun Yu<sup>1,\*</sup>

<sup>1</sup> Center of Pharmaceutics, Shanghai Institute of Materia Medica, Chinese Academy of Sciences, Shanghai 201203, China;

<sup>2</sup> College of Chemistry and Chemical Engineering, Inner Mongolia University, Huhhot, 010021, China;

<sup>3</sup> Shanghai Tenth People's Hospital, Tongji University School of Medicine, Shanghai 200072, China;

<sup>4</sup> School of Pharmacy, Jilin University, Changchun, 130021, China;

<sup>5</sup> Department of Gastroenterology, Huadong Hospital, Shanghai Medical College, Fudan University, Shanghai 200040, China;

<sup>6</sup> School of Chemistry and Molecular Engineering, East China Normal University, Shanghai 200241, China.

[\*] Corresponding authors:

Prof. H. Yu (hjyu@simm.ac.cn), Center of Pharmaceutics, Shanghai Institute of Materia Medica, Chinese Academy of Sciences, Shanghai 201203, China.

† These authors contributed equally to this work.

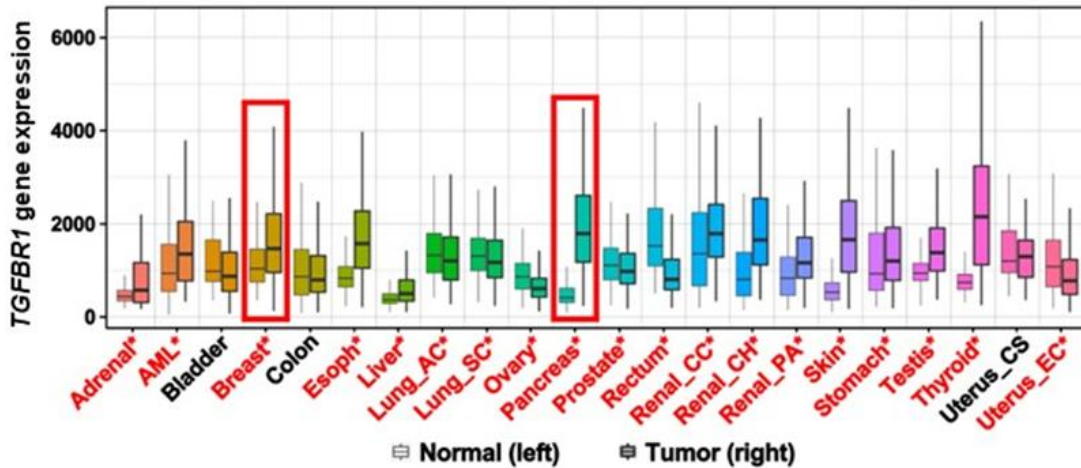

21  
 22 **Supplementary Figure 1.** *TGFBR1* gene expression in different normal and tumor tissues (n = 15648 normal,  
 23 40442 tumor samples). Significant differences by a two-sided Mann–Whitney U test are marked with red color (\*  
 24  $p < 0.01$ ). Plot was downloaded from the online database TNMplot (<https://tnmplot.com/analysis/>). Boxplot  
 25 represents the median, interquartile range, upper whisker, maximum and minimum. Copyright ©: Department of  
 26 Bioinformatics, Semmelweis University 2021-2023<sup>2</sup>.

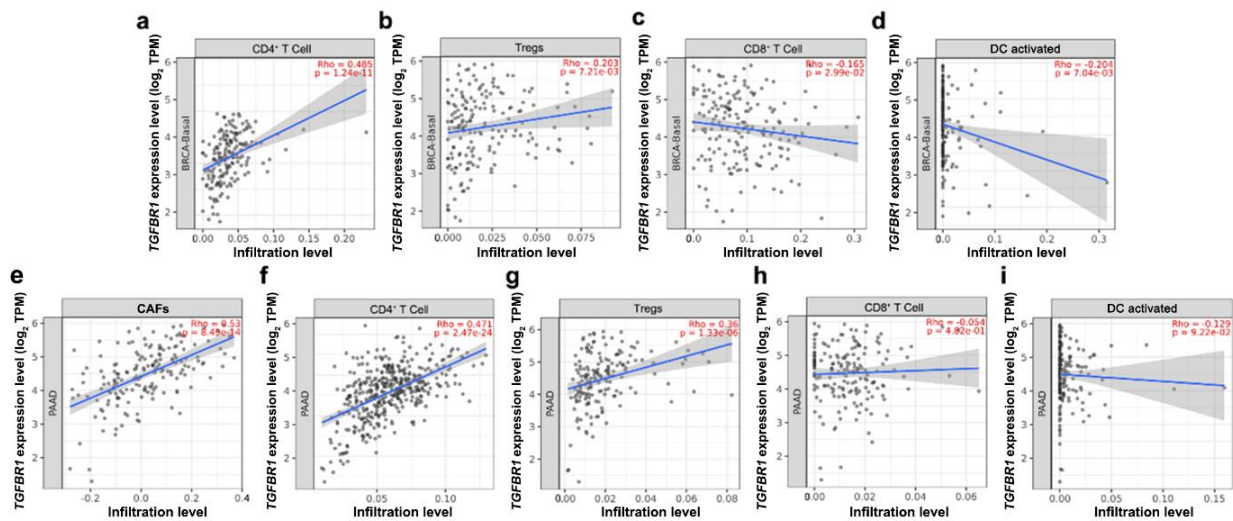

28  
 29 **Supplementary Figure 2.** Correlation between *TGFBR1* expression with survival and immune cell  
 30 infiltration level in the TIMER database. (a-d) The correlation between *TGFBR1* expression and intratumoral  
 31 infiltration level of (a) CD4<sup>+</sup> T cells, (b) Tregs, (c) CD8<sup>+</sup> T cells, and (d) myeloid DC activated in breast invasive  
 32 carcinoma (BRCA-Basal) patients (n=191). (e-i) The correlation between *TGFBR1* expression and intratumoral  
 33 infiltration level of (e) cancer-associated fibroblasts (CAFs), (f) CD4<sup>+</sup> T cell, (g) Tregs, (h) CD8<sup>+</sup> T cell, and (i)  
 34 myeloid DC activated in pancreatic adenocarcinoma patients (n=179). Shaded error bands depict the standard error.  
 35 Spearman test was used to determine the correlation coefficients.

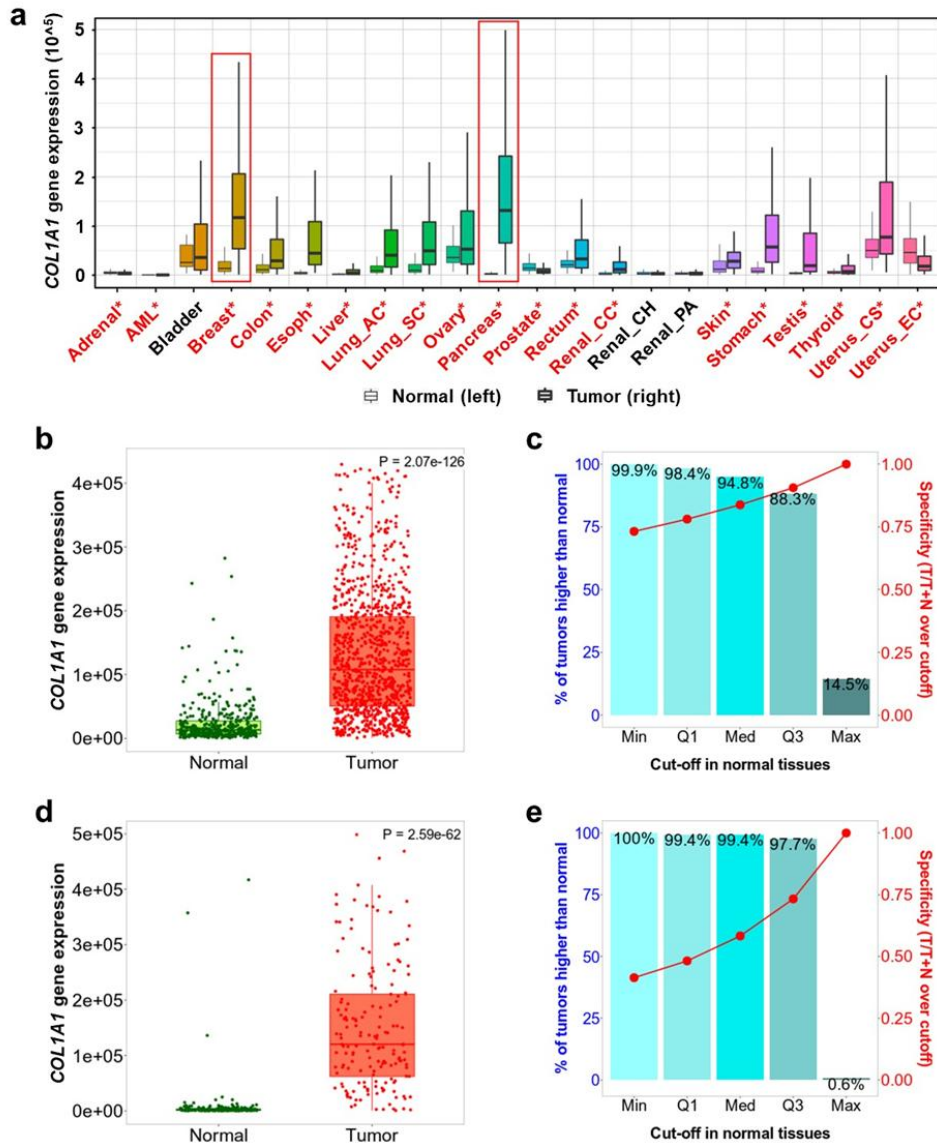

36

37 **Supplementary Figure 3. COL1A1 gene expression in normal and tumor tissues.** (a) COL1A1 gene expression  
 38 in different normal and tumor tissues (n = 15648 normal, 40442 tumor samples). Significant differences by a  
 39 two-sided Mann–Whitney U test are marked with red color (\*  $p < 0.01$ ). Plot was downloaded from the online  
 40 database TNMplot (<https://tnmplot.com/analysis/>). Boxplot represents the median, interquartile range, upper  
 41 whisker, maximum and minimum. Copyright ©: Department of Bioinformatics, Semmelweis University  
 42 2021-2023<sup>2</sup>. (b and c) COL1A1 gene expression profiles of breast invasive carcinoma tissues (n = 1097 patients)  
 43 with normal breast tissues (n = 403 patients). (d and e) COL1A1 gene expression profiles of pancreatic  
 44 adenocarcinoma tissues (n = 177 patients) with normal pancreatic tissues (n = 252 patients). The bars in b, d  
 45 represent the proportions of tumor samples that show higher expression of the selected gene compared to normal  
 46 samples at each of the quantile cutoff values (minimum, 1st quartile, median, 3rd quartile, maximum). P values in b,  
 47 d derived from the Mann–Whitney test comparison between groups.

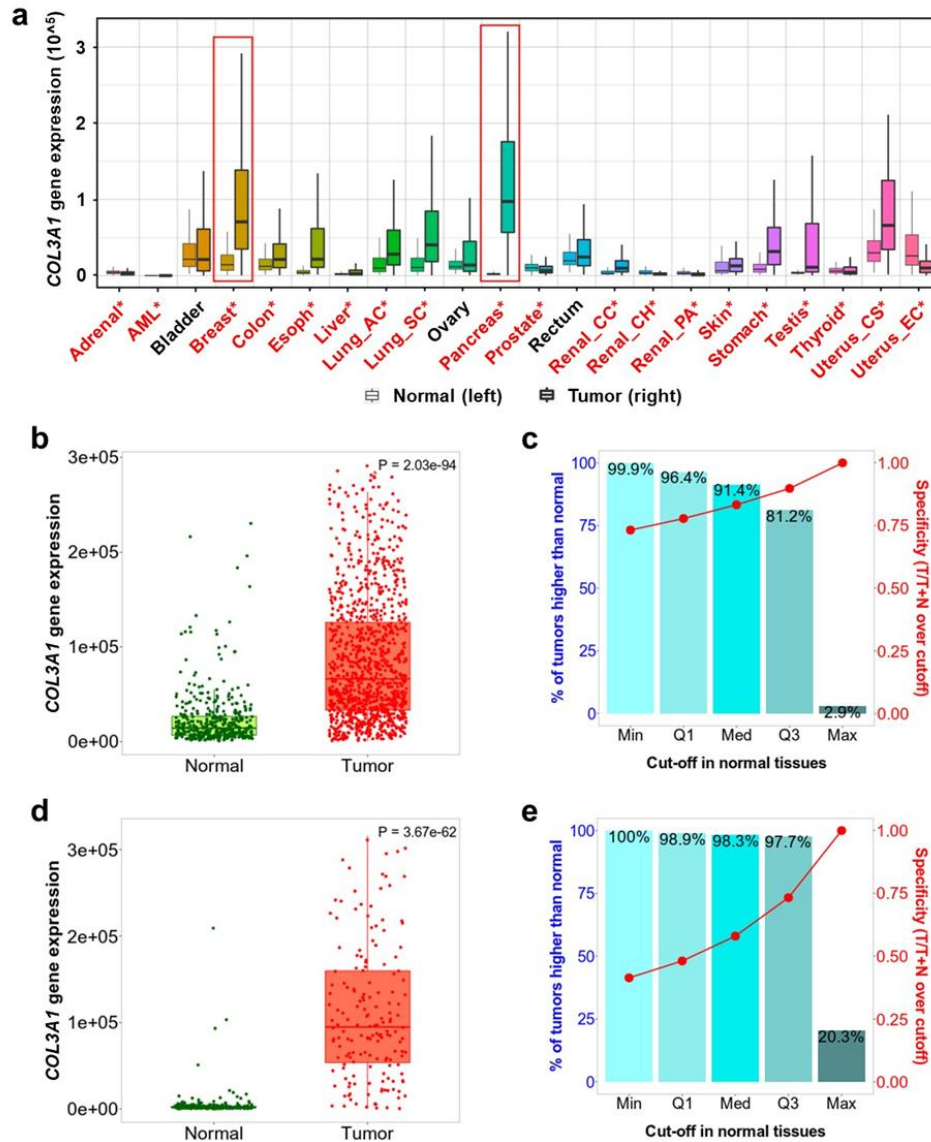

48

49 **Supplementary Figure 4. COL3A1 gene expression in normal and tumor tissues.** (a) COL3A1 gene expression  
 50 in different normal and tumor tissues (n = 15648 normal, 40442 tumor samples). Significant differences by a  
 51 two-sided Mann–Whitney U test are marked with red color (\*  $p < 0.01$ ). Plot was downloaded from the online  
 52 database TNMplot (<https://tnmplot.com/analysis/>). Boxplot represents the median, interquartile range, upper  
 53 whisker, maximum and minimum. Copyright ©: Department of Bioinformatics, Semmelweis University  
 54 2021-2023<sup>2</sup>. (b and c) COL3A1 gene expression profiles of invasive breast carcinoma tissues (n = 1097 patients)  
 55 with normal breast tissues (n = 403 patients). (d and e) COL3A1 gene expression profiles of pancreatic  
 56 adenocarcinoma tissues (n = 177 patients) with normal pancreatic tissues (n = 252 patients). The bars in b, d  
 57 represent the proportions of tumor samples that show higher expression of the selected gene compared to normal  
 58 samples at each of the quantile cutoff values (minimum, 1st quartile, median, 3rd quartile, maximum). P values in b,  
 59 d derived from the Mann–Whitney test comparison between groups.

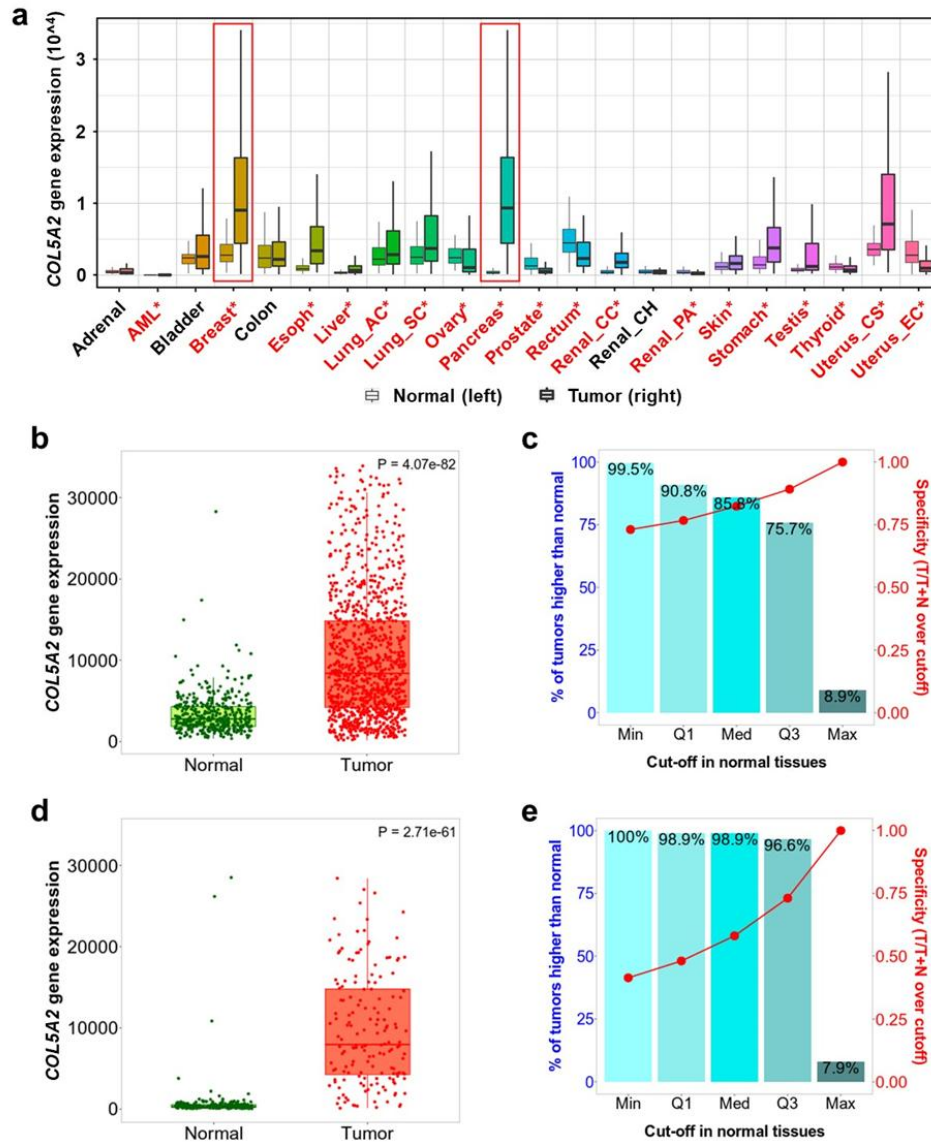

60

61 **Supplementary Figure 5. COL5A2 gene expression in normal and tumor tissues.** (a) COL5A2 gene expression  
 62 in different normal and tumor tissues (n = 15648 normal, 40442 tumor samples). Significant differences by a  
 63 two-sided Mann–Whitney U test are marked with red color (\*  $p < 0.01$ ). Plot was downloaded from the online  
 64 database TNMplot (<https://tnmplot.com/analysis/>). Boxplot represents the median, interquartile range, upper  
 65 whisker, maximum and minimum. Copyright ©: Department of Bioinformatics, Semmelweis University  
 66 2021-2023<sup>2</sup>. (b and c) COL5A2 gene expression profiles of breast invasive carcinoma tissues (n = 1097 patients)  
 67 with normal breast tissues (n = 403 patients). (d and e) COL5A2 gene expression profiles of pancreatic  
 68 adenocarcinoma tissues (n = 177 patients) with normal pancreatic tissues (n = 252 patients). The bars in b, d  
 69 represent the proportions of tumor samples that show higher expression of the selected gene compared to normal  
 70 samples at each of the quantile cutoff values (minimum, 1st quartile, median, 3rd quartile, maximum). P values in b,  
 71 d derived from the Mann–Whitney test comparison between groups.

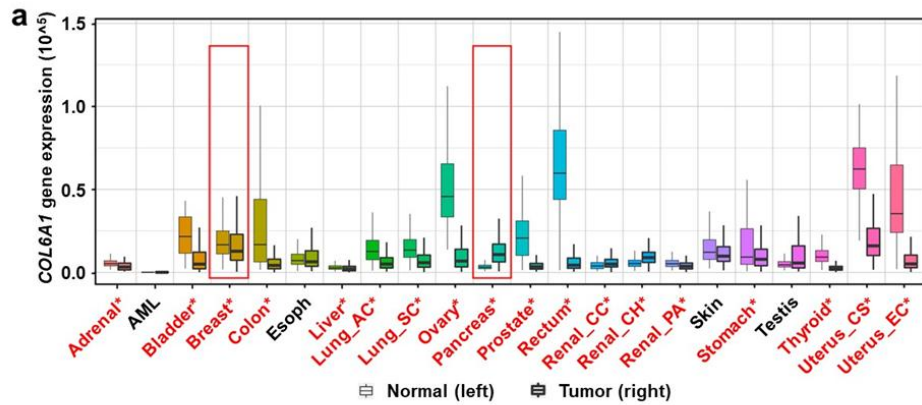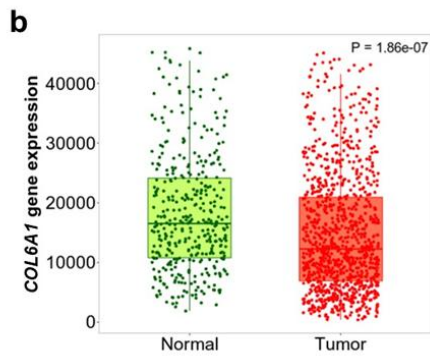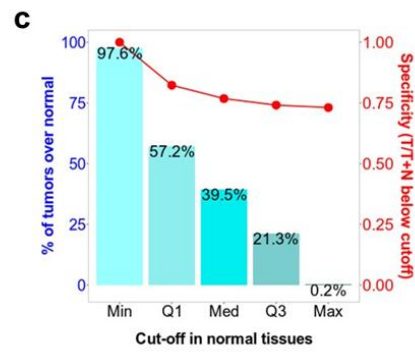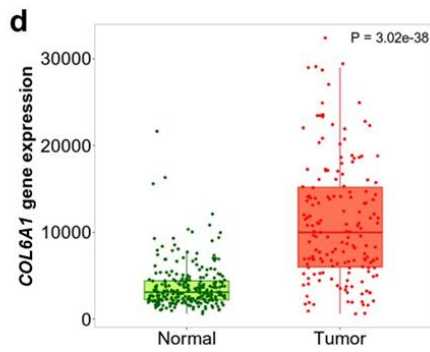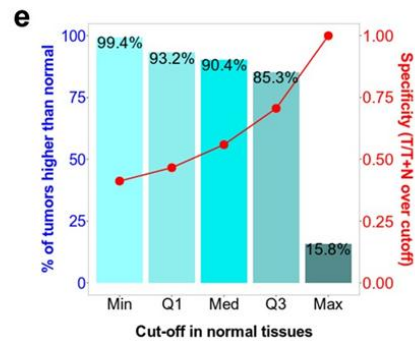

72

73 **Supplementary Figure 6. COL6A1 gene expression in normal and tumor tissues.** (a) COL6A1 gene expression  
 74 in different normal and tumor tissues (n = 15648 normal, 40442 tumor samples). Significant differences by a  
 75 two-sided Mann–Whitney U test are marked with red color (\*  $p < 0.01$ ). Plot was downloaded from the online  
 76 database TNMplot (<https://tnmplot.com/analysis/>). Boxplot represents the median, interquartile range, upper  
 77 whisker, maximum and minimum. Copyright ©: Department of Bioinformatics, Semmelweis University  
 78 2021-2023<sup>2</sup>. (b and c) COL6A1 gene expression profiles of breast invasive carcinoma tissues (n = 1097 patients)  
 79 with normal breast tissues (n = 403 patients). (d and e) COL6A1 gene expression profiles of pancreatic  
 80 adenocarcinoma tissues (n = 177 patients) with normal pancreatic tissues (n = 252 patients). The bars in b, d  
 81 represent the proportions of tumor samples that show higher expression of the selected gene compared to normal  
 82 samples at each of the quantile cutoff values (minimum, 1st quartile, median, 3rd quartile, maximum). P values in b,  
 83 d derived from the Mann–Whitney test comparison between groups.

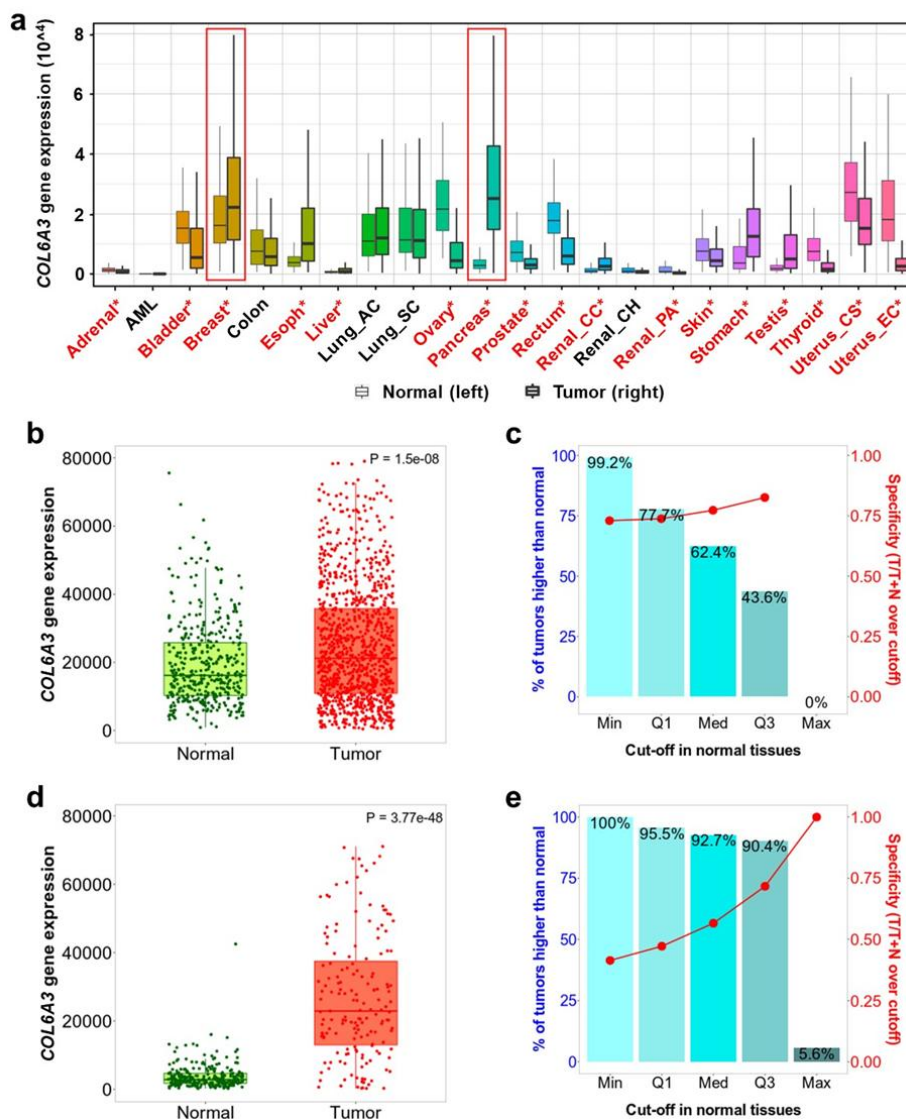

84

85 **Supplementary Figure 7. COL6A3 gene expression in normal and tumor tissues.** (a) COL6A3 gene expression  
 86 in different normal and tumor tissues (n = 15648 normal, 40442 tumor samples). Significant differences by a  
 87 two-sided Mann–Whitney U test are marked with red color (\*  $p < 0.01$ ). Plot was downloaded from the online  
 88 database TNMplot (<https://tnmplot.com/analysis/>). Boxplot represents the median, interquartile range, upper  
 89 whisker, maximum and minimum. Copyright ©: Department of Bioinformatics, Semmelweis University  
 90 2021-2023<sup>2</sup>. (b and c) COL6A3 gene expression profiles of breast invasive carcinoma tissues (n = 1097 patients)  
 91 with normal breast tissues (n = 403 patients). (d and e) COL6A3 gene expression profiles of pancreatic  
 92 adenocarcinoma tissues (n = 177 patients) with normal pancreatic tissues (n = 252 patients). The bars in b, d  
 93 represent the proportions of tumor samples that show higher expression of the selected gene compared to normal  
 94 samples at each of the quantile cutoff values (minimum, 1st quartile, median, 3rd quartile, maximum). P values in b,  
 95 d derived from the Mann–Whitney test comparison between groups.

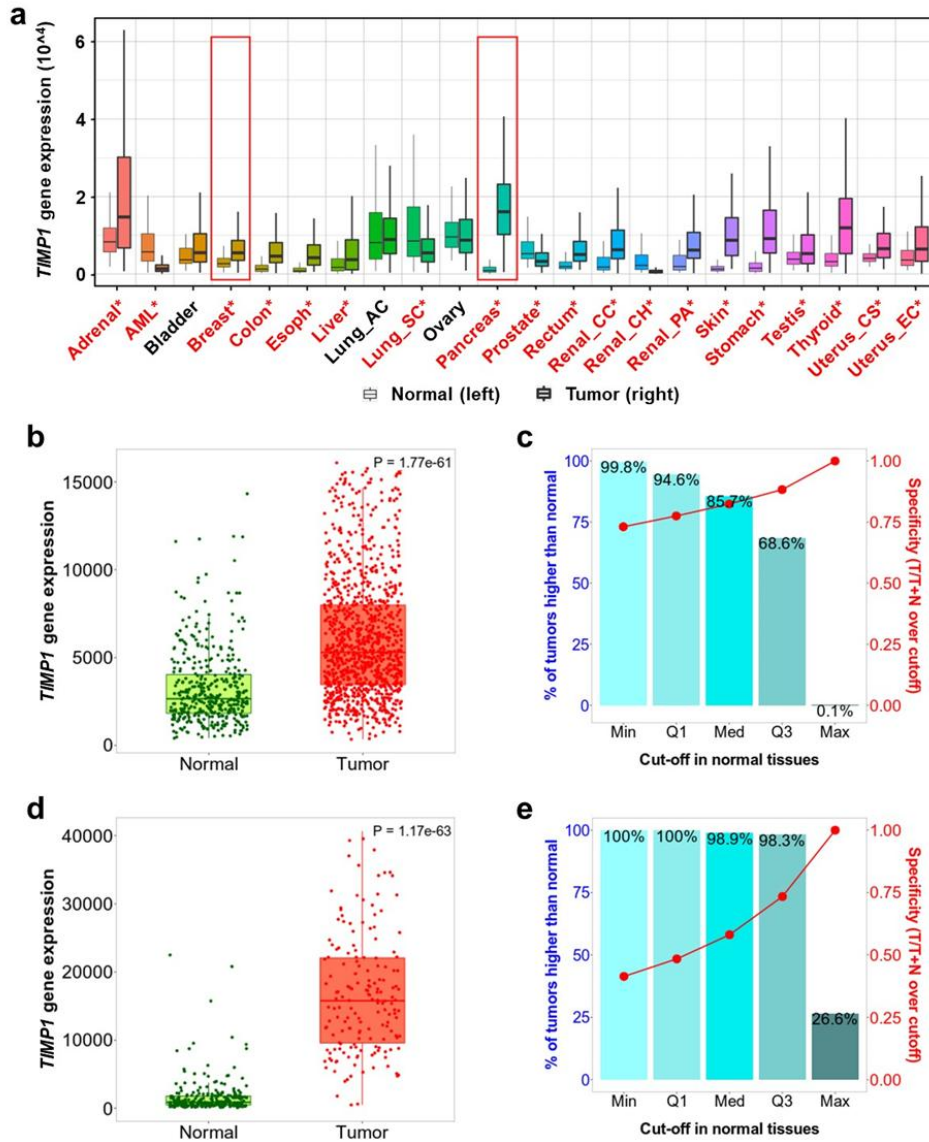

96

97 **Supplementary Figure 8. *TIMP1* gene expression in normal and tumor tissues.** (a) *TIMP1* gene expression in  
 98 different normal and tumor tissues (n = 15648 normal, 40442 tumor samples). Significant differences by a  
 99 two-sided Mann–Whitney U test are marked with red color (\*  $p < 0.01$ ). Plot was downloaded from the online  
 100 database TNMplot (<https://tnmplot.com/analysis/>). Boxplot represents the median, interquartile range, upper  
 101 whisker, maximum and minimum. Copyright ©: Department of Bioinformatics, Semmelweis University  
 102 2021-2023<sup>2</sup>. (b and c) *TIMP1* gene expression profiles of breast invasive carcinoma tissues (n = 1097 patients) with  
 103 normal breast tissues (n = 403 patients). (d and e) *TIMP1* gene expression profiles of pancreatic adenocarcinoma  
 104 tissues (n = 177 patients) with normal pancreatic tissues (n = 252 patients). The bars in b, d represent the  
 105 proportions of tumor samples that show higher expression of the selected gene compared to normal samples at each  
 106 of the quantile cutoff values (minimum, 1st quartile, median, 3rd quartile, maximum). *P* values in b, d derived from  
 107 the Mann–Whitney test comparison between groups.



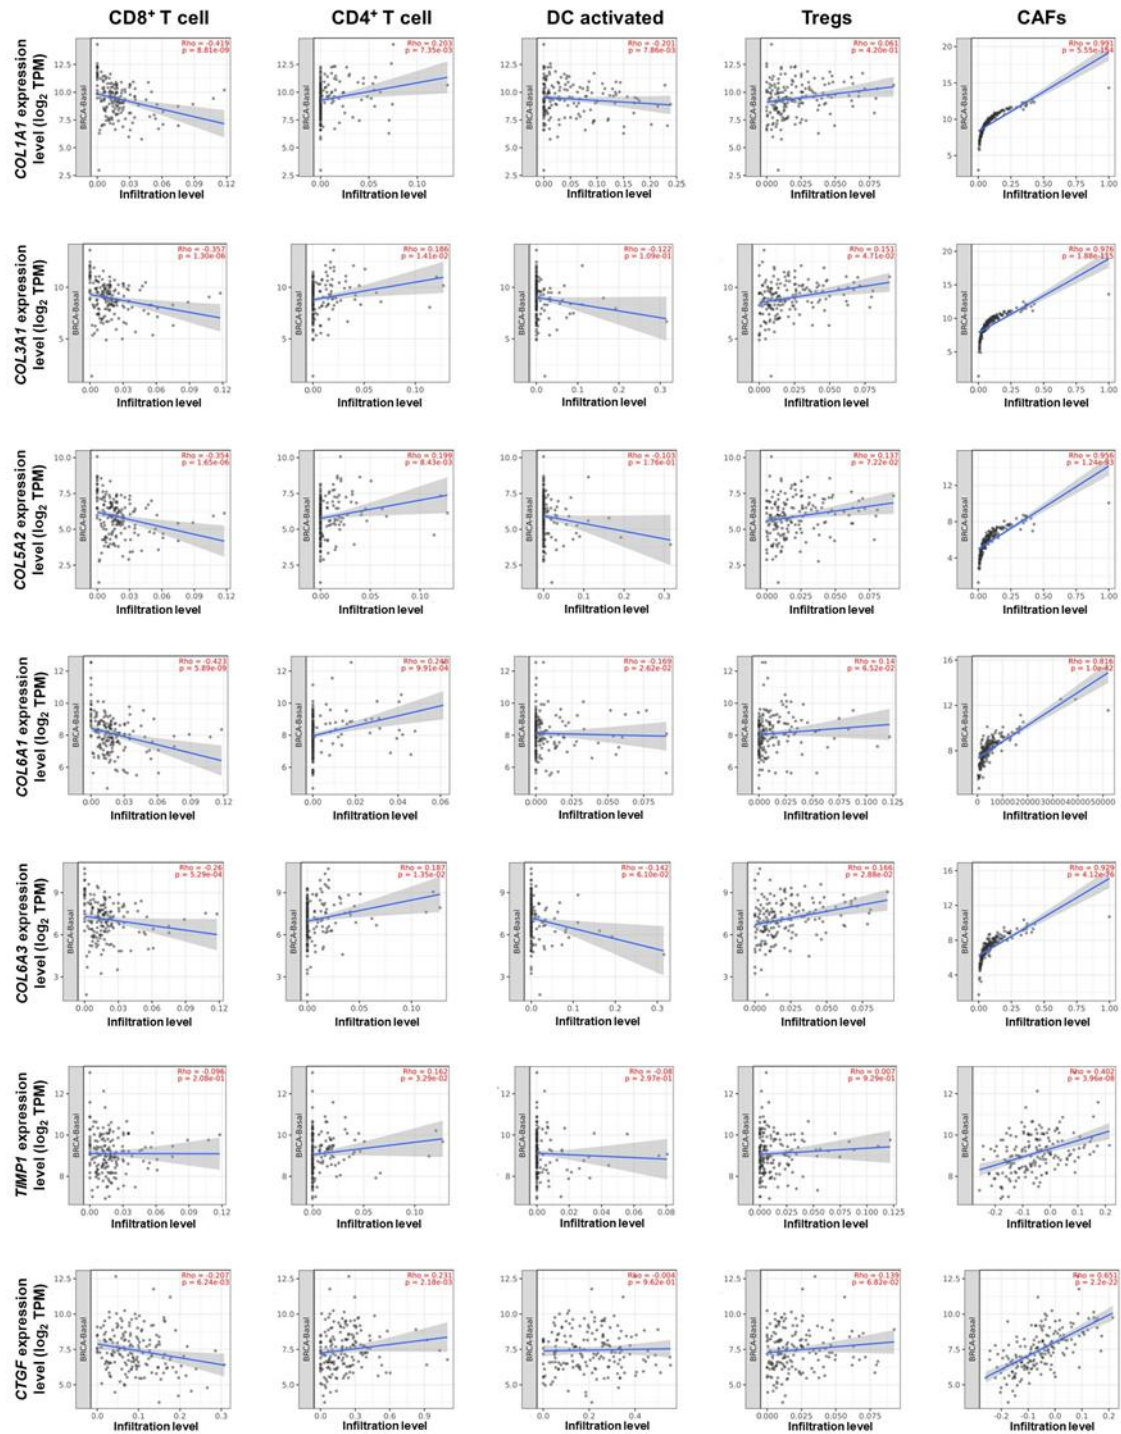

108

109 **Supplementary Figure 9.** The correlations between TGF- $\beta$  target genes (e.g., *COL1A1*, *COL3A1*, *COL5A2*,  
 110 *COL6A1*, *COL6A3*, *TIMP1*, *CTGF*) expression and intratumoral infiltration of CD4<sup>+</sup> T cell, Tregs, CD8<sup>+</sup> T cell,  
 111 myeloid DC activated and CAFs in breast invasive carcinoma (BRCA-Basal) patients (n = 191) in the TIMER  
 112 database. Shaded error bands depict the standard error. Spearman test was used to determine the correlation  
 113 coefficients.

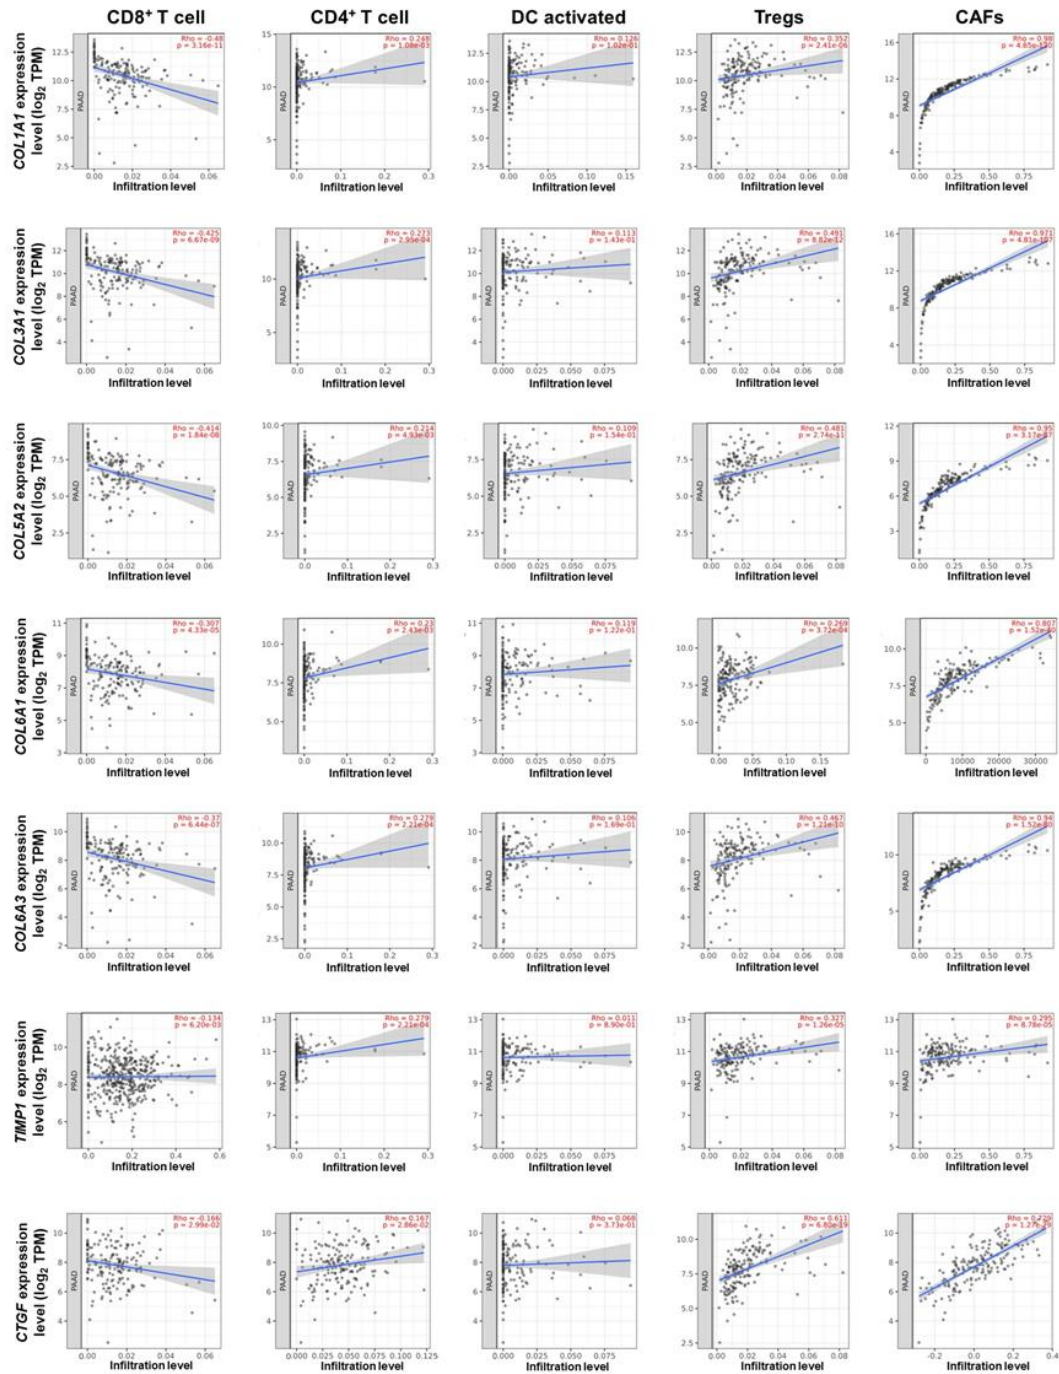

114

115 **Supplementary Figure 10.** The correlations between TGF- $\beta$  target genes (e.g., *COL1A1*, *COL3A1*, *COL5A2*,  
 116 *COL6A1*, *COL6A3*, *TIMP1*, *CTGF*) expression and tumor-infiltrating CD4<sup>+</sup> T cell, Tregs, CD8<sup>+</sup> T cell, myeloid DC  
 117 activated and CAFs in pancreatic adenocarcinoma tissues (from 179 patients) in the TIMER database. Shaded error  
 118 bands depict the standard error. Spearman test was used to determine the correlation coefficients.

119

120

121

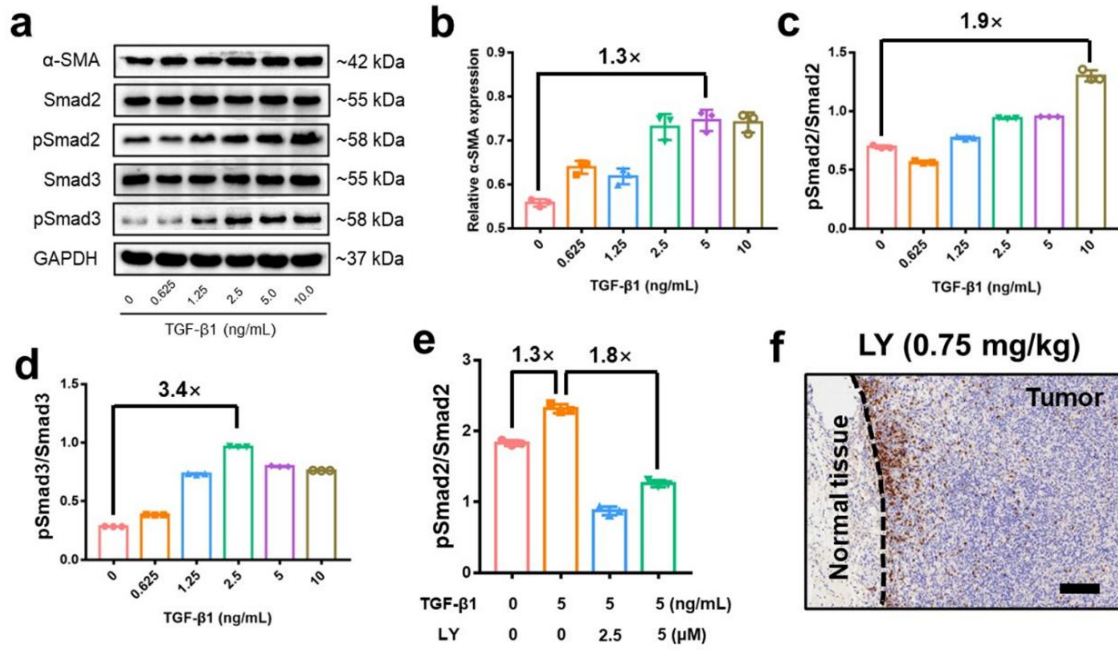

122

123 **Supplementary Figure 11. WB assay of the influence of TGF-β1 and LY on α-SMA expression and**  
 124 **phosphorylated Smad2/3 activation in NIH3T3 cells *in vitro*.** (a) WB analysis of TGF-β1-induced α-SMA,  
 125 phosphorylated (p-)Smad2/3 expression in NIH3T3 cells *in vitro* ( $n = 3$  biologically independent cells). (b-d)  
 126 GAPDH-normalized (b) total α-SMA, (c) phosphorylated Smad2/Smad2 and (d) phosphorylated Smad3/Smad3  
 127 ratios in NIH3T3 cells *in vitro* ( $n = 3$  biologically independent cells). (e) LY-suppressed TGF-β1-induced activation  
 128 of phosphorylated Smad2 in Fig. 2f ( $n = 3$  biologically independent cells). (f) Representative CD3 staining of  
 129 tumor periphery and centre upon intratumoral injection of LY (0.75 mg/kg,  $n = 3$  mice). Scale bar = 100 μm. Error  
 130 bars represent mean ± SD. The experiment was repeated independently 3 times with similar results in a, f.

131

132

133

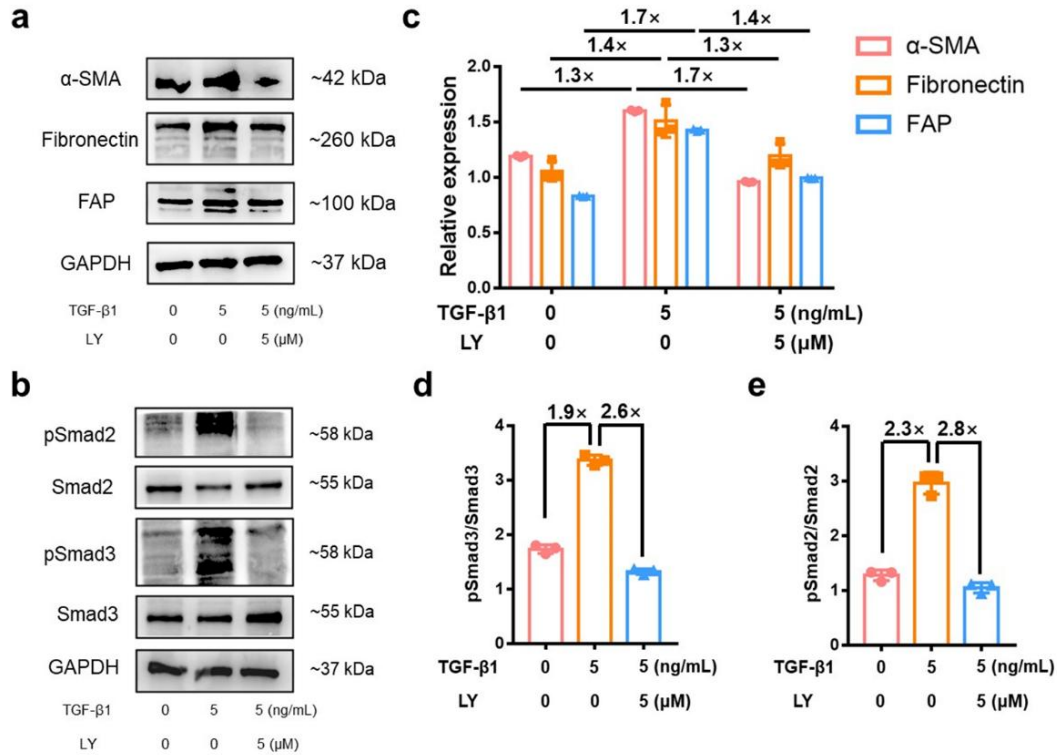

134

135 **Supplementary Figure 12.** (a and b) WB assays of Smad2/3, pSmad2/3, α-SMA, FAP, and fibronectin expressions  
 136 upon TGF-β1 and LY incubation in the primary CAFs of Panc02 tumor *in vitro*. (c) Normalized α-SMA, FAP, and  
 137 fibronectin expression in the primary CAFs from (a) (mean ± SD, n = 3 biologically independent cells). (d and e)  
 138 Normalized pSmad2/Smad2, pSmad3/Smad3 ratios in the primary CAFs from (b) (mean ± SD, n = 3 biologically  
 139 independent cells).

140

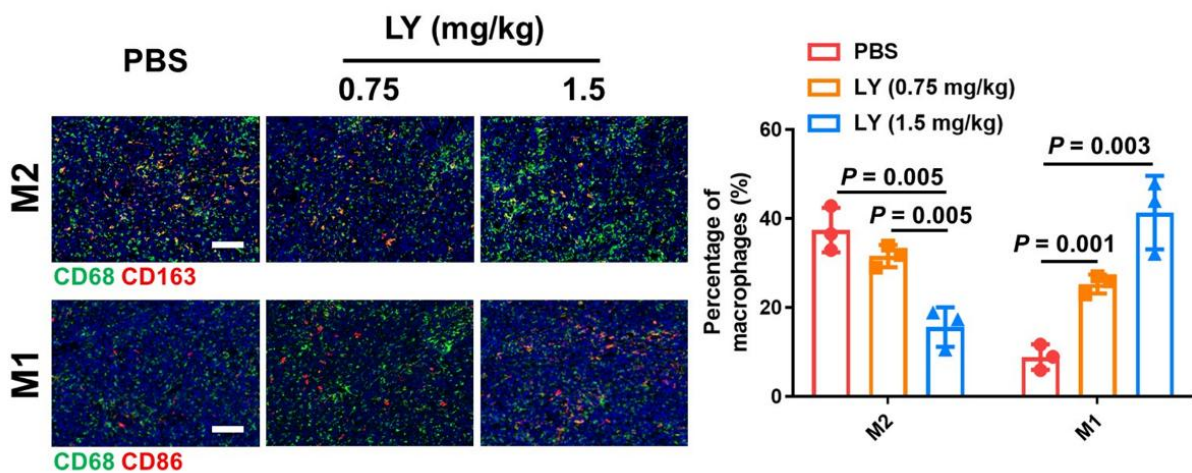

141

142 **Supplementary Figure 13.** Immunofluorescence staining and proportions of the tumor-infiltrating M1 and M2  
 143 macrophages with various treatments (scale bar = 100 μm) (mean ± SD, n = 3 mice). *P* values derived from the  
 144 Student's *t*-test (two-tailed, two-sample unequal variance).

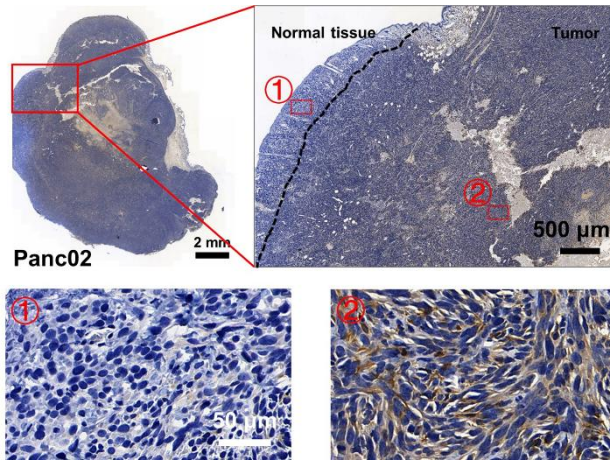

145

146 **Supplementary Figure 14.** Immunohistochemical staining of MMP-2 in a mouse model of Panc02 pancreatic  
 147 adenocarcinoma tumor ex-vivo ( $n = 3$  mice). The experiment was repeated independently 3 times with similar  
 148 results.

149

150

151

152

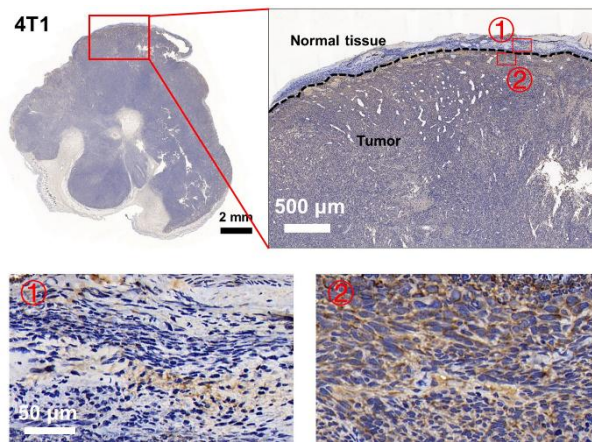

153

154 **Supplementary Figure 15.** Immunohistochemical staining of MMP-2 in a mouse model of 4T1 triple-negative  
 155 breast cancer (TNBC) tumor ex-vivo ( $n = 3$  mice). The experiment was repeated independently 3 times with similar  
 156 results.

157

158

159

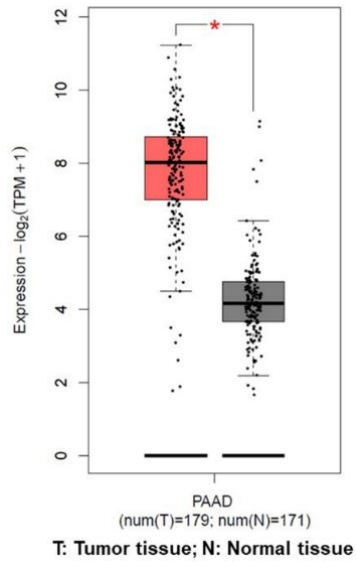

160

161 **Supplementary Figure 16.** *MMP-2* gene expression in pancreatic adenocarcinoma (PAAD) tissues and normal  
 162 pancreatic tissues in the GEPIA dataset. Boxplot represents the median, interquartile range, upper and lower  
 163 whisker, maximum and minimum. Plot was downloaded from the online database GEPIA  
 164 (<http://gepia.cancer-pku.cn/detail.php?gene=&clicktag=boxplot>). *P*-value cutoff = 0.01 (Student's *t* test, significant  
 165 difference is marked with red\*).

166

167

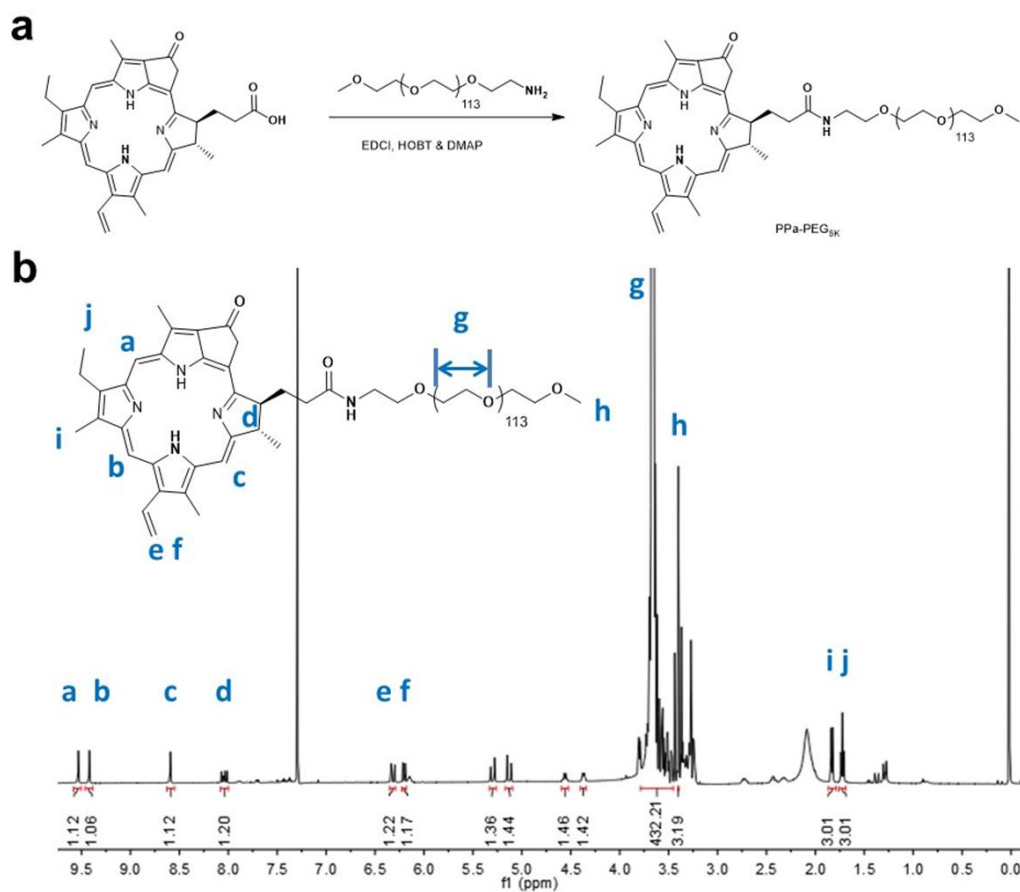

168

169 **Supplementary Figure 17. Synthesis and characterization of PPa-PEG<sub>5k</sub>.** (a) The synthetic route of PPa-PEG<sub>5k</sub>.

170 (b) <sup>1</sup>H-NMR spectrum of PPa-GPLGLAG-PEG<sub>5k</sub>.

171

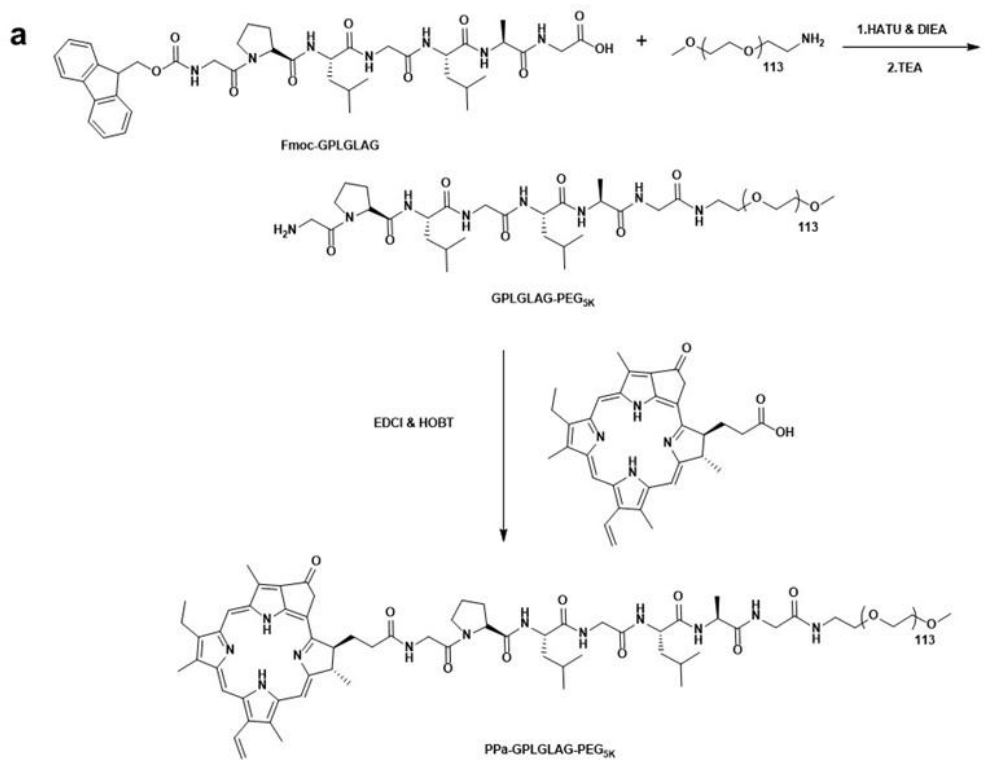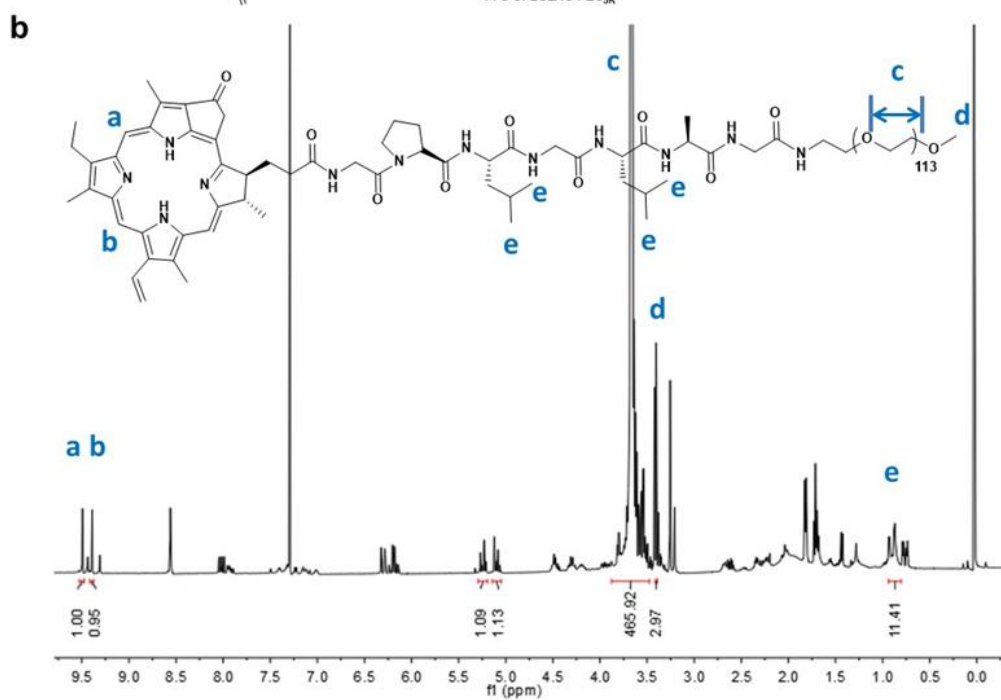

172

173 **Supplementary Figure 18. Synthesis and characterization of PPa-GPLGLAG-PEG<sub>5k</sub>.** (a) The synthetic route

174 of PPa-GPLGLAG-PEG<sub>5k</sub>. (b) <sup>1</sup>H-NMR spectrum of PPa-GPLGLAG-PEG<sub>5k</sub> conjugate.

175

176



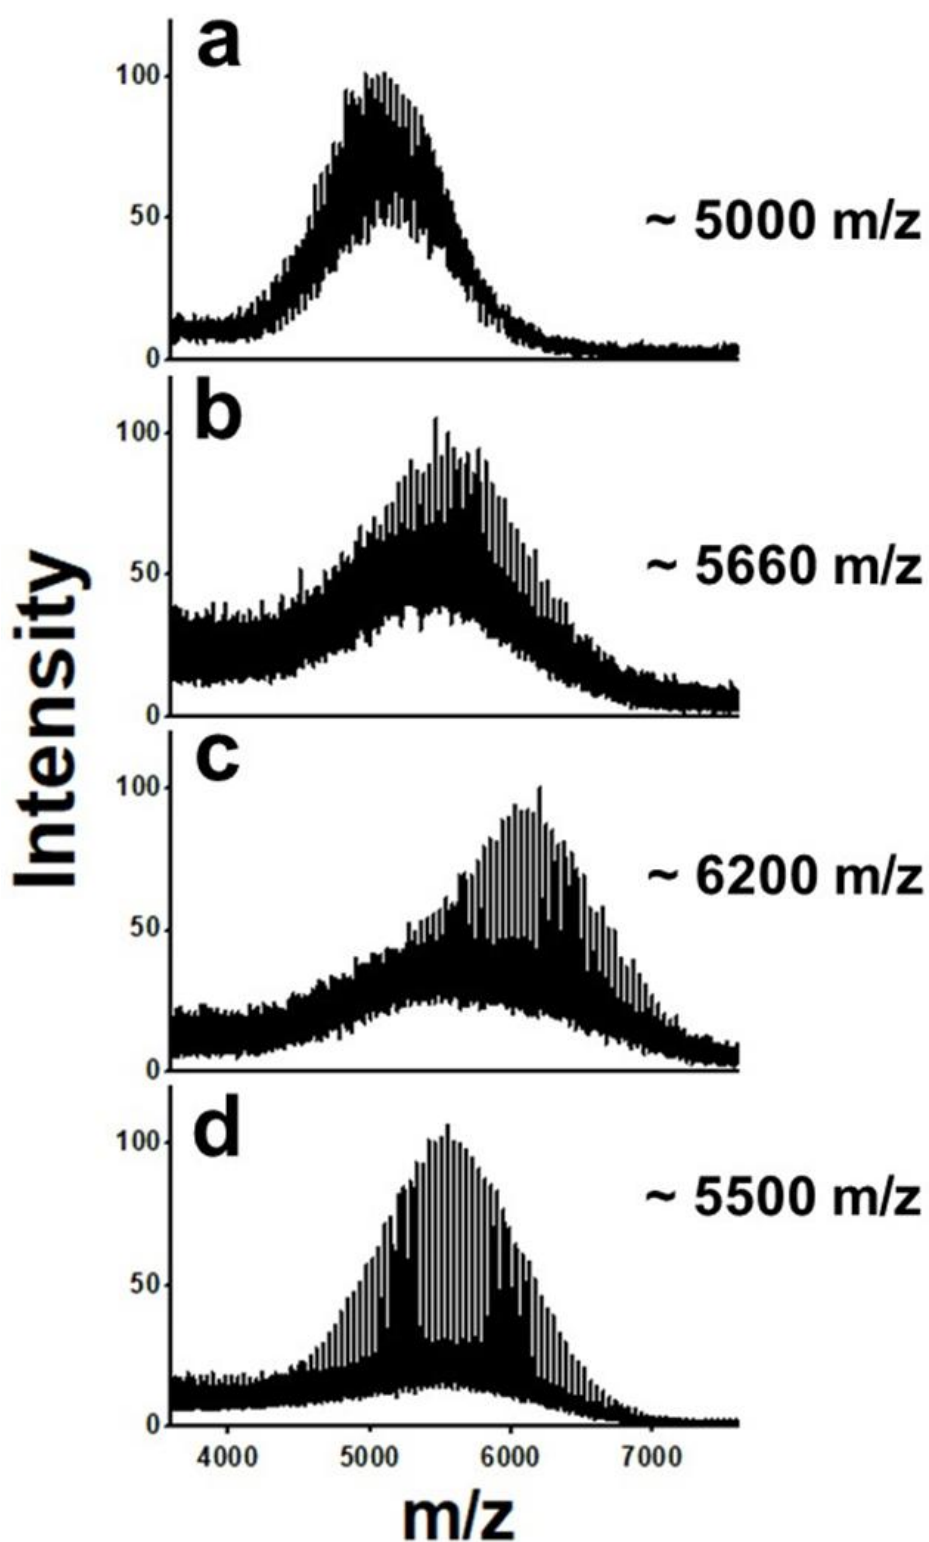

177

178 **Supplementary Figure 19. Characterization of PEG derivatives.** MALDI-TOF MS spectra of (a) PEG<sub>5k</sub>-NH<sub>2</sub>,

179 (b) NH<sub>2</sub>-GPLGLAG-PEG<sub>5k</sub>, (c) PPa-GPLGLAG-PEG<sub>5k</sub>, and (d) PPa-PEG<sub>5k</sub>.

180

181

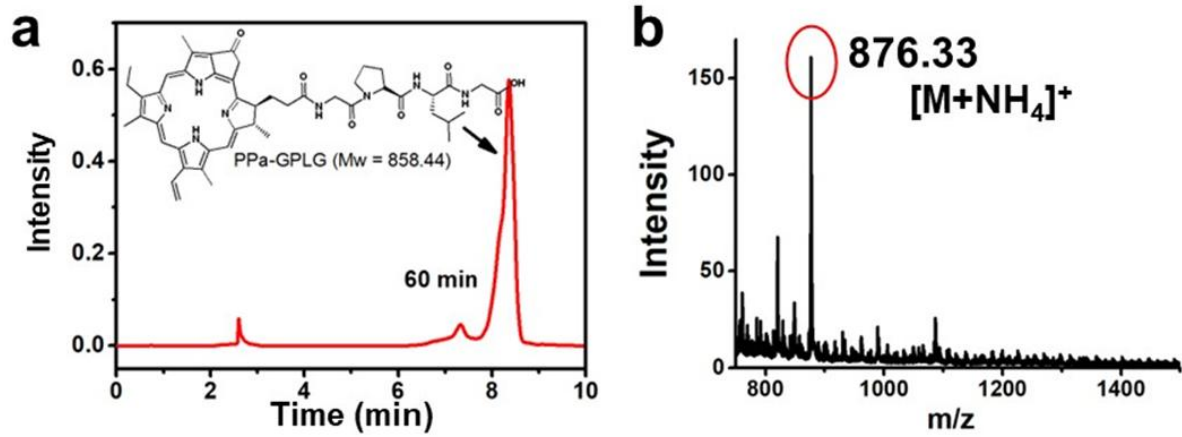

182

183 **Supplementary Figure 20.** (a) HPLC and (b) MALDI-TOF MS spectra examination of PPa-GPLGLAG-PEG<sub>5k</sub>

184 upon 60 min incubation with 40  $\mu$ g/mL of MMP-2.

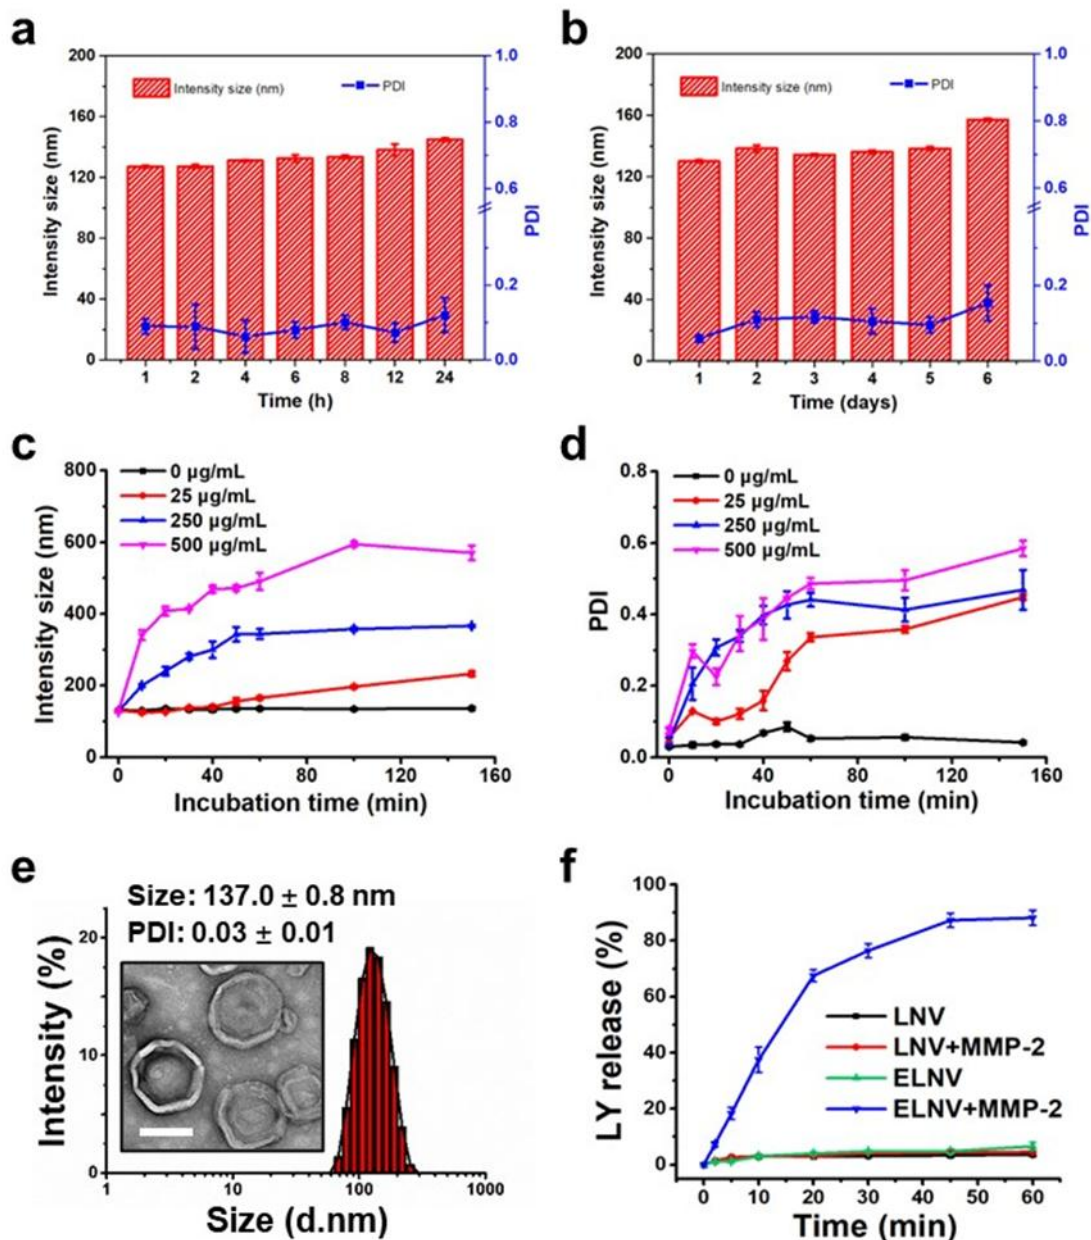

185

186 **Supplementary Figure 21. Characterization of the physicochemical properties of the ELNV nanovesicles. (a)**

187 Serum stability. **(b)** DLS-determined long-term stability of ELNV. **(c and d)** Changes in size **(c)** and PDI **(d)** of

188 ELNV after incubating with MMP-2 at different times. **(e)** The hydrodynamic diameters and representative TEM

189 image of LNV 4 h post-incubation with MMP-2 (40 µg/mL, 37 °C), Scale bar = 100 nm. The experiment was

190 repeated independently 3 times with similar results. **(f)** Cumulative LY release from LNV or ELNV nanovesicles

191 with or without 40 µg/mL of MMP-2 incubation. All data are presented as mean ± SD.  $n = 3$  independent

192 experiments.

193

194

195

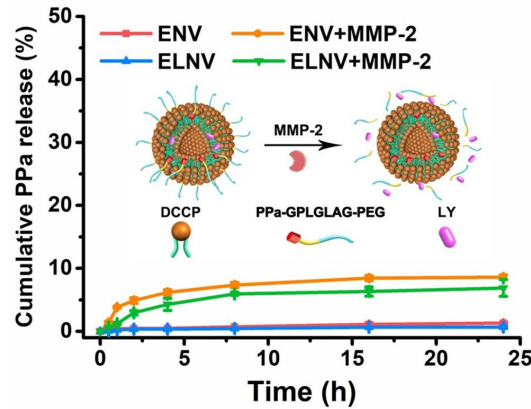

196

197 **Supplementary Figure 22.** The cumulative PPa release from ENV and ELNV with or without MMP-2 incubation  
 198 (mean  $\pm$  SD, n = 3 independent experiments).

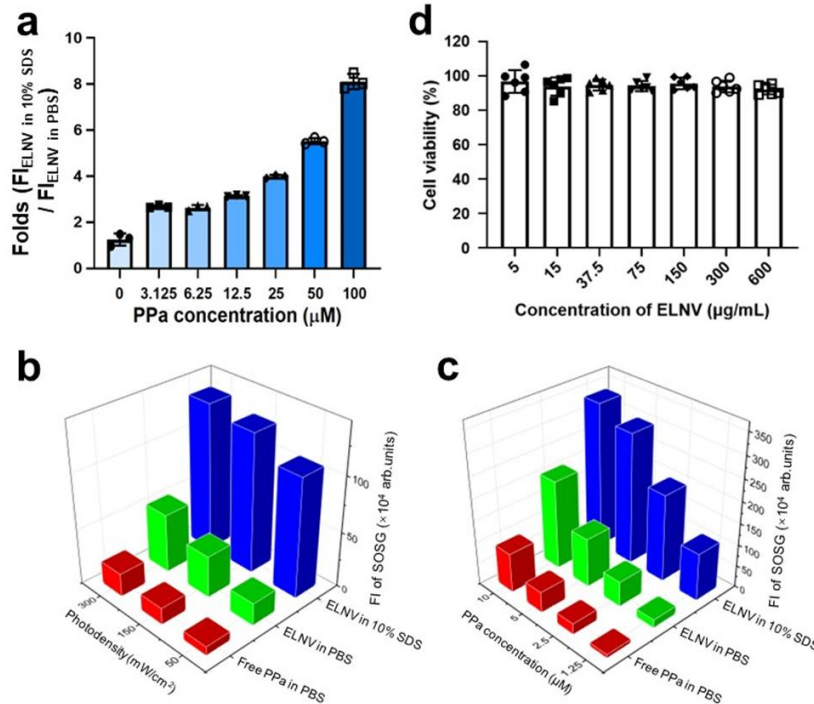

199

200 **Supplementary Figure 23.** The photoactivity and biocompatibility of ELNV nanovesicles. (a) The ratios of the  
 201 PPa fluorescence intensity of ELNV in 10% SDS and PBS (upon the different PPa concentrations) (mean  $\pm$  SD, n =  
 202 3 independent experiments). (b) The generation of  $^1\text{O}_2$  by free PPa in PBS, ELNV in PBS, and 10% SDS, under  
 203 different photodensity of 671 nm laser, was measured using SOSG as a fluorescent probe (Ex/Em = 504/525, the  
 204 PPa concentration is 1.25  $\mu\text{M}$ ). (c) The generation of  $^1\text{O}_2$  by free PPa in PBS, ELNV in PBS, and 10% SDS, under  
 205 different concentrations of PPa, was measured using SOSG as a fluorescent probe (Ex/Em = 504/525, the  
 206 photodensity is 150  $\text{mW}/\text{cm}^2$ ). (d) Cell viability of ELNV in 4T1 cells (mean  $\pm$  SD, n = 6 biologically independent

207 cells).

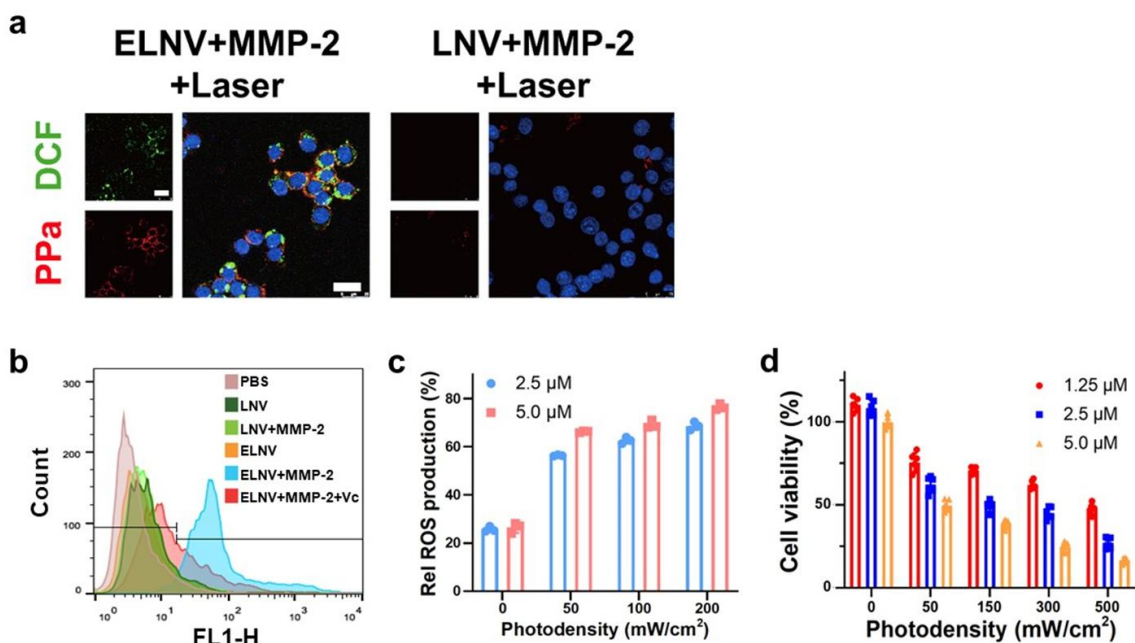

208

209 **Supplementary Figure 24. The intracellular ROS generation and PDT of ELNV nanovesicles. (a)**

210 Fluorescence images of 4T1 cells stained with 10 μM of DCFH-DA upon different treatments. Scale bars = 25 μm.

211 The experiment was repeated independently 3 times with similar results. **(b)** The histogram represents the

212 intracellular ROS generation of different nanovesicles measured by flow cytometry. **(c)** Flow cytometry

213 quantitative analysis of the production efficiency of ROS with different power densities and PPa concentrations

214 (mean ± SD, n = 3 biologically independent cells). **(d)** The phototoxicity of ELNV in 4T1 cells upon different

215 conditions (mean ± SD, n = 6 biologically independent cells).

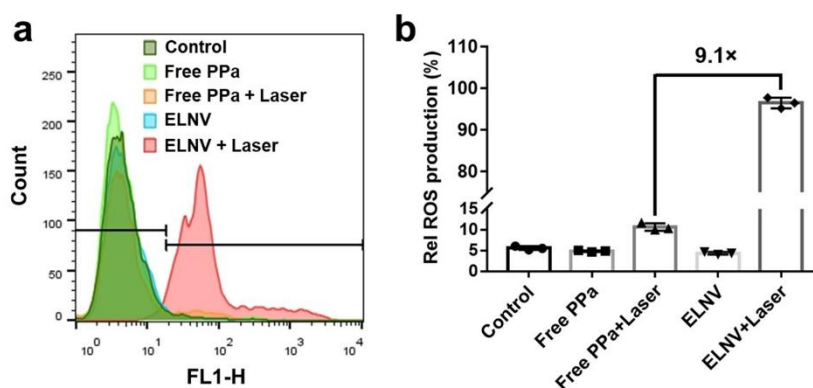

216

217 **Supplementary Figure 25. (a)** The histogram represents the intracellular ROS generation of different free PPa and

218 nanovesicles measured by flow cytometry. **(b)** Flow cytometric analysis of intracellular ROS generation in 4T1

219 cells upon the 671 nm laser irradiation (1 min at a photodensity of 150 mW/cm<sup>2</sup>) (mean ± SD, n = 3 biologically

220 independent cells).

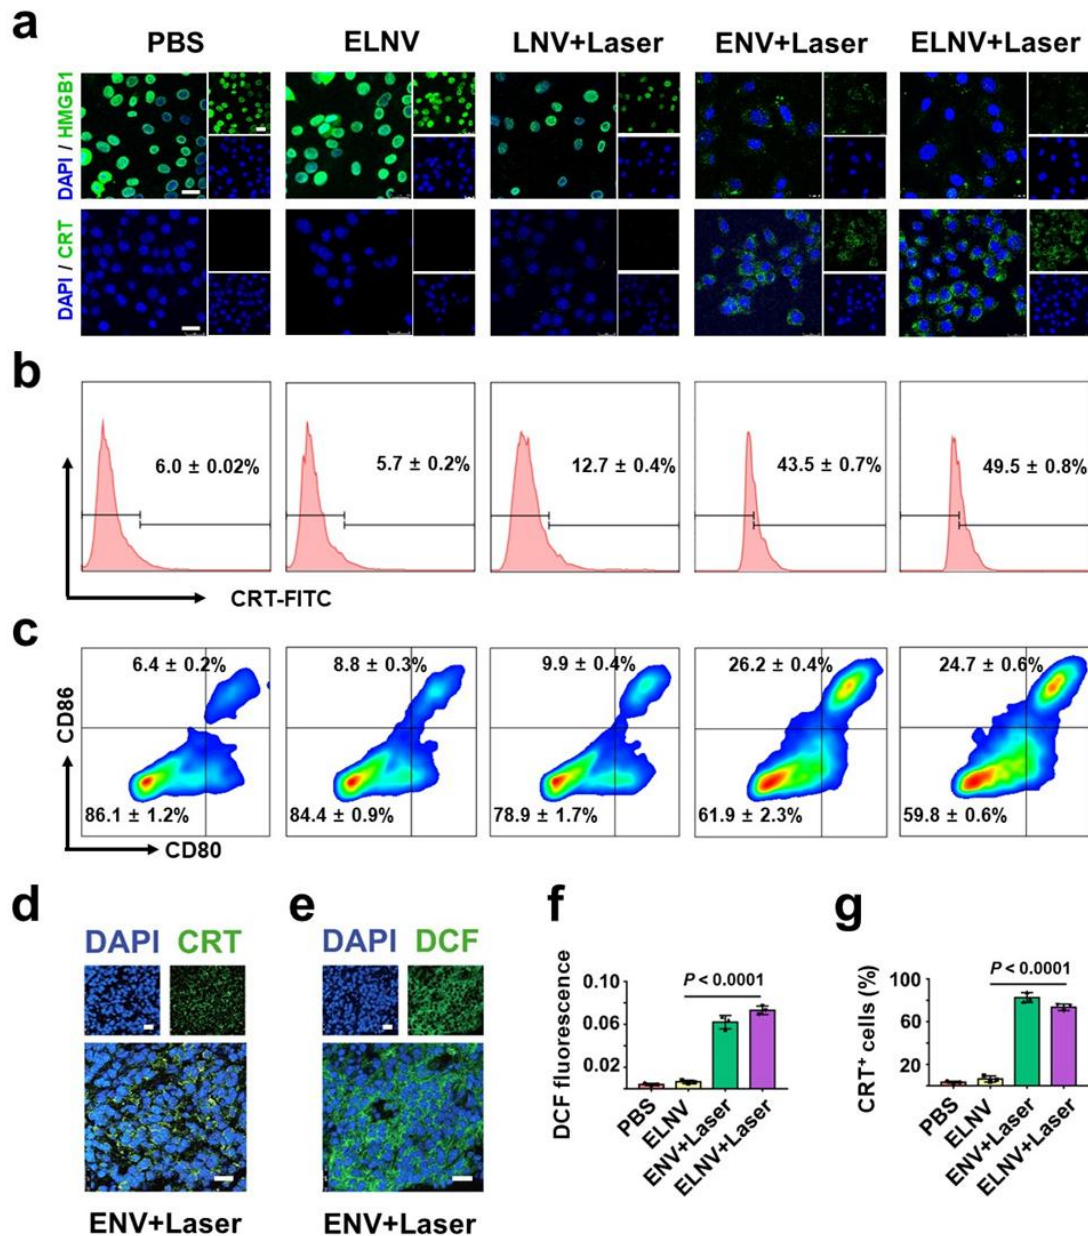

221

222 **Supplementary Figure 26. PDT-induced ICD effect of ELNV nanovesicles *in vitro* and *in vivo*.** (a) CLSM  
 223 images of PDT-induced extracellular efflux of HMGB1 release and CRT exposure on the membrane of the tumor  
 224 cells (Scale bar = 25  $\mu$ m). The experiment was repeated independently 3 times with similar results. (b)  
 225 Representative flow cytometry histogram of CRT exposure *in vitro*. (c) Flow cytometry examination of DCs  
 226 maturation before co-incubation with different nanovesicles-pretreated 4T1 cells. (d and e) Fluorescence images of  
 227 (d) CRT exposure and (e) ROS generation in 4T1 tumor sections *in vivo*. Scale bars = 25  $\mu$ m. (f and g)  
 228 Fluorescence semi-quantitative analysis of ROS generation (f) and CRT exposure (g) in Fig. 3I, and (d and e)  
 229 (mean  $\pm$  SD, n = 3 mice,  $P = 1.12 \times 10^{-5}$  and  $9.86 \times 10^{-6}$ ).  $P$  values derived from the Student's  $t$ -test (two-tailed,  
 230 two-sample unequal variance).

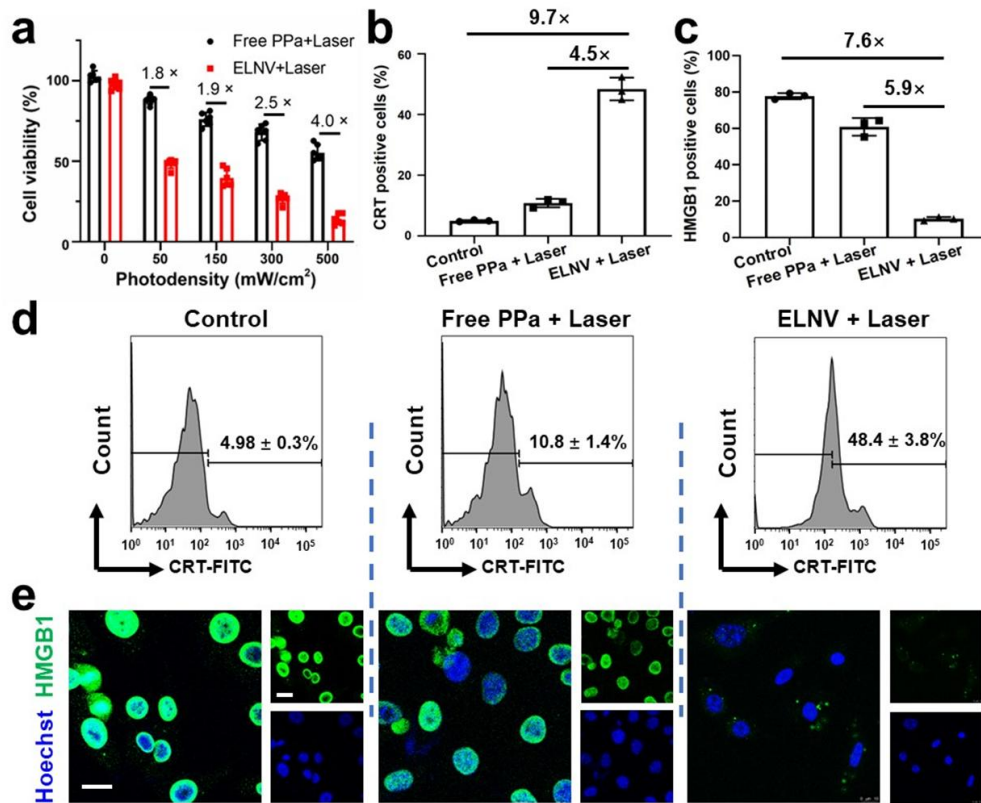

231

232 **Supplementary Figure 27.** (a) Phototoxicity of free PPa and ELNV in 4T1 cells upon different conditions (mean ±  
 233 SD, n = 6 biologically independent cells). (b and c) PDT-triggered CRT exposure (b) and HMGB1 efflux (c) in 4T1  
 234 cells *in vitro* (mean ± SD, n = 3 biologically independent cells). 4T1 cells were pretreated with free PPa or ELNV  
 235 for 4 h and irradiated with the 671 nm laser at a PPa concentration of 5 μM. (d) Representative flow cytometry  
 236 histogram of CRT exposure *in vitro* (n = 3). (e) CLSM images of PDT-induced extracellular efflux of HMGB1  
 237 release of the tumor cells (Scale bar = 20 μm). The experiment was repeated independently 3 times with similar  
 238 results. Nanovesicles were pretreated with 40 μg/mL of MMP-2 for 24 h at 37 °C before addition to cells (mean ±  
 239 SD, n = 3).

240

241

242

243

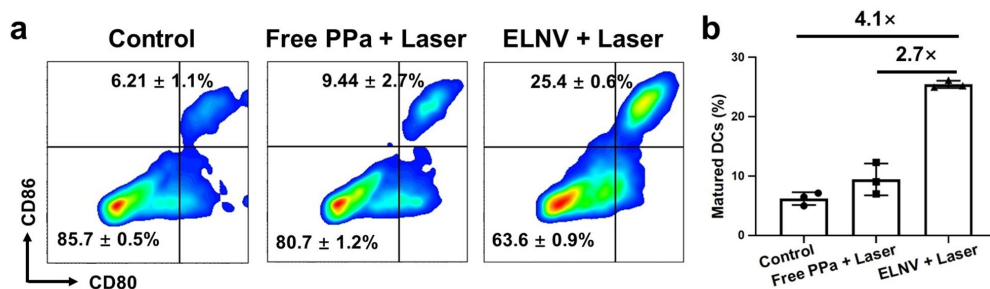

244

245 **Supplementary Figure 28.** (a) Flow cytometry examination of DC maturation upon co-incubation with  
 246 nanovesicle-pretreated 4T1 cells. (b) The percentage of PDT-induced DC maturation *in vitro* (mean ± SD, n = 3  
 247 biologically independent cells).

248

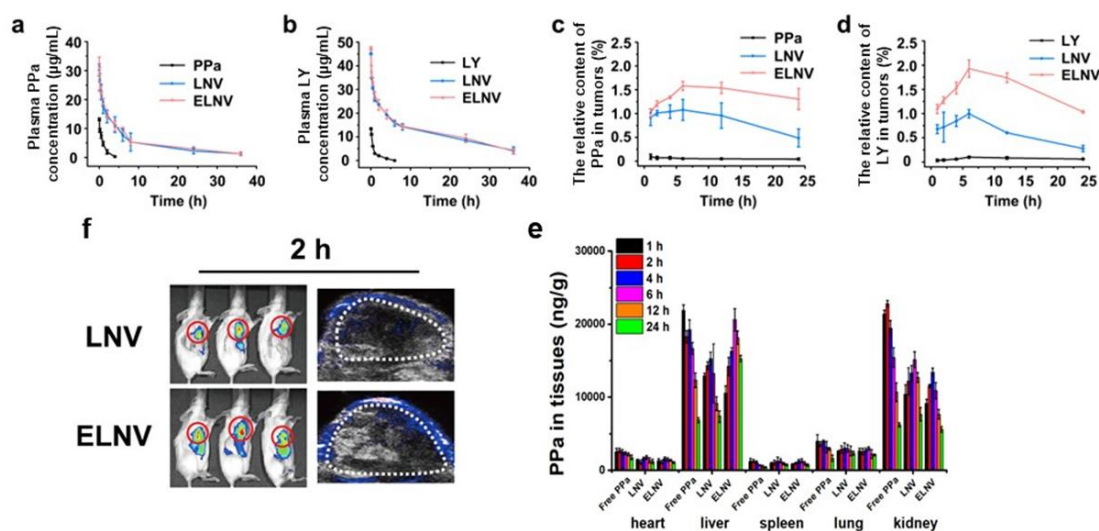

249

250 **Supplementary Figure 29. Distribution of ELNV nanovesicles *in vivo*.** (a-d) Plasma concentration or tumor  
 251 tissue content–time profiles of (a and c) PPa and (b and d) LY in mice after intravenous administration of Free PPa,  
 252 Free LY, LNV, and ELNV at a PPa and LY dose of 5 and 20 mg/kg, respectively. The bioavailability values of PPa,  
 253 LNV, and ELNV are 14.33 ± 0.61, 182.4 ± 56.84, 202.81 ± 16.25 mg/L\*h in (a). The bioavailability values of LY,  
 254 LNV, and ELNV are 14.17 ± 0.60, 420.83 ± 26.70 and 436.019 ± 9.12 mg/L\*h in (b). (e) Distributions of PPa in  
 255 healthy tissues of mice treated with Free PPa, LNV, or ELNV at a dose of 5 mg/kg over time. (f) Fluorescence (left)  
 256 and PA (right) images of 4T1 tumor-bearing mice 2 h after intravenous injection with LNV or ELNV. The red and  
 257 white circles indicate the tumor sites. All data are presented as mean ± SD. n = 3 mice.

258

259

260



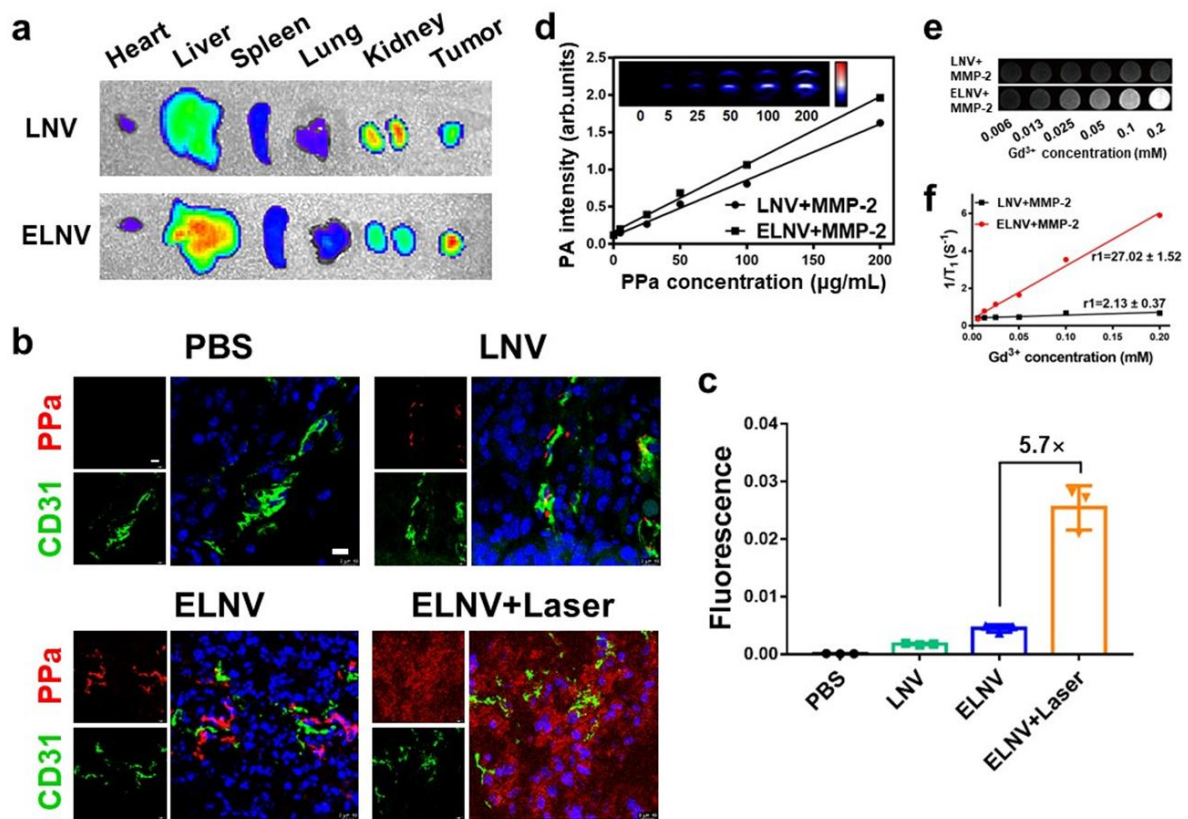

261

262 **Supplementary Figure 30. Multimodality imaging and tumor penetration of ELNV nanovesicles.** (a)  
 263 Representative ex vivo fluorescence images of tumors and other tissues of mice upon LNV or ELNV. (b) Analysis  
 264 of PPa distributions in tumors. The tumor blood vessels were immunostained with anti-CD31 antibody ( $n = 3$  mice,  
 265 Scale bar = 10  $\mu\text{m}$ ). The experiment was repeated independently 3 times with similar results. (c) PPa fluorescence  
 266 of CD31-stained tumor tissues was quantified by ImageJ (mean  $\pm$  SD,  $n = 4$  mice). (d) Plots of *in vitro* PA signal  
 267 versus various PPa concentrations of LNV or ELNV with MMP-2. Inset is the PA images of ELNV nanovesicles  
 268 with various PPa concentrations of 0, 5, 25, 50, 100, and 200  $\mu\text{g/mL}$ . (e)  $T_1$ -weighted MR images and (f) the  
 269 corresponding  $T_1$  relaxation rate of gadolinium-loaded ELNV or LNV at various concentrations of gadolinium with  
 270 MMP-2.

271

272

273

274

275

276

277

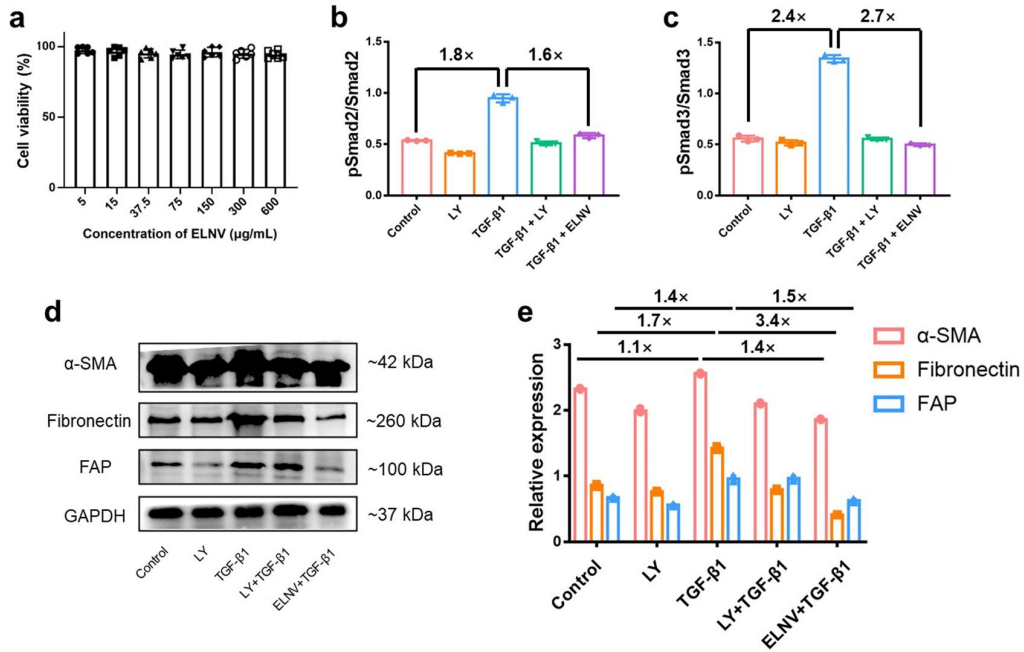

278

279 **Supplementary Figure 31. The biocompatibility of ELNV nanovesicles and ELNV reverse the activation of**

280 **CAFs *in vitro*.** (a) Cell viability of ELNV in NIH3T3 cells (n = 6 biologically independent cells). (b and c) The

281 GAPDH-normalized phosphorylated (p-) and total Smad2/3 expression of NIH3T3 cells *in vitro* in Fig. 4a (n = 3

282 biologically independent cells). (d) WB analysis of the expression of  $\alpha$ -SMA, FAP, and fibronectin upon different

283 conditions. (e) The GAPDH-normalized  $\alpha$ -SMA, FAP and fibronectin expression of NIH3T3 cells *in vitro* (n = 3

284 biologically independent cells). All data are presented as mean  $\pm$  SD.

285

286

287

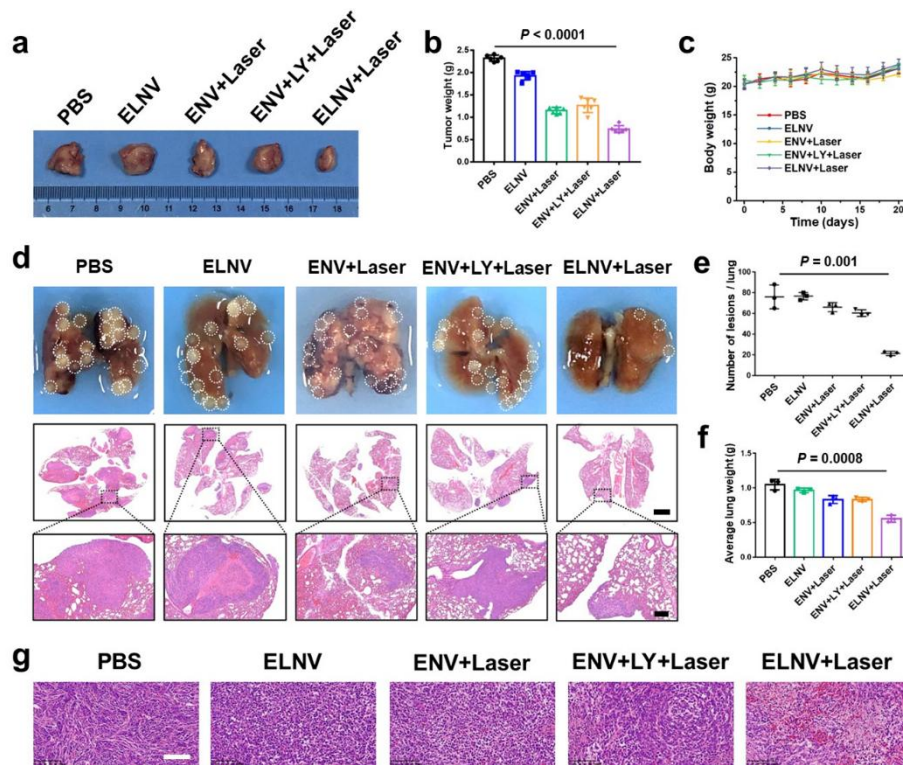

288

289 **Supplementary Figure 32. Therapeutic efficacy of ELNV nanovesicles *in vivo*.** (a) Typical photographs of  
 290 excised tumors from different conditions. (b) The average weight of tumors in mice after treatments ( $n = 6$  mice,  $P$   
 291  $= 5.01 \times 10^{-12}$ ). (c) Averaged body weight of mice under different conditions  $n = 6$  mice). (d) Representative images  
 292 of the lung tissue and hematoxylin and eosin (H&E) staining of the pulmonary metastasis nodules after different  
 293 treatments for each group (day 20). Scale bar = 2 mm and 200  $\mu\text{m}$  (enlarged image). (e) The number of lung tumors  
 294 per mouse was scored and averaged for each treatment group ( $n = 3$  mice). (f) Average lung weight of each group  
 295 ( $n = 3$  mice). (g) H&E-stained tumor slices from different groups as indicated ( $n = 3$  mice, scale bar = 100  $\mu\text{m}$ ).  
 296 The experiment was repeated independently 3 times with similar results. All data are presented as mean  $\pm$  SD.  $P$   
 297 values derived from the Student's  $t$ -test (two-tailed, two-sample unequal variance).

298

299

300

301

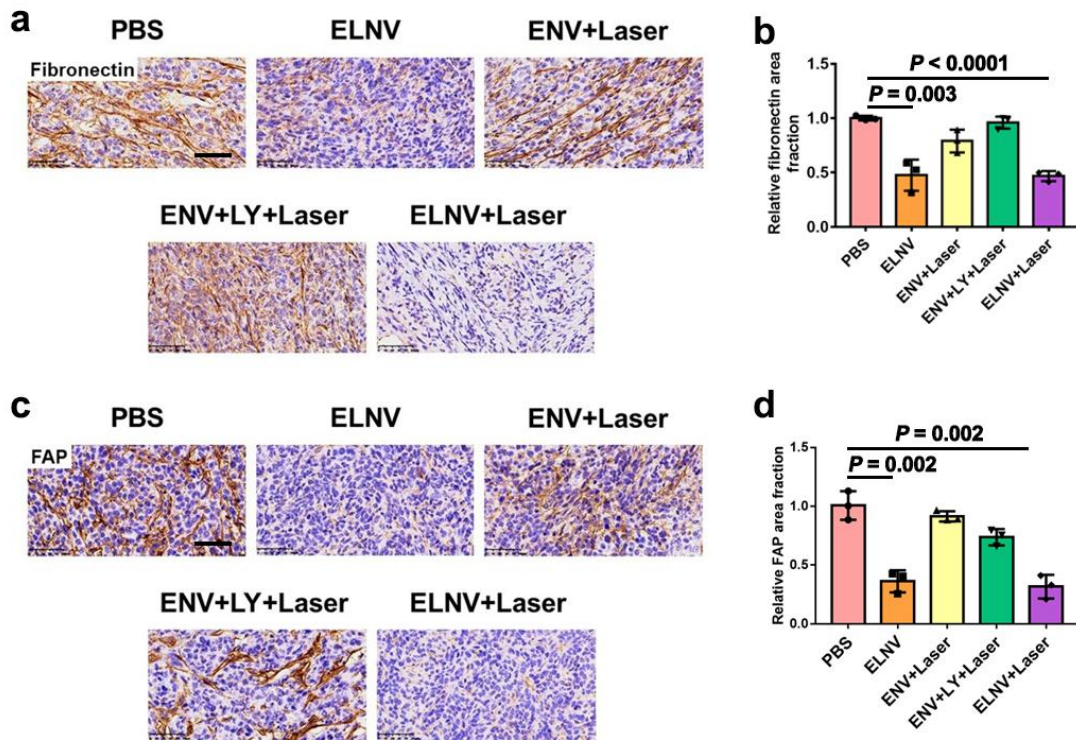

302

303 **Supplementary Figure 33. Fibronectin and FAP expression in 4T1-tumors *in vivo* after different treatments.**

304 (a and c) Immunohistochemical staining of fibronectin (a) and FAP (c) expression at the end of antitumor study

305 (scale bars = 50  $\mu$ m). (b and d) Semi-quantitative of fibronectin (b,  $P = 3.28 \times 10^{-3}$  and  $5.79 \times 10^{-5}$ ) and FAP (d)

306 by Image J. All data are presented as mean  $\pm$  SD. n = 3 mice. P values derived from the Student's t-test (two-tailed,

307 two-sample unequal variance).

308

309

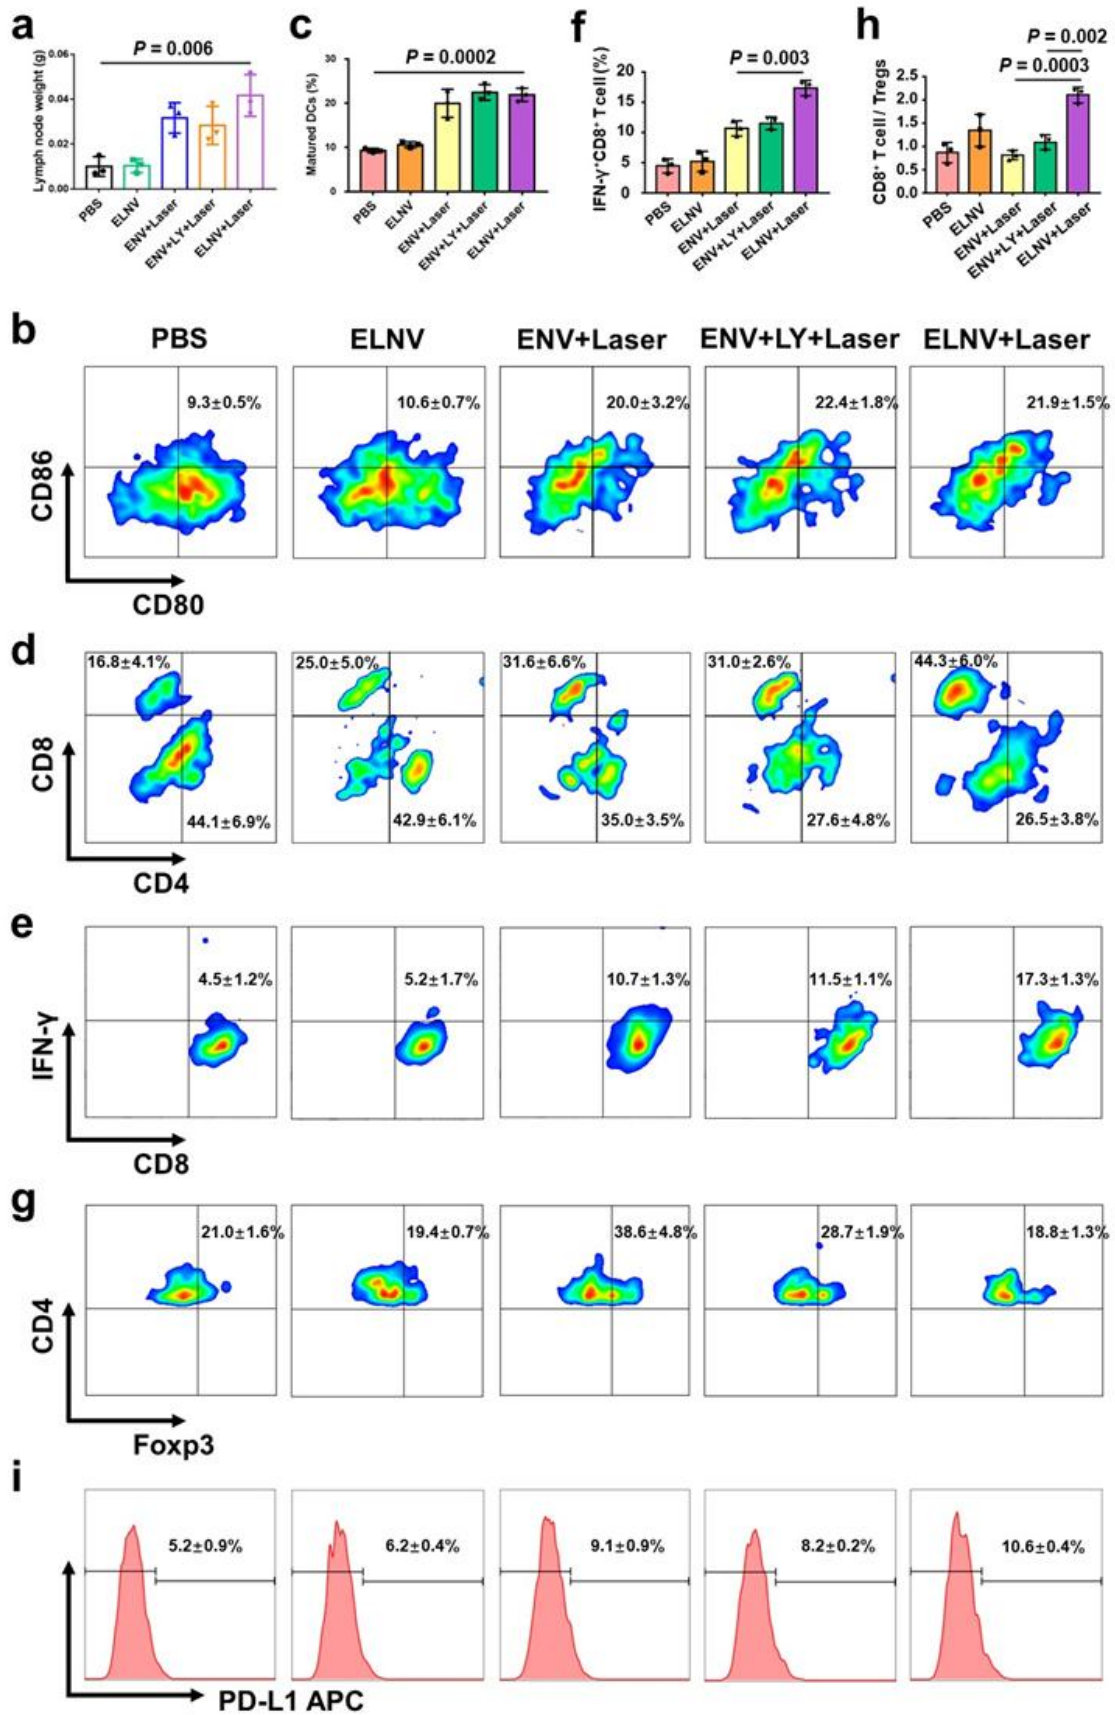

310

311 Supplementary Figure 34. Immunologic evaluation of ELNV nanovesicle-based immunotherapy of 4T1

312 **tumor.** (a) The weight of lymph nodes of 4T1 tumor-bearing mice at the end of treatments. (b and c) The frequency  
313 of matured DCs (CD11c<sup>+</sup>CD80<sup>+</sup>CD86<sup>+</sup>) in the tumor-draining LNs of 4T1 tumor. (d) Flow cytometric  
314 quantification of intratumoral infiltration of CD4<sup>+</sup> and CD8<sup>+</sup> T cells in 4T1 tumor model. (e-g) Flow cytometric  
315 quantification of (e and f) intratumoral infiltration of IFN- $\gamma$ <sup>+</sup>CD8<sup>+</sup> T cells (CD3<sup>+</sup>CD8<sup>+</sup>IFN- $\gamma$ <sup>+</sup>) and (g) Tregs  
316 (CD3<sup>+</sup>CD4<sup>+</sup>Foxp3<sup>+</sup>) in 4T1 tumor model. (h) CD8<sup>+</sup> T cell-to-Treg ratio in 4T1 tumor-bearing mice. (i) Flow  
317 cytometric quantification of PD-L1 expression in 4T1 tumor model. All data are presented as mean  $\pm$  SD. n = 3  
318 mice. *P* values derived from the Student's *t*-test (two-tailed, two-sample unequal variance).

319

320

321

322

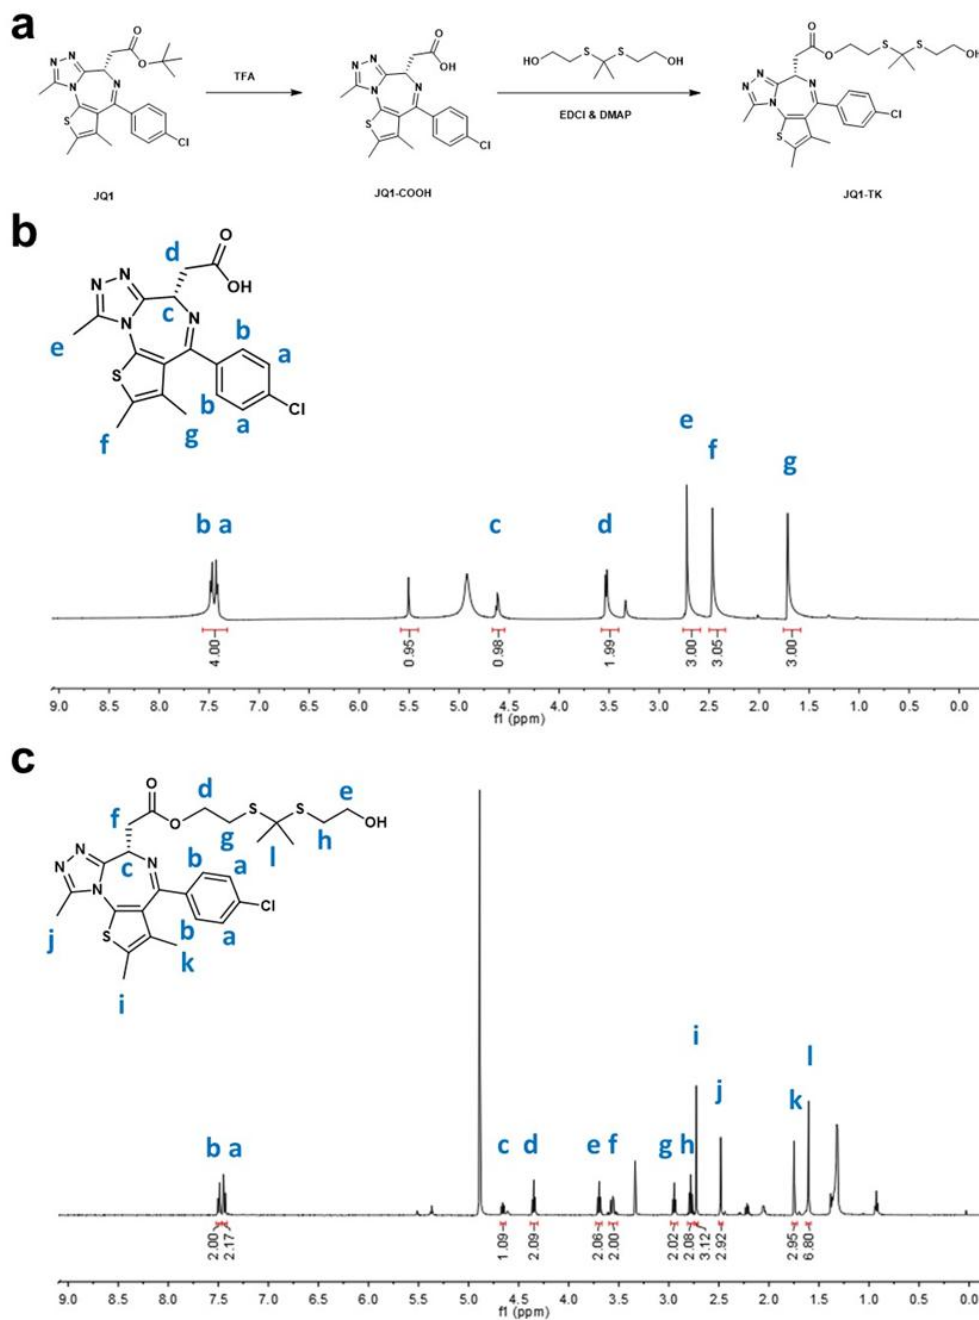

323

324 **Supplementary Figure 35. Synthesis and characterization of JQ1-TK.** (a) The synthetic route of JQ1-TK; (b)

325  $^1\text{H-NMR}$  spectrum of JQ1-COOH. (c)  $^1\text{H-NMR}$  spectrum of JQ1-TK.

326

327

328

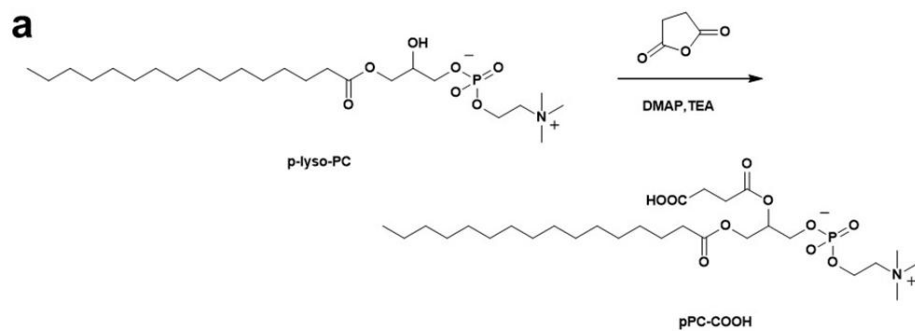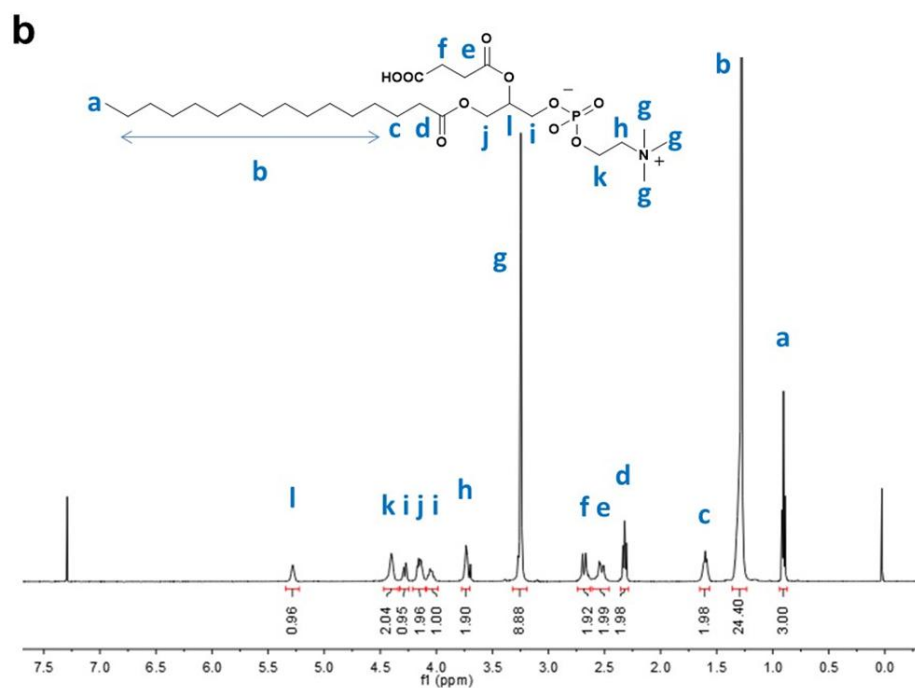

329

330 **Supplementary Figure 36. Synthesis and characterization of pPC-COOH.** (a) The synthetic route of  
 331 pPC-COOH. (b)  $^1\text{H-NMR}$  spectrum of pPC-COOH.



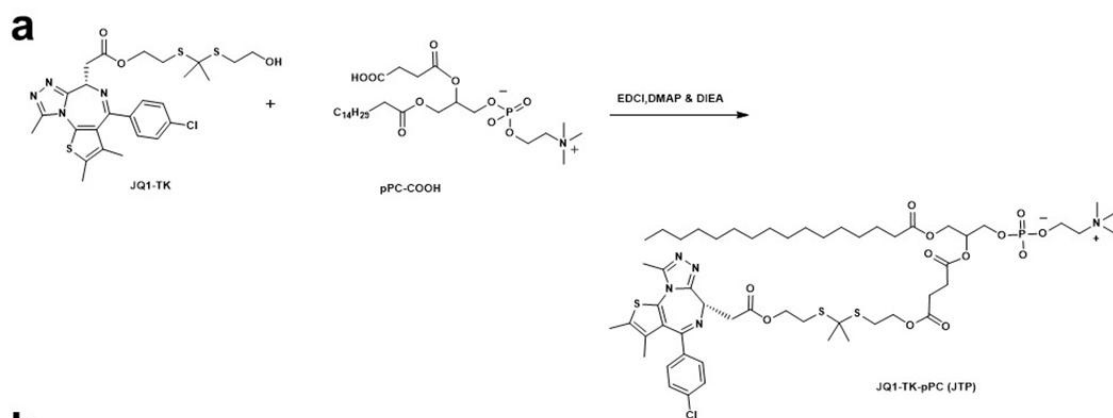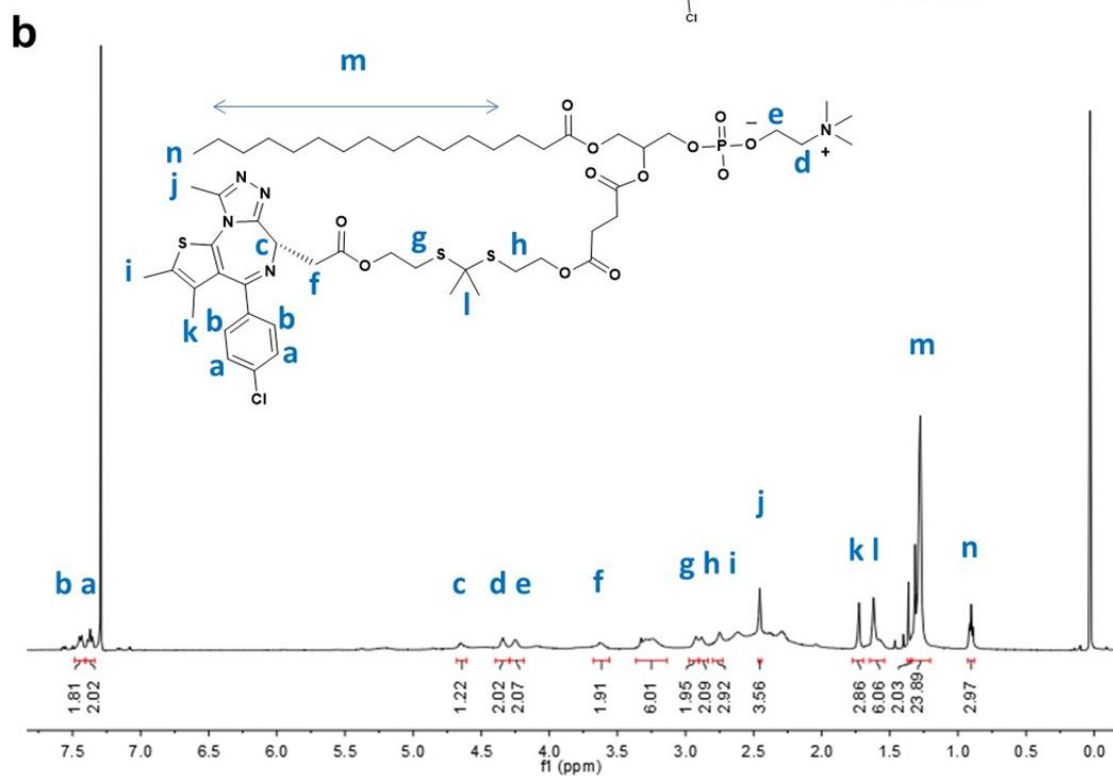

332

333 **Supplementary Figure 37. Synthesis and characterization of JQ1-TK-pPC (JTP).** (a) The synthetic route of

334 JQ1-TK-pPC. (b)  $^1\text{H-NMR}$  spectra of JQ1-TK-pPC.

335

336

337

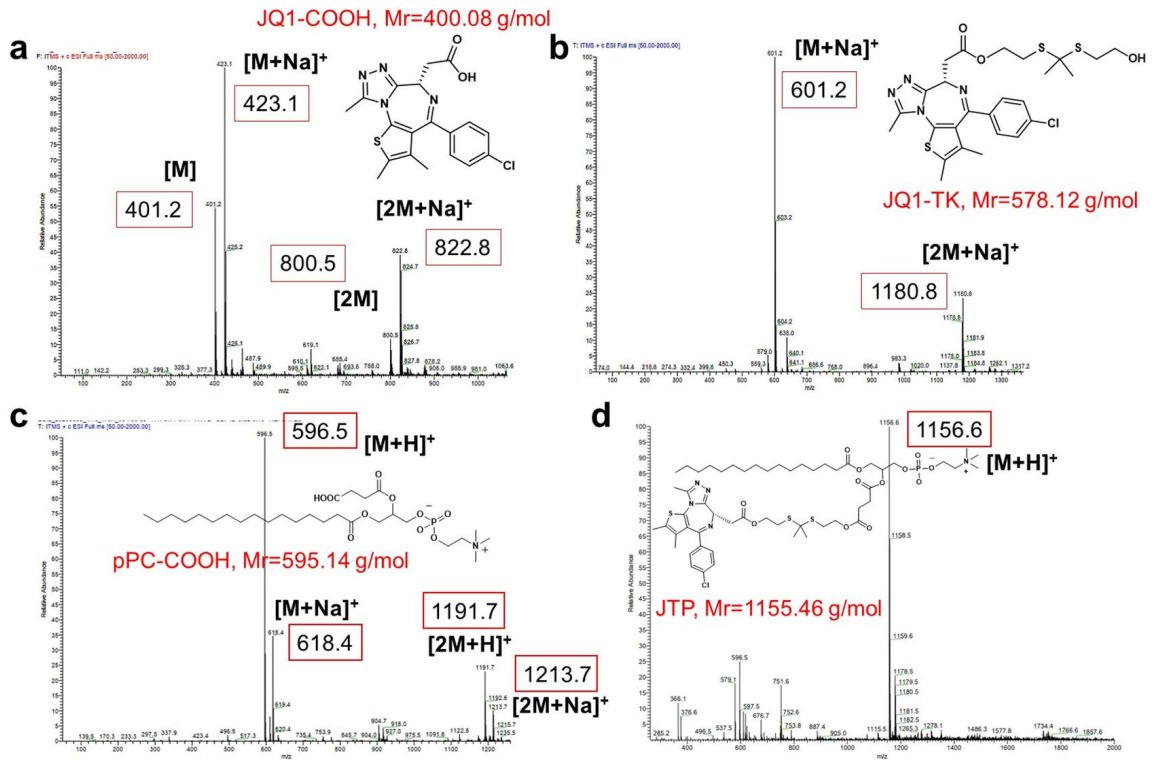

338

339 **Supplementary Figure 38.** (a-d) ESI-MS spectra of JQ1-COOH (C<sub>19</sub>H<sub>17</sub>ClN<sub>4</sub>O<sub>2</sub>S) (a), JQ1-TK (C<sub>26</sub>H<sub>31</sub>ClN<sub>4</sub>O<sub>3</sub>S<sub>3</sub>)

340 (b), pPC-COOH (C<sub>28</sub>H<sub>54</sub>NO<sub>10</sub>P) (c), and JTP (C<sub>54</sub>H<sub>83</sub>ClN<sub>5</sub>O<sub>12</sub>PS<sub>3</sub>) (d).

341

342

343

344

345

346

347

348

349

350

351

352

353

354

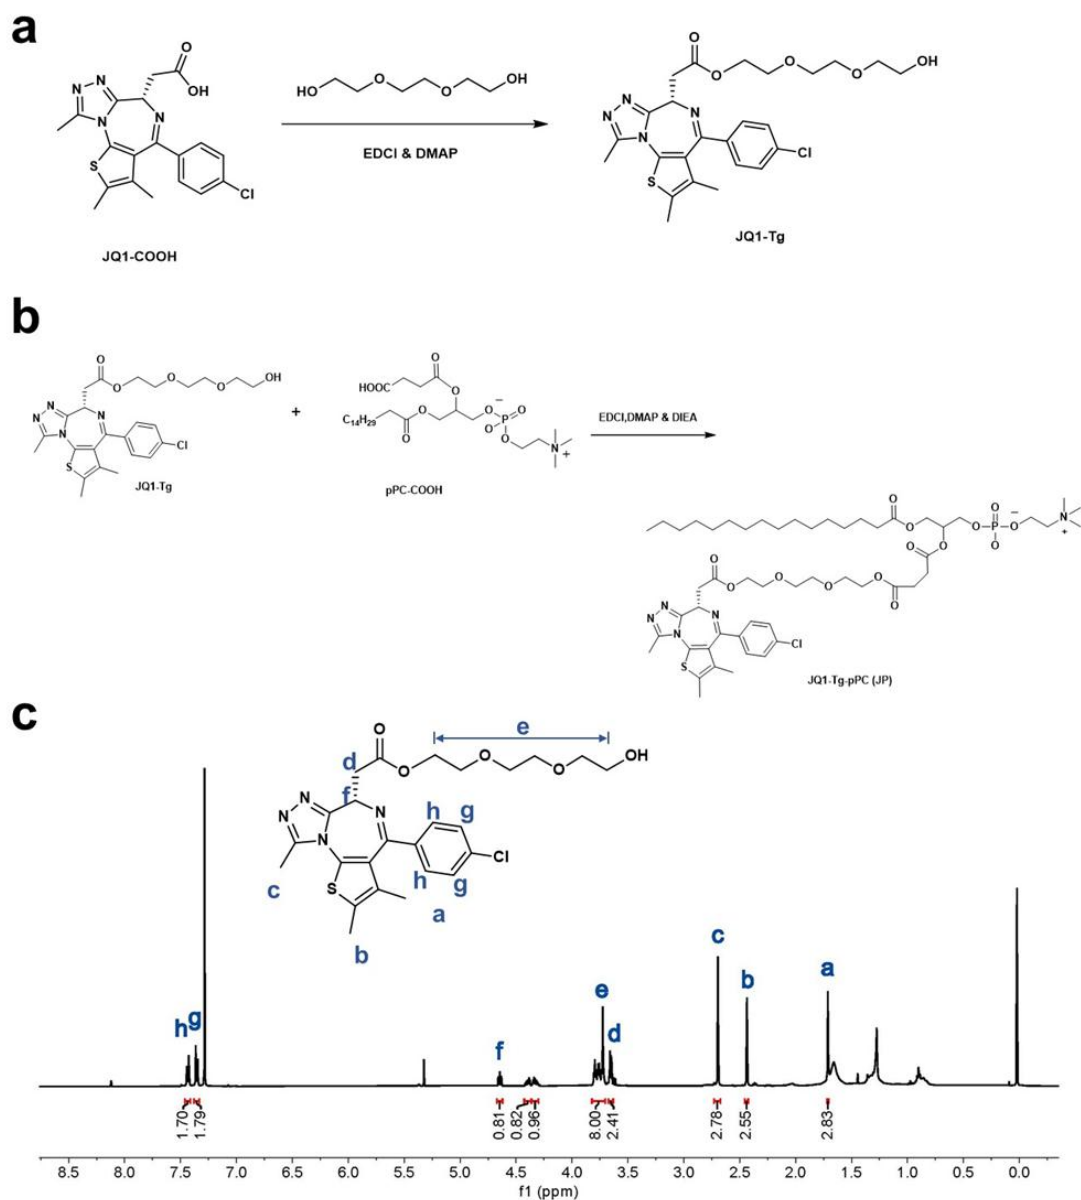

355

356 **Supplementary Figure 39.** (a-c) The synthetic route of JQ1-Tg (a), and JQ1-Tg-pPC (JP) (b), <sup>1</sup>H-NMR spectra of

357 JQ1-Tg (c).

358

359

360

361

362

363

364

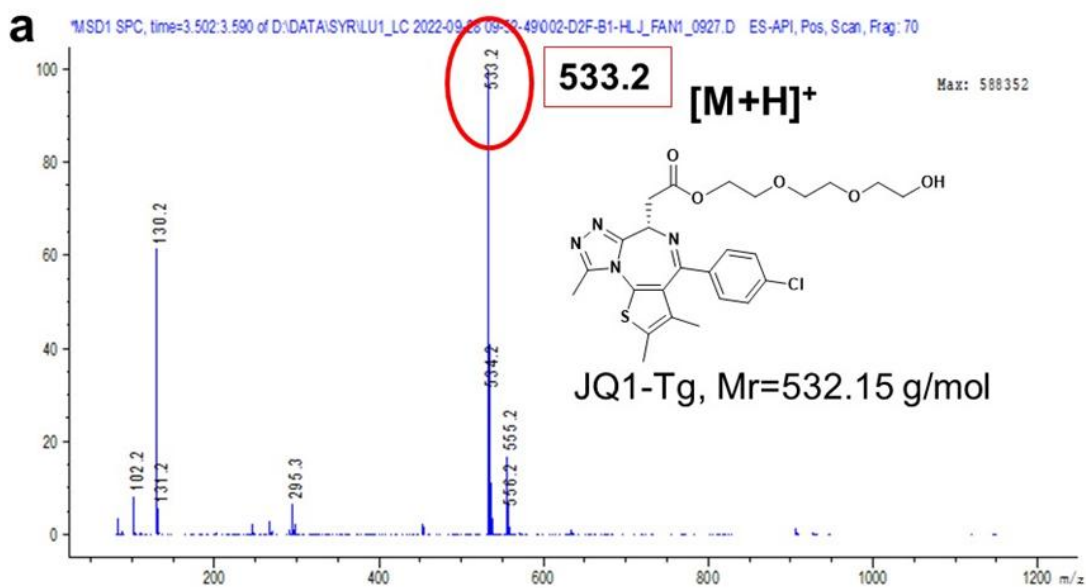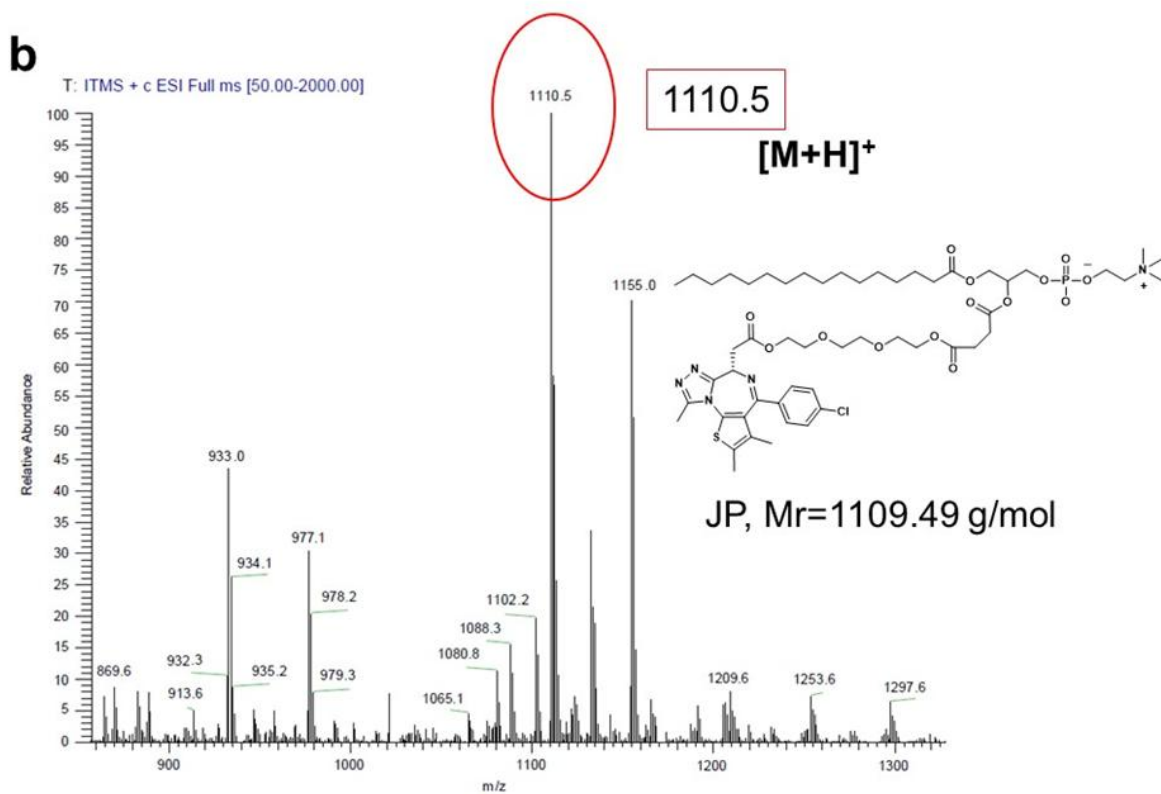

365

366

**Supplementary Figure 40. (a and b) Mass spectra of JQ1-Tg (a) and JQ1-Tg-pPC (JP) (b).**

367

368

369

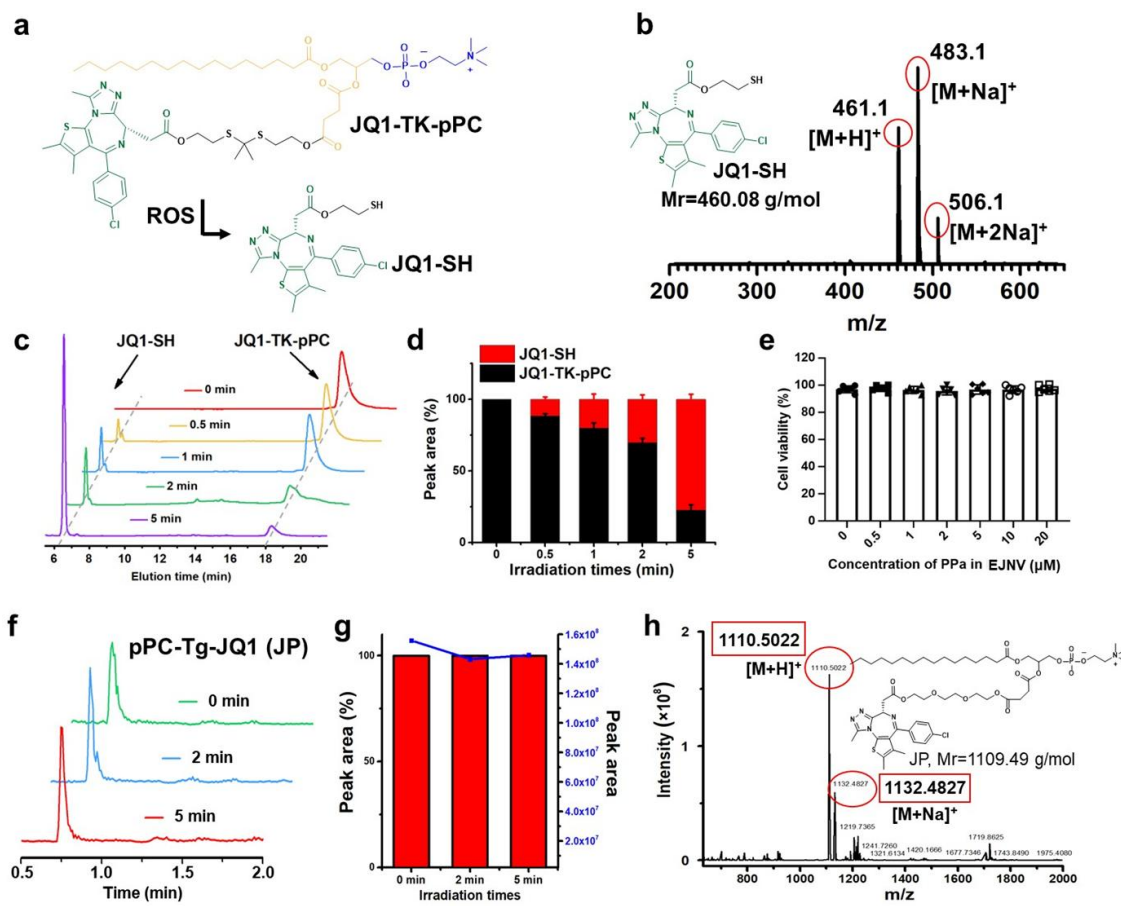

370

371 **Supplementary Figure 41. ROS-responsive break behavior of pPC-TK-JQ1.** (a) Reaction mechanism of  
 372 ROS-triggered activation of the pPC-TK-JQ1 prodrug. (b) ESI-MS spectra of JQ1-SH release from JTP. (c)  
 373 time course total ions chromatogram (TIC) curves of pPC-TK-JQ1 activation kinetics. (d) PDT-induced JQ1 release  
 374 profile of the pPC-TK-JQ1 prodrug (mean ± SD, n = 3 independent experiments). (e) Cell viability of EJNV  
 375 4T1 cells *in vitro* (mean ± SD, n = 6 biologically independent cells). (f) Time course total ions chromatogram (TIC)  
 376 curves of pPC-Tg-JQ1 (JP) inactivation kinetics. (g) Peak area and percent peak area of JP from (f). (h) ESI-MS  
 377 spectra of JP at 5 min after PDT treatment.

378

379

380

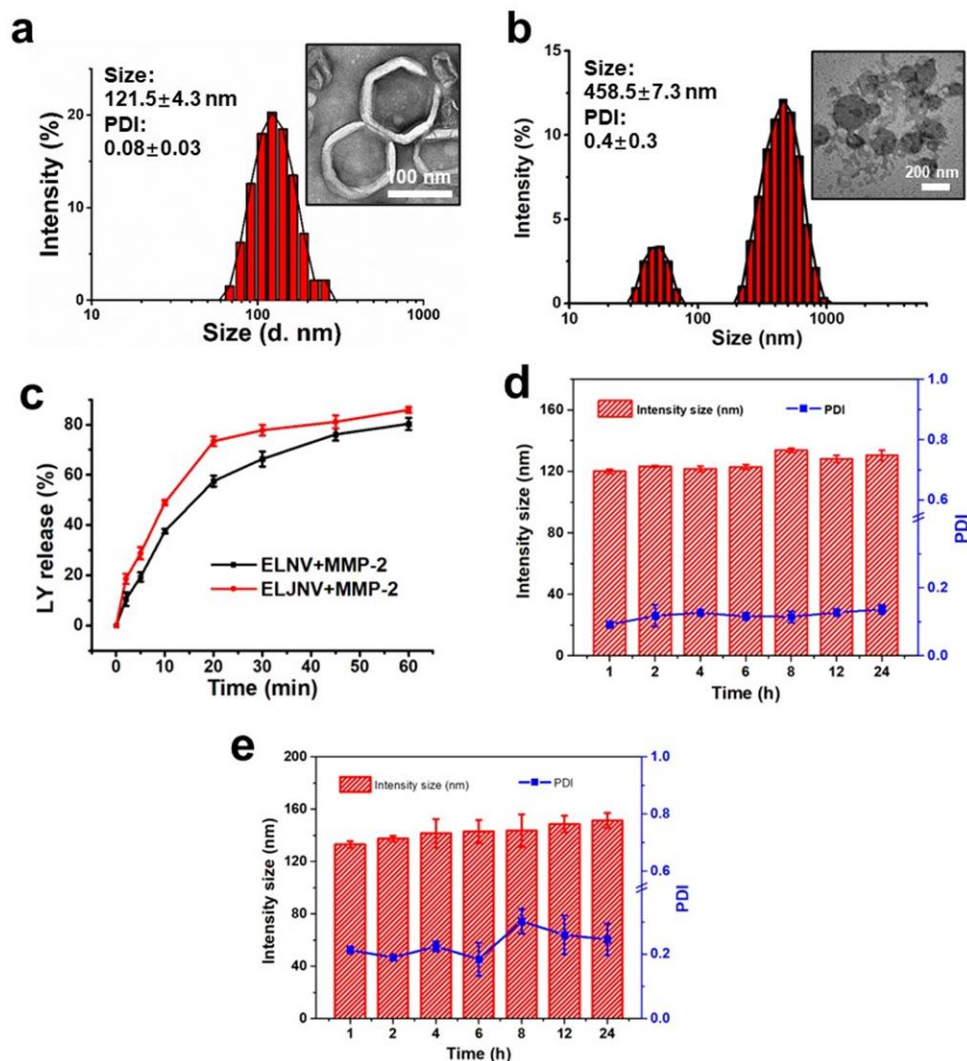

381

382 **Supplementary Figure 42. Construction of ELJNV nanovesicles.** (a) Hydrodynamic diameters and the  
 383 representative TEM images of ELJNV. (b) Hydrodynamic diameters and the representative TEM images of ELJNV  
 384 upon 4 h incubation with MMP-2 (40  $\mu$ g/mL). (c) LY release profiles of ELNV and ELJNV nanovesicles in the  
 385 presence of MMP-2 (40  $\mu$ g/mL) (n = 3 independent experiments). (d) DLS-determined colloidal stability of  
 386 ELJNV nanovesicle in 10% FBS-containing phosphate buffer solution (n = 3 independent experiments). (e)  
 387 DLS-determined stability of the ELJNV nanovesicle in whole blood serum of mouse (n = 3 independent  
 388 experiments). All data are presented as mean  $\pm$  SD.

389

390

391

392

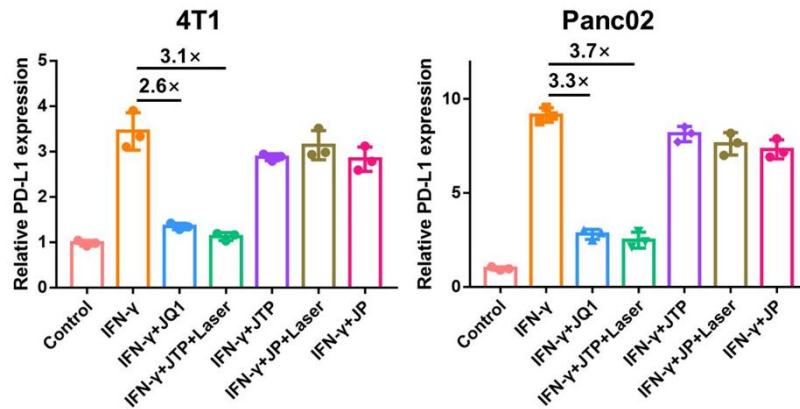

393

394 **Supplementary Figure 43.** PD-L1 expression of flow cytometry data of relative PD-L1 expression on the surface  
 395 of 4T1 or Panc02 tumor cells upon different treatment conditions *in vitro* (mean  $\pm$  SD, n = 3 biologically  
 396 independent cells).

397

398

399

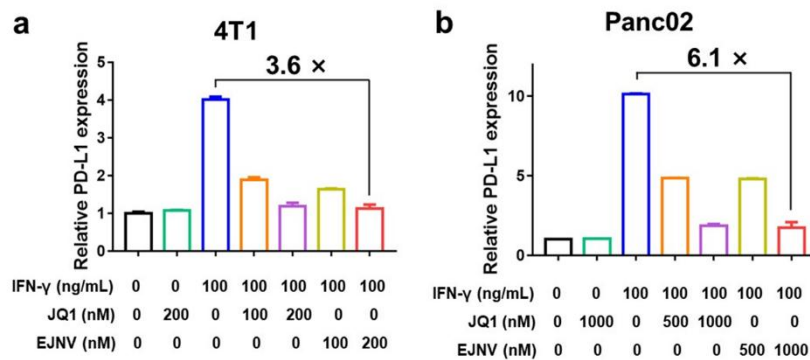

400

401 **Supplementary Figure 44.** EJNV nanovesicles block IFN- $\gamma$  induced PD-L1 expression *in vitro*. Flow cytometry  
 402 data of relative PD-L1 expression on the surface of **a** 4T1 or **b** Panc02 tumor cells upon different treatments *in vitro*  
 403 (mean  $\pm$  SD, n = 3 biologically independent cells).

404

405

406

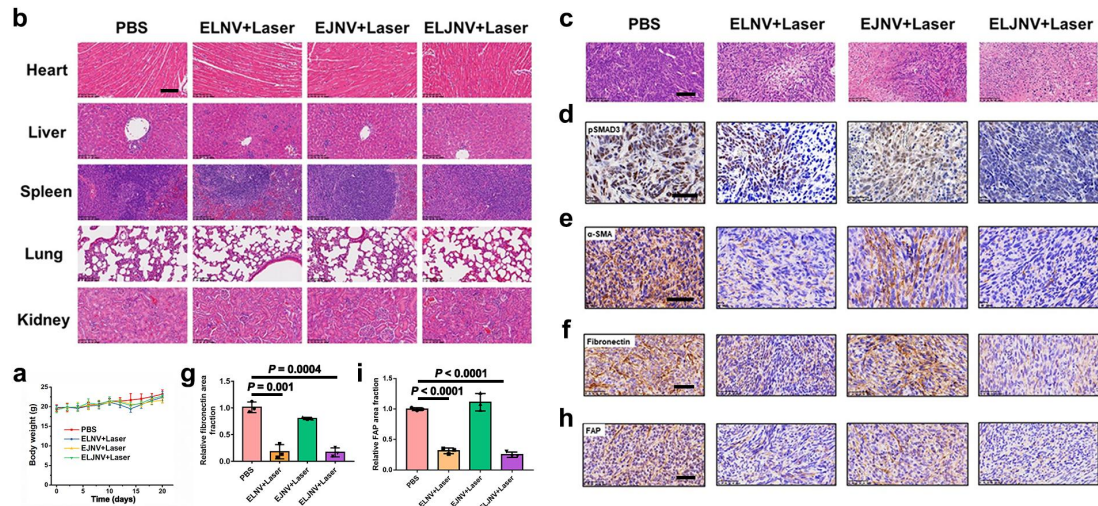

407

408

409

410

411

412

413

414

415

416

417

418

419

420

**Supplementary Figure 45. H&E and immunohistochemical staining images of normal or tumor tissues after different treatments.** (a) Averaged body weight of mice under different conditions (mean ± SD, n = 6 mice). (b) H&E-stained sections of the heart, liver, spleen, lung, and kidney of 4T1 tumor-bearing mice with different treatments (n = 3 mice, Scale bar = 100 μm). (c-f) H&E staining images (c), the immunohistochemical staining of pSmad3 (d), α-SMA (e), and fibronectin (f) of the excised tumors from each group after the treatments, respectively. Scale bars = 100 μm (c), Scale bars = 50 μm (d-f) (n = 3 mice). (g) Semi-quantitative of fibronectin area by image J. (mean ± SD, n = 3 mice). (h) The immunohistochemical staining of FAP of the excised tumors from each group after the treatments. Scale bars = 50 μm (n = 3 mice). (i) Semi-quantitative of FAP area by image J (mean ± SD, n = 3 mice,  $P = 2.28 \times 10^{-5}$  and  $1.28 \times 10^{-5}$ ). *P* values derived from the Student's *t*-test (two-tailed, two-sample unequal variance). The experiment was repeated independently 3 times with similar results in **b-f, h**.



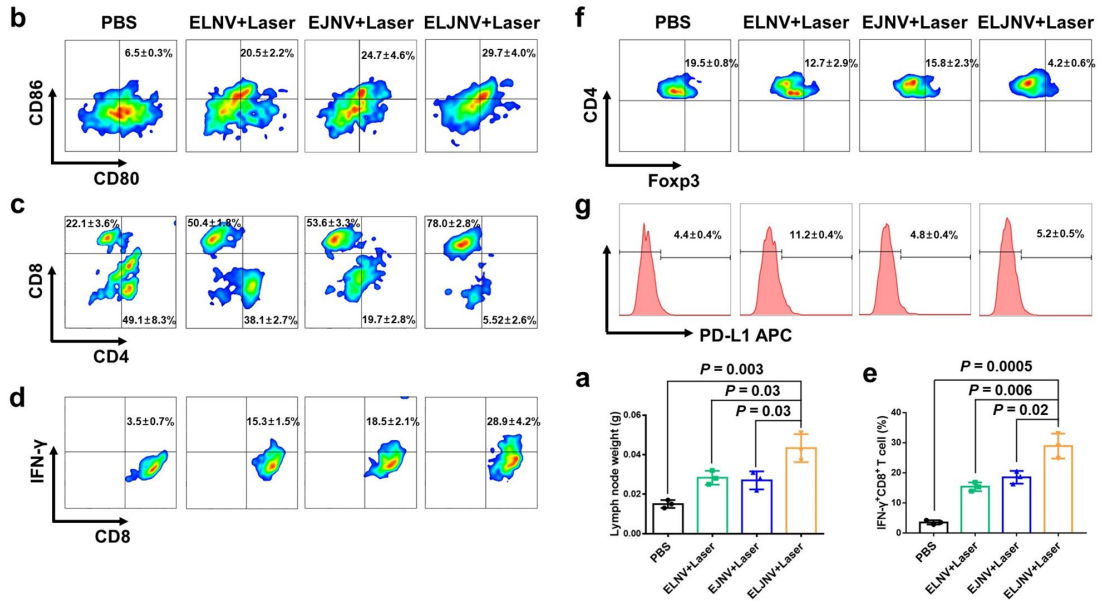

421

422 **Supplementary Figure 46. Immunologic evaluations after different treatments.** (a) The weight of lymph nodes  
 423 of 4T1 tumor-bearing mice at the end of treatments (mean ± SD, n = 3 mice). (b) The frequency of matured DCs  
 424 (CD11c<sup>+</sup>CD80<sup>+</sup>CD86<sup>+</sup>) in the tumor-draining LNs of 4T1 tumor (mean ± SD, n = 3). (c) Flow cytometric  
 425 quantification of intratumoral infiltration of CD4<sup>+</sup> and CD8<sup>+</sup> T cells in 4T1 tumor model (mean ± SD, n = 3). (d-f)  
 426 Flow cytometric quantification of (d and e) intratumoral infiltration of IFN-γ<sup>+</sup>CD8<sup>+</sup> T cells (CD3<sup>+</sup>CD8<sup>+</sup>IFN-γ<sup>+</sup>), and  
 427 (f) Tregs (CD3<sup>+</sup>CD4<sup>+</sup>Foxp3<sup>+</sup>) in 4T1 tumor model (mean ± SD, n = 3 mice). (g) Flow cytometric quantification of  
 428 PD-L1 expression in 4T1 tumor model. *P* values derived from the Student's *t*-test (two-tailed, two-sample unequal  
 429 variance).

430

431

432

433

434

435

436

437

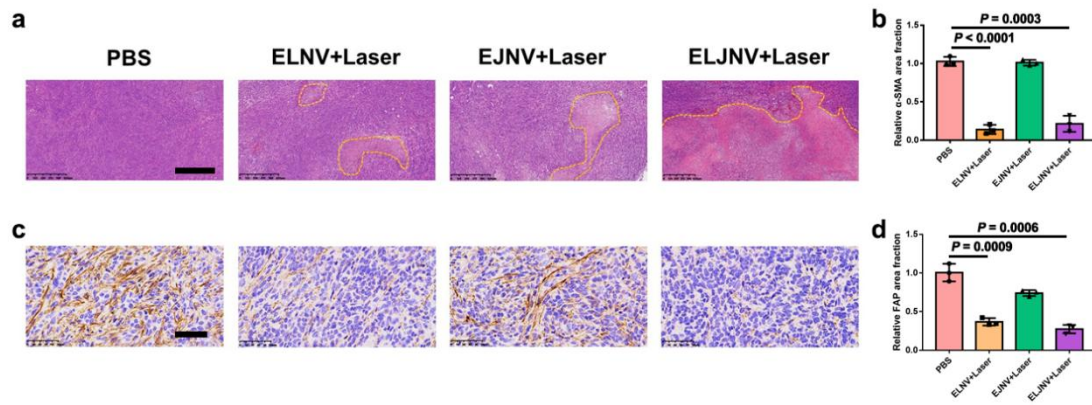

438

439

440

441

442

443

444

445

446

447

448

449

450

451

452

453

**Supplementary Figure 47. H&E staining images of tumor tissues and FAP expression of tumor tissues after different treatments.** (a) H&E staining of the tumor slices from different groups as indicated (Scale bars = 625  $\mu$ m). Yellow circles highlight the regions of tumor necrotic. (b) Semi-quantitative of  $\alpha$ -SMA area in Fig. 6i by Image J (mean  $\pm$  SD, n = 3 mice,  $P = 5.60 \times 10^{-5}$  and  $3.06 \times 10^{-4}$ ). (c) The immunohistochemical staining of FAP of the excised tumors from each group after the treatments. Scale bars = 50  $\mu$ m. (d) Semi-quantitative of FAP area by image J (mean  $\pm$  SD, n = 3 mice).  $P$  values derived from the Student's  $t$ -test (two-tailed, two-sample unequal variance).

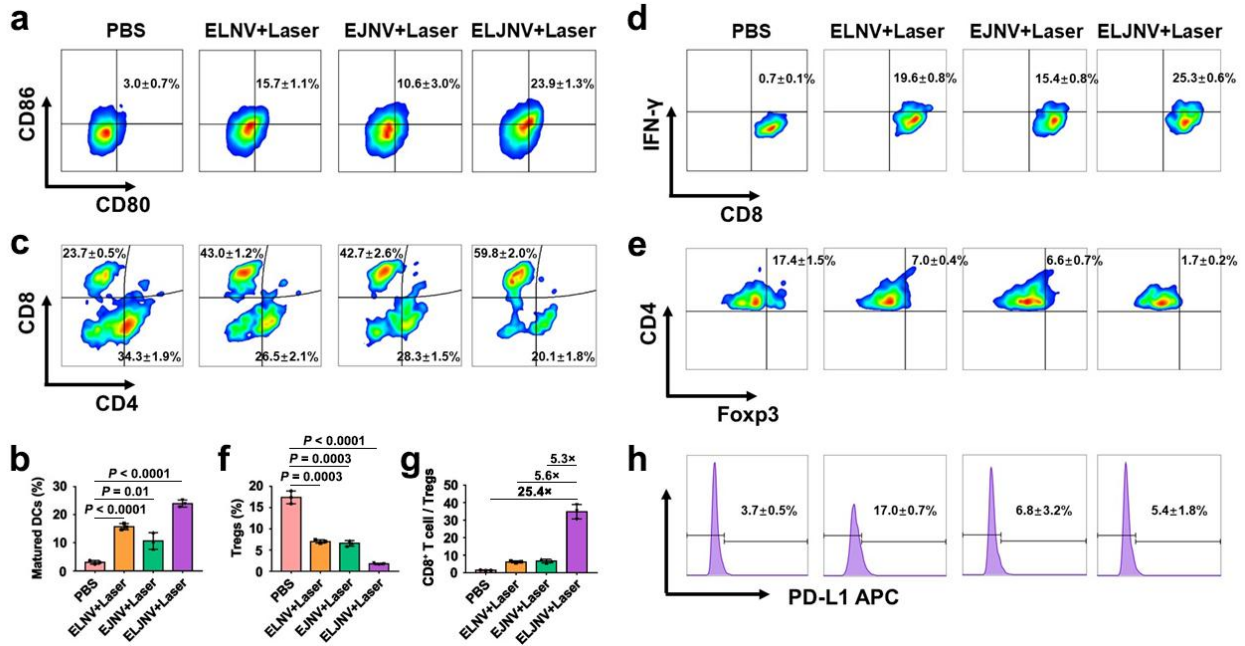

454

455 **Supplementary Figure 48. Immunologic evaluation after different treatments.** (a and b) The frequency of

456 matured DCs (CD11c<sup>+</sup>CD80<sup>+</sup>CD86<sup>+</sup>) in the tumor-draining LNs of Panc02 tumor ( $P = 6.79 \times 10^{-5}$ ,  $1.22 \times 10^{-2}$  and

457  $1.37 \times 10^{-5}$ ). (c) Flow cytometric quantification of tumor-infiltrating CD4<sup>+</sup> and CD8<sup>+</sup> T cells in Panc02 tumor model.

458 (d-f) Flow cytometric quantification of (d) tumor-infiltrating IFN-γ<sup>+</sup>CD8<sup>+</sup> T cells (CD3<sup>+</sup>CD8<sup>+</sup>IFN-γ<sup>+</sup>), and (e and f)

459 Tregs (CD3<sup>+</sup>CD4<sup>+</sup>Foxp3<sup>+</sup>) in the Panc02 tumor model *in vivo* ( $P = 3.15 \times 10^{-4}$ ,  $3.29 \times 10^{-4}$  and  $5.60 \times 10^{-5}$ ). (g) CD8<sup>+</sup> T

460 cell-to-Treg ratio in Panc02 tumor-bearing mice. (h) Flow cytometric quantification of PD-L1 expression on the

461 surface of the Panc02 tumor cells *in vivo*. All data are presented as mean ± SD. n = 3 mice. *P* values derived from

462 the Student's *t*-test (two-tailed, two-sample unequal variance).

463

464

465

466

467

468

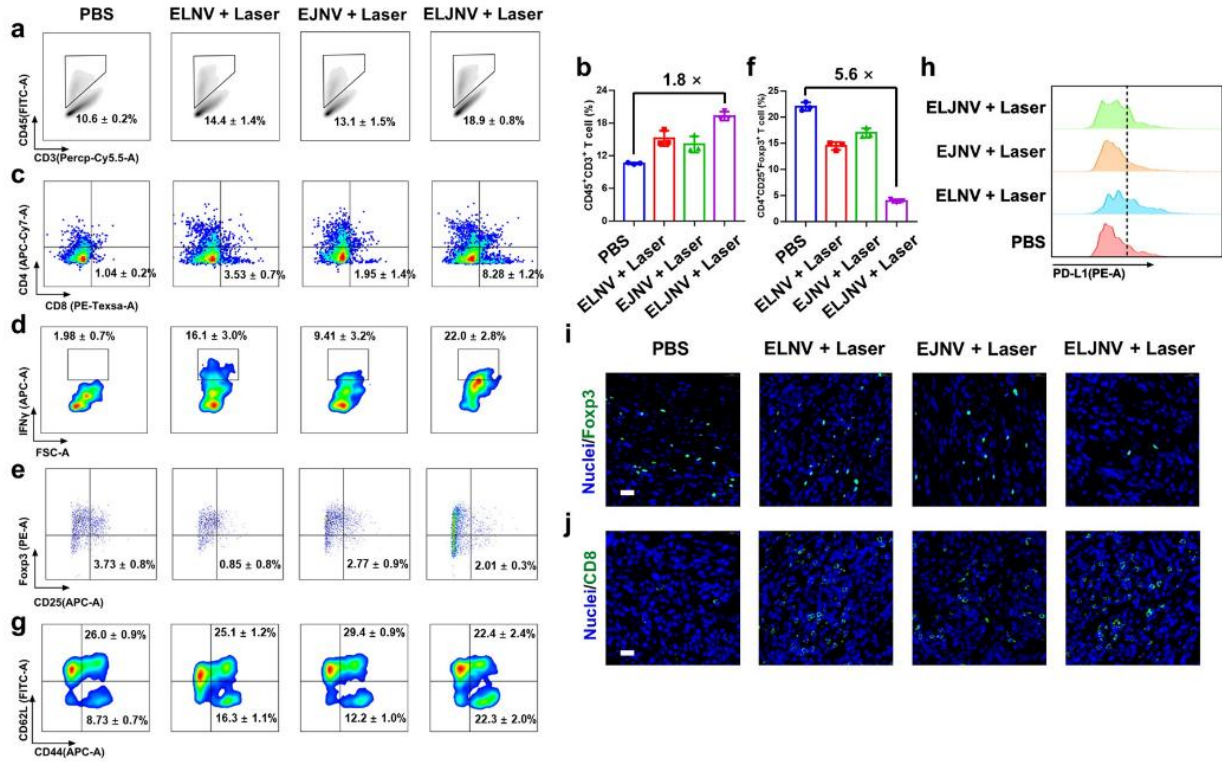

469

470 **Supplementary Figure 49.** (a and b) Representative flow cytometry plots (a), and quantification of  
 471 tumor-infiltrating CD3<sup>+</sup> T cells (CD45<sup>+</sup>CD3<sup>+</sup>) (b) in KPC tumor model. (c) Flow cytometry plots of CD4<sup>+</sup> T cells  
 472 (CD45<sup>+</sup>CD3<sup>+</sup>CD4<sup>+</sup>) and CD8<sup>+</sup> T cells (CD45<sup>+</sup>CD3<sup>+</sup>CD8<sup>+</sup>). (d) Representative flow cytometry plots of IFN- $\gamma$ <sup>+</sup>CD8<sup>+</sup>  
 473 T cells (CD45<sup>+</sup>CD3<sup>+</sup>CD8<sup>+</sup>IFN- $\gamma$ <sup>+</sup>). (e and f) Representative flow cytometry plots (e), and quantification of  
 474 tumor-infiltrating Tregs (CD45<sup>+</sup>CD3<sup>+</sup>CD4<sup>+</sup>CD25<sup>+</sup>Foxp3<sup>+</sup>) (f) in KPC tumor model. (g) Flow cytometric  
 475 quantification of T<sub>CM</sub> (CD45<sup>+</sup>CD3<sup>+</sup>CD8<sup>+</sup>CD44<sup>+</sup>CD62L<sup>+</sup>) and T<sub>EM</sub> (CD45<sup>+</sup>CD3<sup>+</sup>CD8<sup>+</sup>CD44<sup>+</sup>CD62L<sup>-</sup>) in the spleens  
 476 of KPC tumor-bearing C57BL/6 mice post-21-days treatment. (h) Flow cytometry analysis of intratumoral PD-L1  
 477 expression in KPC tumors after different treatments. (i and j) IF staining of tumor-infiltrating Tregs (i), and CD8<sup>+</sup> T  
 478 cells (j) in KPC tumor sections upon different treatments. Scale bar = 20  $\mu$ m. All data are presented as mean  $\pm$  SD.  
 479 n = 3 mice.

480

481

482

483

484

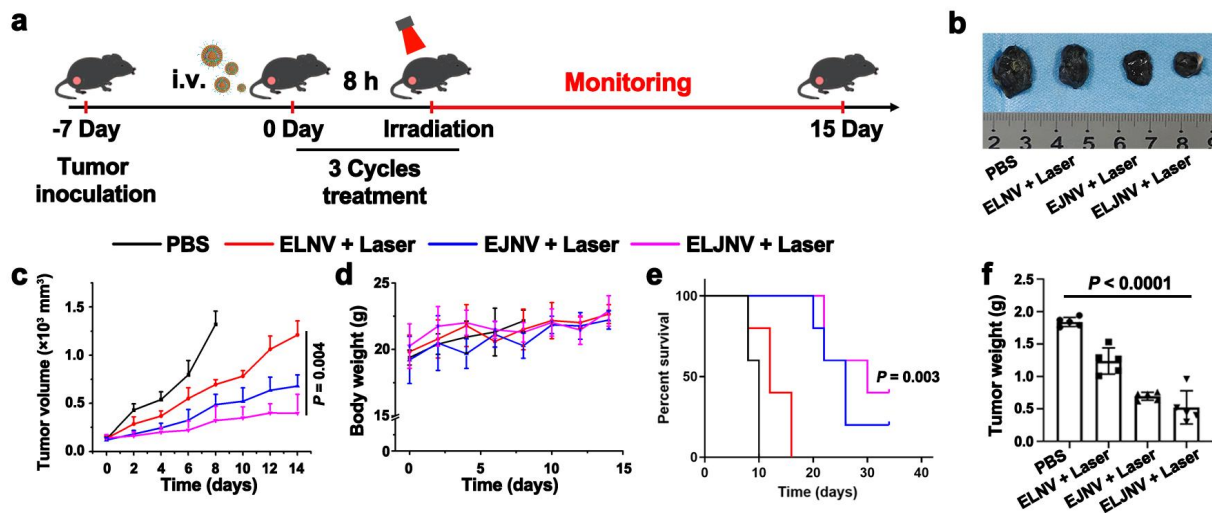

485

486 **Supplementary Figure 50.** (a) Treatment schedule of ELJNV-mediated combination immunotherapy of B16-F10  
 487 melanoma tumor model. (b) Representative photographs of tumor tissues at the end of the antitumor study. (c)  
 488 Growth profiles of B16-F10 tumor upon different treatments. (d) Body weight change curves, and (e) Survival  
 489 curves of B16-F10 tumor-bearing mice upon different treatments. (f) Averaged tumor weight was examined at the  
 490 end of the antitumor study ( $P = 3.95 \times 10^{-6}$ ). All data are presented as mean  $\pm$  SD.  $n = 5$  mice.  $P$  value derived from  
 491 the Student's  $t$ -test (two-tailed, two-sample unequal variance).

492

493

494

495

496

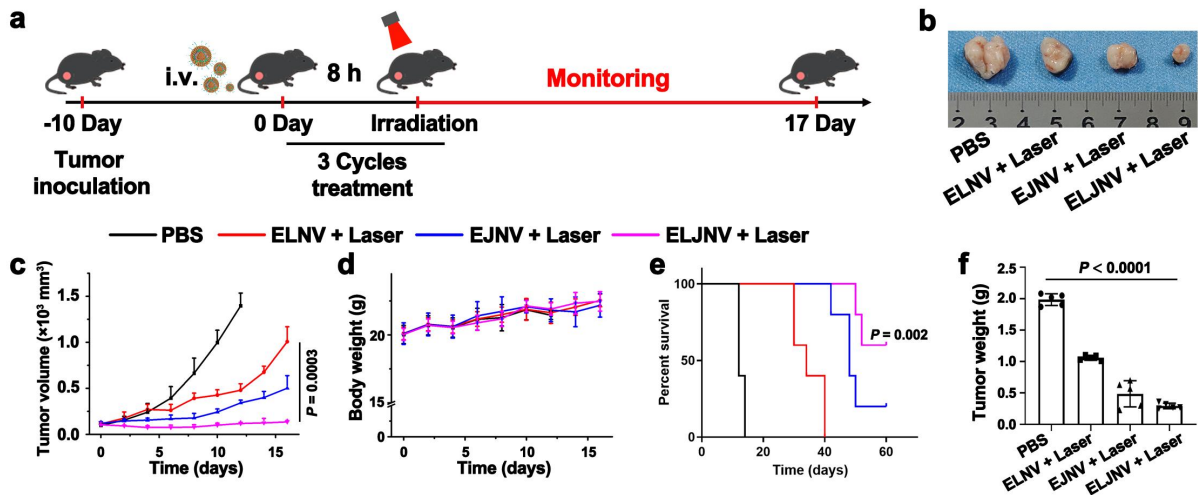

497

498 **Supplementary Figure 51.** (a) Treatment schedule of ELJNV-mediated combination immunotherapy of MC38  
 499 colorectal tumor model. (b) Representative photographs of MC38 tumors were collected at the end of the antitumor  
 500 study. (c) Growth profiles of MC38 tumor upon different treatments. (d) Body weight change curves, and (e)  
 501 Survival curves of MC38 tumor-bearing mice upon different treatments. (f) Averaged tumor weight was examined  
 502 at the end of the antitumor study ( $P = 3.53 \times 10^{-10}$ ). All data are presented as mean  $\pm$  SD.  $n = 5$  mice.  $P$  value derived  
 503 from the Student's  $t$ -test (two-tailed, two-sample unequal variance).

504

505

506

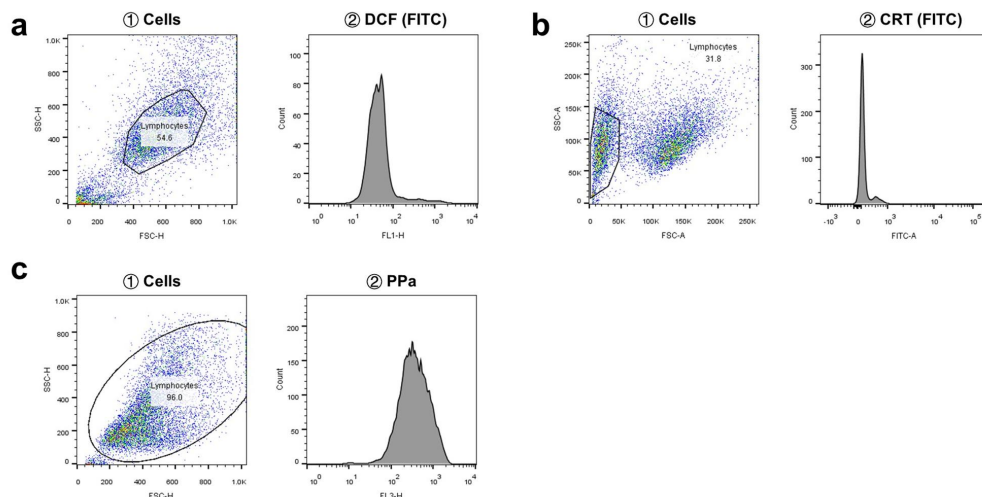

507

508 **Supplementary Figure 52.** The gating strategies of flow cytometry analyses for (a) ROS generation (related to Fig.  
 509 3h, Supplementary Figs. 24b, c and 25); (b) CRT positive cells (related to Fig. 3i, Supplementary Figs. 26b, 27b, d)  
 510 and (c) cellular uptake (related to Fig. 3f).

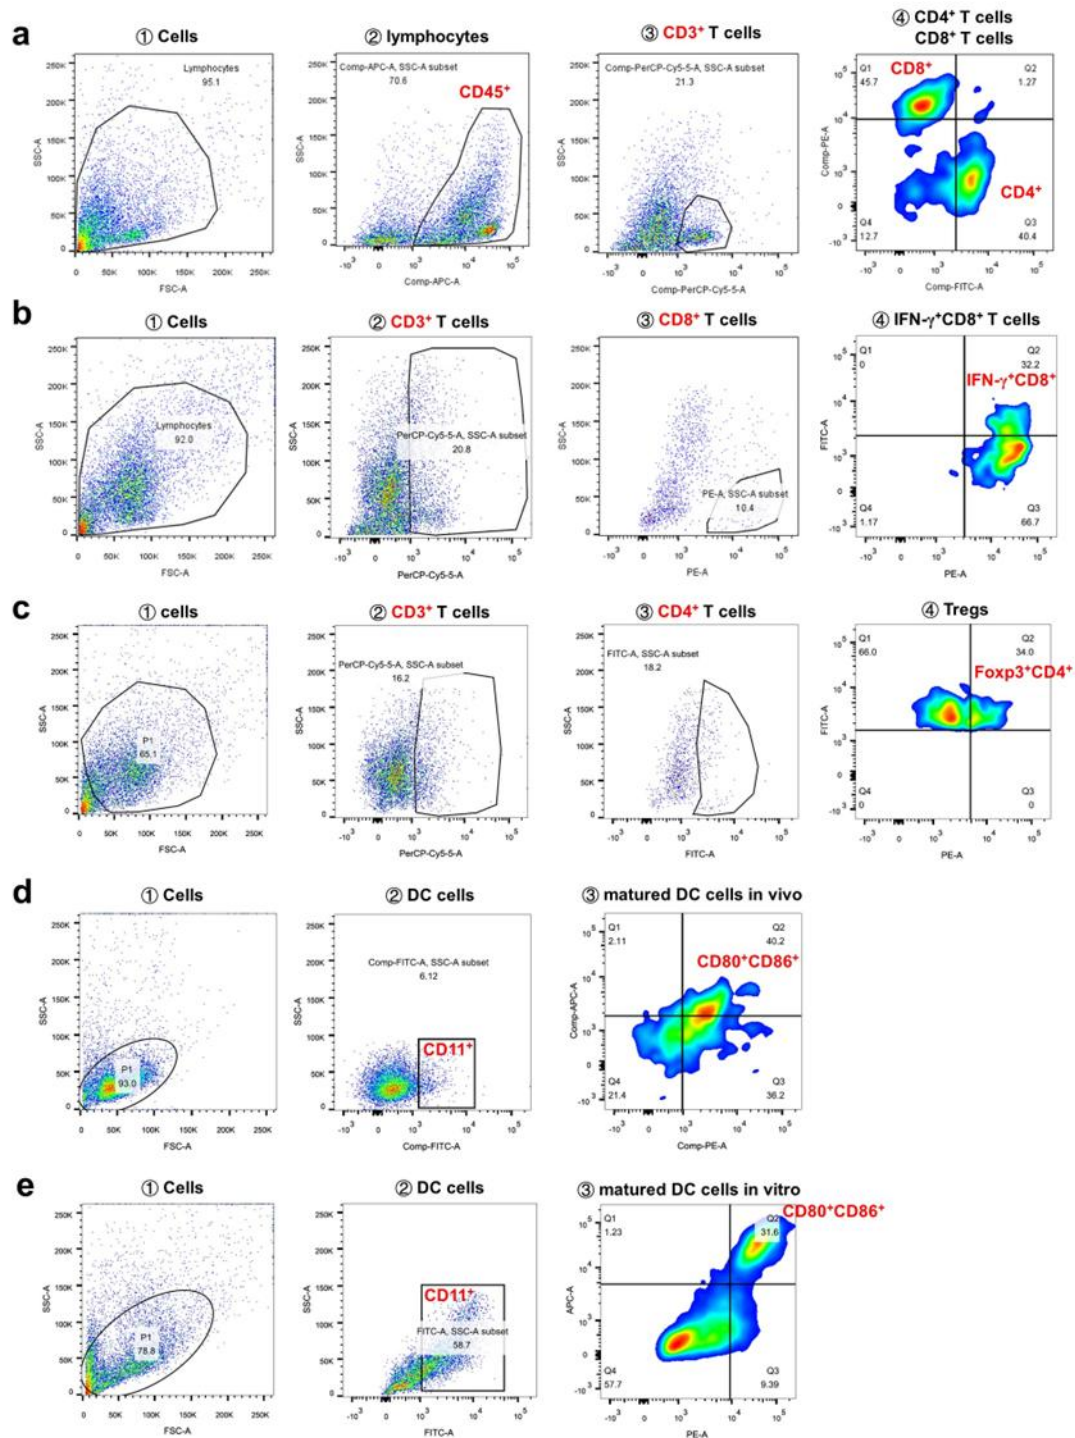

511

512 **Supplementary Figure 53.** The gating strategies of flow cytometry analyses in **Figs. 3k, 4-6** and **Supplementary**

513 **Figs. 26c, 28, 34, 46, 48.** (a)  $CD3^+CD4^+CD8^+$  T cells; (b)  $IFN-\gamma^+CD8^+$  T cells; (c) Tregs; (d) matured DCs in vivo;

514 (e) matured DCs in vitro.

515

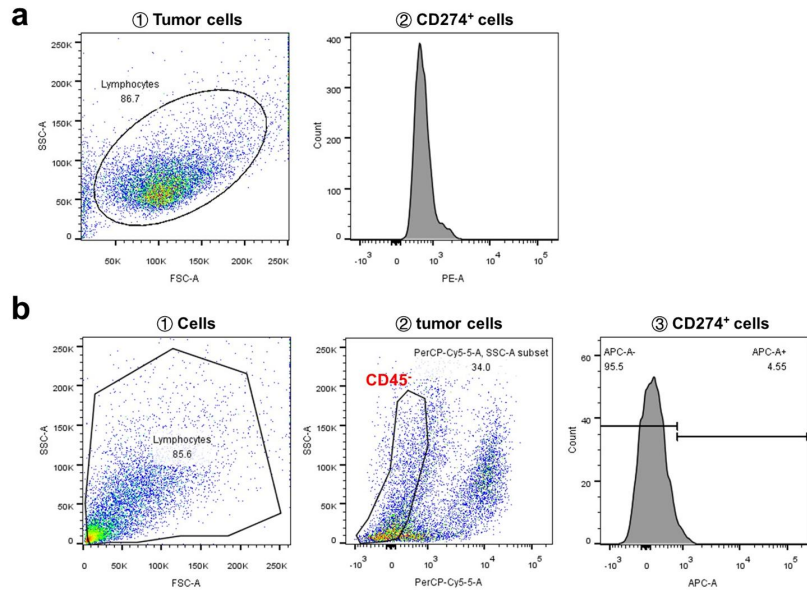

516

517 **Supplementary Figure 54.** The gating strategies of flow cytometry analyses for PD-L1 expression on the surface  
 518 of tumor cells (a) in vitro (related to Supplementary Figs. 43, 44) and (b) in vivo (related to Figs. 4-6 and  
 519 **Supplementary Figs. 34, 46, 48).**



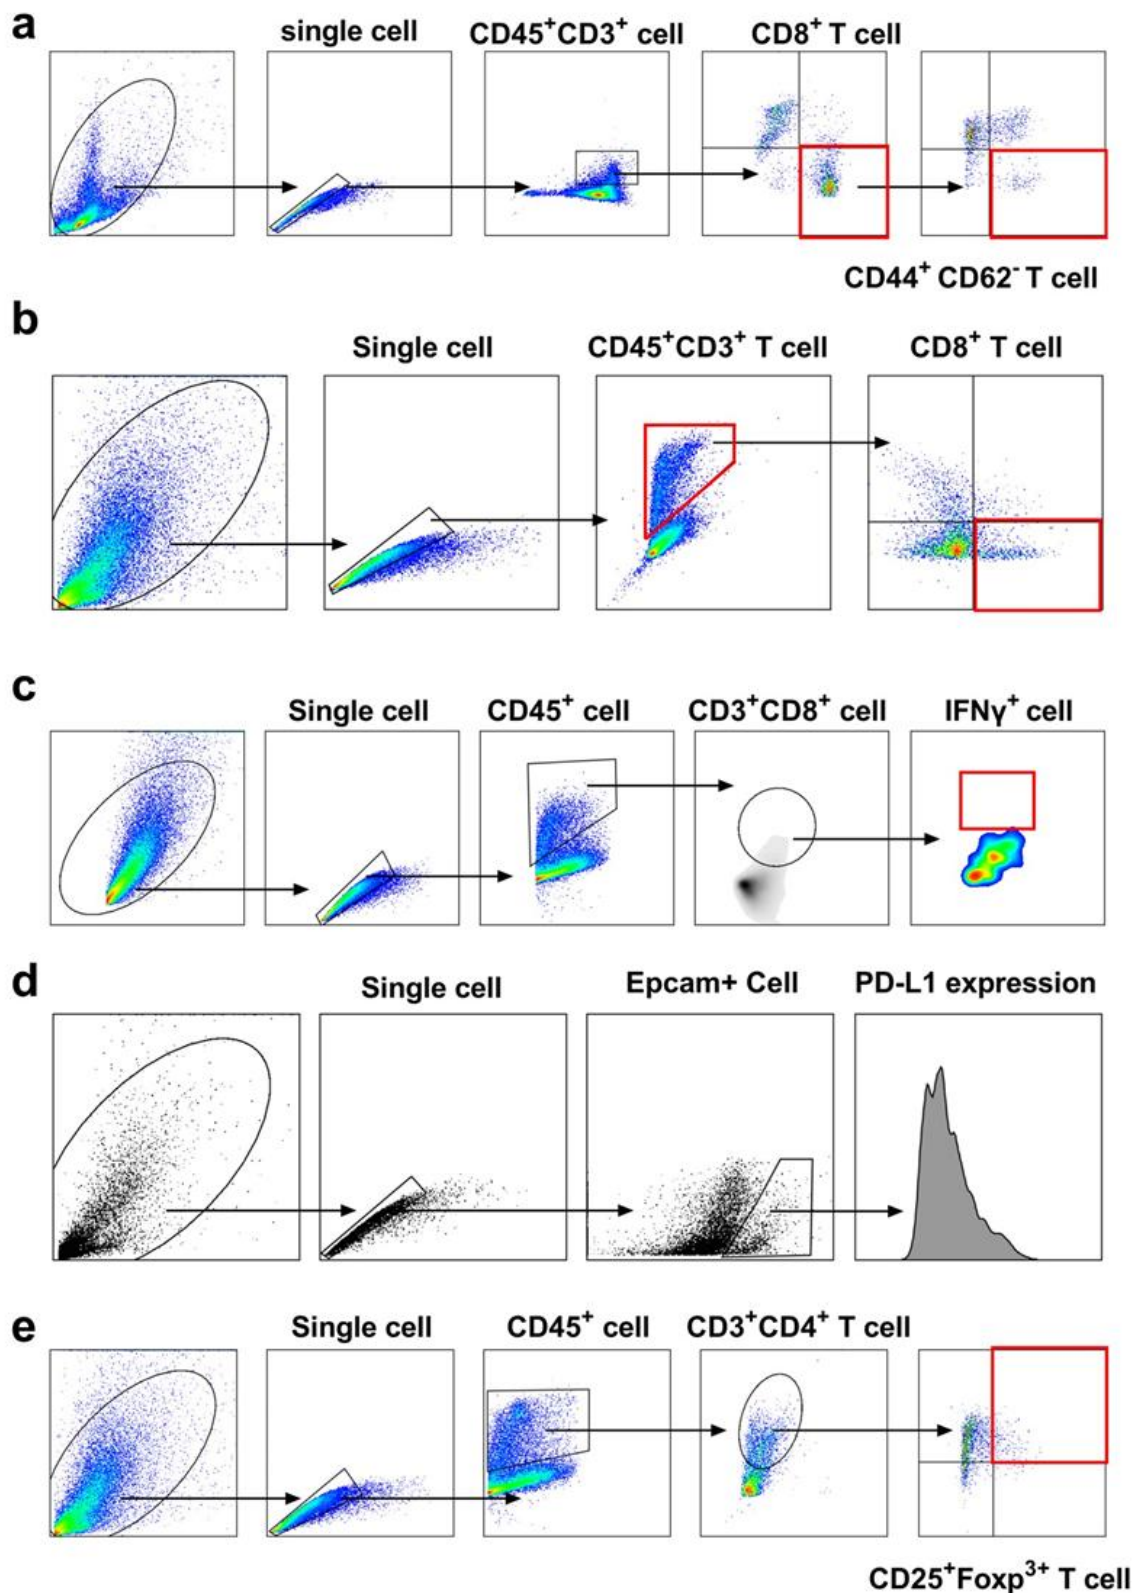

520

521 **Supplementary Figure 55.** The gating strategies of flow cytometry analyses in Fig. 7 and Supplementary Fig. 49.

522 (a) CD62L<sup>-</sup>CD44<sup>+</sup> effector memory CD8<sup>+</sup> T cells in the spleens of mice; (b) CD3<sup>+</sup>CD4<sup>+</sup>CD8<sup>+</sup> T cells; (c)

523 IFN- $\gamma$ <sup>+</sup>CD8<sup>+</sup>T cells; (d) PD-L1<sup>+</sup> tumor cells; (e) Tregs.

524 **Supplementary Table 1.** A list of abbreviations used in the context.

| Abbreviation  | Full name                                                     | Abbreviation      | Full name                                                                |
|---------------|---------------------------------------------------------------|-------------------|--------------------------------------------------------------------------|
| $\alpha$ -SMA | alpha-smooth muscle actin                                     | AUC               | area under the time-concentration curve                                  |
| BCA           | Bicinchoninic Acid                                            | BMDCs             | bone marrow dendritic cells                                              |
| BRD4          | Bromodomain-containing protein 4                              | CAFs              | Cancer-associated fibroblasts                                            |
| CAR-T         | chimeric antigen receptor T-cell immunotherapy                | CLSM              | Confocal laser-scanning microscopy                                       |
| CRT           | calreticulin                                                  | CTLs              | Cytotoxic T lymphocytes                                                  |
| CVF           | collagen volume fraction                                      | DAPI              | 4',6-diamidino-2-phenylindole dihydrochloride                            |
| DCs           | Dendritic cells                                               | DCFH-DA           | 2',7'-dichlorofluorescein diacetate                                      |
| DCM           | dichloromethane                                               | DIEA              | N,N-Diisopropylethylamine                                                |
| DL%           | drug loading ratio                                            | DLS               | dynamic light scattering                                                 |
| DMAP          | 4-dimethylaminopyridine                                       | DMEM              | Dulbecco's modified Eagle's medium                                       |
| DMF           | N,N-dimethylformamide                                         | DMSO              | dimethyl sulfoxide                                                       |
| DPPC          | 1,2-dipalmitoyl-sn-glycero-3-phosphocholine                   | DSPC              | 1,2-dioctadecanoyl-sn-glycero-3-phosphocholine                           |
| ECM           | Extracellular matrix                                          | EDCI              | N-(3-(dimethylamino)-propyl)-N-ethylcarbodiimide hydrochloride           |
| EE%           | encapsulation efficiency                                      | ELISA             | enzyme-linked immunosorbent assay                                        |
| ELJNV         | LYand JQ1 co-loaded enzyme-sensitive nanovesicles             | ELNV/LNV          | LY-loaded enzyme-sensitive nanovesicles/their enzyme-insensitive analogs |
| Em            | Emission                                                      | ENV               | ELNV nanovesicles without LY                                             |
| Ex            | Excitation                                                    | FAP               | fibroblast activation protein                                            |
| FBS           | fetal bovine serum                                            | FI                | Fluorescence imaging                                                     |
| Fmoc-GP       | Fmoc-protected heptapeptide                                   | GdCl <sub>3</sub> | Gadolinium chloride                                                      |
| LGLAG         | Gly-Pro-Leu-Gly-Leu-Ala-Gly                                   | HOBT              | 1-hydroxybenzotriazole                                                   |
| HMGB1         | high mobility group protein B1                                | H&E               | Hematoxylin and eosin                                                    |
| HPLC          | High-performance liquid chromatography                        | ICD               | immunogenic cell death                                                   |
| ICB           | immune-checkpoint blockade                                    | IDO               | indoleamine 2,3-dioxygenase                                              |
| ICP-MS        | inductively coupled plasma mass spectrometry                  | IF                | immunofluorescence                                                       |
| IETs          | Immune-excluded tumors                                        | IHC-P             | Immunohistochemistry (Paraffin)                                          |
| IFN- $\gamma$ | interferon-gamma                                              | i.t.              | intratumoral injection                                                   |
| Int.          | intensity                                                     | i.v.              | tail vein injection                                                      |
| ITM           | immunosuppressive tumor microenvironment                      | JP                | JQ1- triethylene glycol (Tg)-pPC                                         |
| JAK/STAT      | Janus kinase/signal transducer and activator of transcription |                   |                                                                          |

|                                         |                                                                                                                              |                             |                                                |
|-----------------------------------------|------------------------------------------------------------------------------------------------------------------------------|-----------------------------|------------------------------------------------|
| JQ1                                     | (S)-tert-butyl<br>2-(4-(4-chlorophenyl)-2,3,9-trimethyl-6H-thieno[3,2-f][1,<br>2,4]triazolo[4,3-a][1,4]diazepin-6-yl)acetate | JTP                         | JQ1-thioketal (TK)-pPC                         |
| LC-MS                                   | liquid chromatograph mass spectrometer                                                                                       | LJNV                        | enzyme-insensitive<br>nanovesicles JNV with LY |
| LNs                                     | lymph nodes                                                                                                                  | LNV                         | enzyme-insensitive<br>nanovesicles             |
| LR-ESI-<br>MS                           | Low-resolution electrospray ionization mass spectrometry                                                                     | LY                          | LY2157299                                      |
| MALDI-T<br>OF MS                        | matrix-assisted laser desorption/ionization time-of-flight<br>mass spectrometry                                              | MMP-2                       | Matrix metalloproteinase-2                     |
| mPEG <sub>5k</sub> -<br>NH <sub>2</sub> | Methoxypoly(ethylene glycol) amine                                                                                           | MRI                         | magnetic resonance imaging                     |
| MSOT                                    | multispectral optoacoustic tomography                                                                                        | MWCO                        | Molecular Weight Cut Off                       |
| NMR                                     | nuclear magnetic resonance                                                                                                   | O.C.T.                      | Optimal Cutting Temperature                    |
| PAI                                     | photoacoustic imaging                                                                                                        | PDAC                        | pancreatic ductal<br>adenocarcinoma            |
| PD-L1                                   | programmed death ligand 1                                                                                                    | PDI                         | Polydispersity Index                           |
| PDT                                     | Photodynamic therapy                                                                                                         | PEG                         | poly(ethylene glycol)                          |
| p-lysoPC                                | 1-palmitoyl-2-hydroxy-sn-glycero-3-phosphocholine                                                                            | PPa                         | Pyropheophorbide a                             |
| pSmad2/3                                | phospho-small mothers against decapentaplegic 2/3                                                                            | ROS                         | reactive oxygen species                        |
| RT                                      | room time                                                                                                                    | s.c.                        | subcutaneously injection                       |
| SDS                                     | sodium dodecyl sulfate                                                                                                       | SOSG                        | sodium dodecyl sulfate                         |
| TCGA                                    | The Cancer Genome Atlas                                                                                                      | TEA                         | triethylamine                                  |
| TEM                                     | Transmission electron microscopy                                                                                             | TFA                         | trifluoroacetic acid                           |
| TGF-β                                   | Transforming growth factor-β                                                                                                 | TGFR1                       | TGF-β receptor 1                               |
| TGFRs                                   | TGF-β receptors                                                                                                              | TIC                         | total ions chromatogram                        |
| TIL                                     | tumor-infiltrating lymphocyte                                                                                                | TPM                         | Transcripts Per Kilobase<br>Million            |
| TNBC                                    | triple-negative breast cancer                                                                                                | Tregs                       | regulatory T cells                             |
| t <sub>1/2β</sub>                       | blood-elimination half-life                                                                                                  | v                           | Volume                                         |
| WB                                      | Western blot                                                                                                                 | <sup>1</sup> O <sub>2</sub> | singlet oxygen                                 |

525

526 **Supplementary Table 2.** PPa encapsulation efficiency and loading ratio of ENV and ELNV nanovesicles (mean ±  
527 SD, n = 3 independent experiments).

|                          | ENV         | ELNV        |
|--------------------------|-------------|-------------|
| Encapsulation efficiency | 99.5 ± 0.2% | 98.4 ± 0.9% |
| Loading ratio            | 2.1 ± 0.5%  | 1.9 ± 0.3%  |

528

529 **Supplementary Table 3.** The Gd<sup>3+</sup>encapsulation efficiency and loading ratio of ENV and ELNV nanovesicles  
 530 (mean  $\pm$  SD, n = 3 independent experiments).

|                          | ENV             | ELNV            |
|--------------------------|-----------------|-----------------|
| Encapsulation efficiency | 18.4 $\pm$ 0.4% | 17.9 $\pm$ 0.4% |
| Loading ratio            | 1.9 $\pm$ 0.1%  | 1.7 $\pm$ 0.1%  |

531

532 **Supplementary Table S4.** Pharmacokinetic profiles of PPa, LY, LNV, and ELNV in BALB/c mice (mean  $\pm$  SD, n  
 533 = 3 mice).

|                                        | LY              |                   |                   | PPa             |                   |                    |
|----------------------------------------|-----------------|-------------------|-------------------|-----------------|-------------------|--------------------|
|                                        | Free LY         | LNV               | ELNV              | Free PPa        | LNV               | ELNV               |
| AUC <sub>(0-t)</sub><br>(mg/L*h)       | 14.17 $\pm$ 0.6 | 420.83 $\pm$ 26.7 | 436.02 $\pm$ 9.12 | 14.33 $\pm$ 0.6 | 182.4 $\pm$ 56.84 | 202.81 $\pm$ 16.25 |
| MRT <sub>(0-t)</sub> (h)               | 1.24 $\pm$ 0.06 | 12.39 $\pm$ 0.47  | 12.51 $\pm$ 0.46  | 0.95 $\pm$ 0.09 | 9.16 $\pm$ 1.45   | 9.82 $\pm$ 1.3     |
| t <sub>1/2<math>\beta</math></sub> (h) | 1.63 $\pm$ 0.2  | 16.62 $\pm$ 1.41  | 17.36 $\pm$ 2.0   | 0.86 $\pm$ 0.2  | 9.8 $\pm$ 0.61    | 12.48 $\pm$ 3.02   |

534 AUC: area under the time-concentration curve; MRT: mean residence time; t<sub>1/2 $\beta$</sub> : blood-elimination half-life.

535

536

537 **Supplementary Table 5.** The LY encapsulation efficiency and loading ratio of ELNV and ELJNV nanovesicles  
 538 (mean  $\pm$  SD, n = 3 independent experiments).

|                          | ELNV            | ELJNV           |
|--------------------------|-----------------|-----------------|
| Encapsulation efficiency | 94.0 $\pm$ 1.2% | 95.7 $\pm$ 0.5% |
| Loading ratio            | 19.1 $\pm$ 0.3% | 18.8 $\pm$ 2.1% |

539

540

541 **Supplementary Methods**

542 **Antibodies used for flow cytometry, western blot, immunofluorescence and**  
543 **immunohistochemistry analysis**

544 Anti-alpha smooth muscle actin antibody [EPR5368] (ab124964) for immunohistochemistry  
545 (IHC-P, 1:1000)/immunofluorescence (IF, 1:250)/Western Blot (WB, 1:10000), anti-CD3 antibody  
546 [SP162] (ab135372) for IHC-P (1:150), anti-CD31 antibody [RM1006] (ab281583, 1:50) for IHC-Fr,  
547 anti-Calreticulin antibody [EPR3924] - ER Marker (ab92516) for flow cytometry (1:50) and IF  
548 (1:300), anti-HMGB1 antibody (ab18256) for IF (1 µg/mL) were purchased from Abcam (UK).  
549 Recombinant mouse TGF-β1 (HEK293 expressed, HY-P7117) was obtained from MedChemExpress  
550 (MCE, Shanghai, China). Recombinant anti-Smad2 (phospho S467) antibody [EPR23681-40]  
551 (ab280888, 1:1000), recombinant anti-Smad2 antibody [EP567Y] (ab33875, 1:1000), anti-Smad3  
552 antibody (ab84177, 1:500), recombinant anti-Smad3 (phospho S423 + S425) antibody [EP823Y]  
553 (ab52903, 1:2000) for WB or IHC-P (1:100) were obtained from Abcam (UK). Recombinant  
554 anti-collagen I antibody [EPR24331-53] (ab270993, 1:500), goat Anti-Rabbit IgG H&L (Alexa  
555 Fluor® 488) (ab150077, 1:500) and goat anti-rabbit IgG H&L (Alexa Fluor® 555) (ab150078, 1:500)  
556 for IHC-P were purchased from Abcam. Anti-fibronectin antibody (ab2413) for IHC-P (1:100) and  
557 WB (1:50) was obtained from Abcam. Anti-fibroblast activation protein alpha antibody  
558 (NB110-85534) for WB (1:1000) was obtained from Novus Biologicals. Anti-fibroblast activation  
559 protein, alpha antibody (ab218164) for IHC-P (1:200) was obtained from Abcam. Anti-CD4 antibody  
560 [EPR19514] (ab183685, 1:1000), anti-CD8 alpha antibody [EPR21769] (ab217344, 1:2000) and  
561 Anti-PD-L1 antibody (ab233482, 10 µg/mL) for IHC-P were obtained from Abcam.  
562 Anti-CD3-PerCP-Cy5.5 (551163), anti-CD45-APC (559864), anti-CD45-PerCP-Cy5.5 (550994),

563 anti-CD8-PE (553033), anti-CD4-FITC (553046), anti-IFN- $\gamma$ -FITC (554411), anti-Foxp3-PE  
564 (560414), anti-CD11c-FITC (557400), anti-CD80-PE (553769), anti-CD86-APC (558703),  
565 anti-CD274-APC (564715) and anti-CD274-PE (558091) for flow cytometry (1:100) were all  
566 purchased from BD Biosciences (Shanghai). Anti-CD45-FITC (BD, 553079),  
567 anti-CD3-PerCP-Cy5.5 (BioLegend, 100218), anti-CD4-APC/Cy7 (BD, 552051), anti-CD8-PE (BD,  
568 553032), anti-IFN- $\gamma$ -APC (BD, 554413), anti-CD25-APC (Invitrogen, 17-0257-42), anti-Foxp3-PE  
569 (Invitrogen, 72-5775-40), anti-CD45-PE (Multi Sciences, F2104502), anti-CD8-PE/Texas red  
570 (Abcam, ab25294), anti-CD44-APC (BD, 559250), anti-CD62L-FITC (BioLegend, 104405) and  
571 anti-CD326 (Ep-CAM)-PE antibody (BioLegend, 118205) were used for flow cytometry (1:100).  
572 Anti-CD163 antibody [EPR19518] (ab182422, 1:800), anti-CD68 antibody (Cell Signaling  
573 Technology, 97778, 1:400), anti-CD86 antibody (Cell Signaling Technology, 19589, 1:100) and  
574 anti-MMP2 antibody (ab86607, 2  $\mu$ g/mL) for IHC-Fr or IHC-P were purchased from Abcam. All  
575 other reagents and solvents were analytical grade and obtained from SinoPharm Chemical Reagent  
576 Co., Ltd. (Shanghai, China).

#### 577 **Synthesis of PPa-PEG<sub>5k</sub>**

578 63.84 mg of PPa (0.12 mmol), 34.42 mg of EDCI (0.18 mmol), 24.35 mg of HOBT (0.18 mmol),  
579 and 21.96 mg of DMAP (0.18 mmol) were dissolved in 5.0 mL DMF and stirred for 1.5 h with an ice  
580 bath to active the carboxyl group. Then 500 mg of mPEG-NH<sub>2</sub> (0.1 mmol) was dissolved in 15 mL  
581 DMF, slowly dripped into the above solution, and stirred for another 24 h at room temperature (RT).  
582 Then dialyzed with deionized water (MWCO = 3500 Da) for 24 h and vacuum dried to obtain white  
583 powder (379.5 mg, 69.0%). <sup>1</sup>H-NMR (500 MHz, CDCl<sub>3</sub>)  $\delta$  = 3.40 (s, 3 H), 3.45-3.85 (m, 466 H),  
584 9.35 (s, 1 H), 9.48 (s, 1 H). *M<sub>w</sub>* (MALDI-TOF): 5500 Da.

585 **Synthesis of GPLGLAG-PEG<sub>5k</sub>**

586 149.6 mg of Fmoc-GPLGLAG (0.2 mmol), 114.1 mg of HATU (0.3 mmol), and 38.76 mg of DIEA  
587 were dissolved in 5.0 mL DMF and stirred for 1.5 h under an ice bath to activate the carboxyl group.  
588 Then 500 mg of mPEG-NH<sub>2</sub> (0.1 mmol) was dissolved in 15 mL DMF, slowly dripped into the  
589 above solution, and stirred for 24 h at RT. Use a syringe to add 6 mL of TEA to the above reaction  
590 solution, continue stirring to remove Fmoc, and then use deionized water dialyzing (MWCO = 3500  
591 Da) for 24 h. GPLGLAG-PEG was obtained as a white powder (386.6 mg, 68.3%) by lyophilization.  
592 <sup>1</sup>H-NMR (500 MHz, CDCl<sub>3</sub>) δ = 0.88 (m, 12 H), 3.45-3.85 (m, 460 H). *M<sub>w</sub>* (MALDI-TOF): 5660 Da.

593 **Synthesis of JQ1-COOH**

594 JQ1 (300 mg, 0.66 mmol) was dissolved in 10.0 mL reaction solvent of TFA and DCM (the volume  
595 ratio is TFA: DCM=1:1) and stirred for 4 h at RT. The solution was vacuum condensed. After  
596 isolation by silica gel column chromatography, JQ1-COOH was obtained as a light yellow powder  
597 (316.7 mg, yield 93.2%). <sup>1</sup>H-NMR (400 MHz, CDCl<sub>3</sub>) δ = 1.70 (s, 3H), 2.42 (s, 3H), 2.71 (s, 3H),  
598 3.57-3.74 (m, 2H), 4.59-4.62 (t, 1H), 7.33-7.44 (d, 4H). ESI (electrospray ionization) MS: *m/z* =  
599 401.05 [M + H]<sup>+</sup>.

600 **Synthesis of JQ1-thioketal (TK)**

601 JQ1-COOH (250 mg, 0.625 mmol), EDCI (359 mg, 1.9 mmol), and DMAP (229 mg, 1.9 mmol)  
602 were dissolved in 2.0 mL of anhydrous DCM and stirred for 2 h at 0 °C to activate the carboxyl  
603 group. After that, 2,2-bis-(2-hydroxy-ethylsulfanyl)-propane (306 mg, 1.55 mmol) was rapidly added  
604 to the mixture solution and stirred for 24 h at RT. JQ1-TK was obtained after isolation by silica gel  
605 column chromatography as a light yellow powder (252 mg, yield 70.0 %). <sup>1</sup>H-NMR (400 MHz,  
606 MeOD) δ = 1.62 (s, 6H), 1.70 (s, 3H), 2.49 (s, 3H), 2.67 (s, 3H), 2.71-2.79 (t, 2H), 2.98-3.01 (m,

607 2H), 3.53-3.62 (m, 2H), 3.68-3.74 (m, 2H), 4.36-4.51 (m, 2H), 4.61-4.65 (t, 1H), 7.33-7.43 (d, 4H),  
608 ESI-MS:  $m/z = 601.2 [M + Na]^+$ .

### 609 **Synthesis of pPC-COOH**

610 Succinic anhydride (120 mg, 1.2 mM), p-lysoPC (300 mg, 0.6 mM), and DMAP (150 mg, 1.2 mM)  
611 were dissolved in 2.0 mL anhydrous DCM and stirred for 48 h at 40 °C with N<sub>2</sub> protection. The  
612 solution was vacuum condensed. The raw product was purified by silica chromatography using an  
613 octadecyl (C18) column and methanol as the eluent to obtain pPC-COOH as a white powder (289.7  
614 mg, yield 80.5%). <sup>1</sup>H-NMR (400 MHz, CDCl<sub>3</sub>)  $\delta = 0.86-0.90$  (t, 3H), 1.25 (m, 24H), 1.56-1.60 (t,  
615 2H), 2.27-2.31 (t, 2H), 2.42-2.47 (m, 2H), 2.64-2.67 (d, 2H), 3.27 (s, 9H), 3.76 (s, 2H), 3.96-4.16 (m,  
616 4H), 4.25-4.28 (m, 2H), 5.26 (s, 1H). ESI-MS:  $m/z = 596.4 [M + H]^+$ .

### 617 **Synthesis of PPa-GPLGLAG-PEG<sub>5k</sub>**

618 To synthesize PPa-GPLGLAG-PEG<sub>5k</sub>, 15.3 mg of  
619 N-(3-(dimethylamino)-propyl)-N-ethylcarbodiimide hydrochloride (EDCI) (0.08 mmol), 10.81 mg of  
620 1-hydroxybenzotriazole anhydrous (HOBT) (0.08 mmol), and 21.65 mg of PPa (0.04 mmol) were  
621 dissolved in 3 mL of anhydrous N,N-dimethylformamide (DMF) and stirred for 1.5 h at 0 °C to  
622 activate the carboxyl group of PPa under dark. Then 160 mg of the synthesized GPLGLAG-PEG<sub>5k</sub>  
623 (0.03 mmol) was dissolved in 6 mL DMF, slowly dripped into the above reaction solution, followed  
624 by stirring for 24 h at room temperature (RT), and then dialyzed with 95% ethanol for 24 h and  
625 deionized water (Molecular Weight Cut Off [MWCO] = 3500 Da) for 4 hours and vacuum dried to  
626 obtain a pale yellow solid powder (122.7 mg, 70.1%). <sup>1</sup>H-NMR (500 MHz, CDCl<sub>3</sub>)  $\delta = 0.89$  (m,  
627 12H), 3.40 (s, 3 H), 3.45-3.85 (m, 466 H), 9.35 (s, 1 H), 9.48 (s, 1 H). *M<sub>w</sub>* (MALDI-TOF): 6200 Da.

### 628 **Synthesis of ROS-sensitive JQ1-TK-pPC (JTP) and ROS-insensitive JQ1-pPC (JP)**



629 To synthesize JTP, pPC-COOH (256 mg, 0.43 mmol), 4-dimethylaminopyridine (DMAP) (157 mg,  
630 1.29 mmol), EDCI (247.1 mg, 1.29 mmol), N,N-Diisopropylethylamine (DIEA) (225  $\mu$ L, 1.29 mmol)  
631 were dissolved in 4 mL of anhydrous dichloromethane (DCM) and stirred for 2 h at 0  $^{\circ}$ C to activate  
632 the carboxyl group. Then JQ1-TK (300 mg, 0.52 mmol) in anhydrous DCM was slowly added into  
633 the above mixture and stirred for 48 h at RT. The solution was vacuum condensed and precipitation  
634 by cold diethyl ether to obtain purified JTP (357.8 mg, yield 72.1%).  $^1$ H-NMR (400 MHz,  $\text{CDCl}_3$ )  $\delta$   
635 = 0.86-0.89 (t, 3H), 1.25 (m, 24H), 1.70 (s, 2H), 2.41-2.48 (s, 3H), 3.68-3.74 (m, 2H), 4.22-4.41 (t,  
636 4H), 4.61-4.65 (t, 1H), 7.33-7.43 (d, 4H). ESI (electrospray ionization) -MS:  $m/z$  = 1156.6  $[\text{M} + \text{H}]^+$ .

637 To synthesize ROS-insensitive JP, JQ1-COOH (200 mg, 0.5 mmol), EDCI (288 mg, 1.5 mmol),  
638 DMAP (183 mg, 1.5 mmol), DIEA (194 mg, 1.5 mmol) was dissolved in 2.0 mL of anhydrous DCM  
639 and stirred for 2 h at 0  $^{\circ}$ C to activate the carboxyl group. After that, triethylene glycol (Tg, 225 mg,  
640 1.5 mmol) was rapidly added to the mixture solution and stirred for 24 h at RT. JQ1-Tg was obtained  
641 after isolation by silica gel column chromatography (226 mg, yield 84.8 %).  $^1$ H-NMR (400 MHz,  
642 MeOD)  $\delta$  = 1.70 (s, 3H), 2.41 (s, 3H), 2.69 (s, 3H), 3.63-3.67 (m, 2H), 3.69-3.81 (m, 12H), 4.62-4.67  
643 (t, 1H), 7.33-7.38 (m, 2H), 7.40-7.46 (m, 2H), API-ESI-LC-MS:  $m/z$  = 533.2  $[\text{M} + \text{H}]^+$ . Then,  
644 pPC-COOH (50.0 mg, 0.084 mmol), 4-dimethylaminopyridine (DMAP) (37.8 mg, 0.252 mmol),  
645 EDCI (48.3 mg, 0.252 mmol), N,N-Diisopropylethylamine (DIEA) (32.5 mg, 0.252 mmol) was  
646 dissolved in 2 mL of anhydrous dichloromethane (DCM) and stirred for 2 h at 0  $^{\circ}$ C to activate the  
647 carboxyl group. Then JQ1-Tg (53.8 mg, 0.101 mmol) in anhydrous DCM was slowly added into the  
648 above mixture and stirred for 48 h at RT. The solution was vacuum condensed and was further  
649 purified via C18 silica gel column chromatography to obtain JP (22.4 mg, yield 24.0%). ESI-MS:  
650  $m/z$  = 1110.5  $[\text{M} + \text{H}]^+$ .

651 **MMP-2 cleavage activity of PPa-GPLGLAG-PEG<sub>5k</sub>**

652 PPa-GPLGLAG-PEG<sub>5k</sub> (1.0 mg/mL) and MMP-2 (40 µg/mL) in 20 mM Tris buffer (100 mM CaCl<sub>2</sub>,  
653 50 mM NaCl, 0.05% Brij35, pH 7.4) were mixed and incubated at 37 °C for 0, 5, 20, 40, 60 min. The  
654 assay was monitored using HPLC (Waters e2695, C18 column, 5 µm, 4.6×250 mm) with 60%-100%  
655 MeOH (0-4 min) and 100% MeOH (4-10 min) elution. And the molecular weights of the MMP-2  
656 degradation solution were measured by MALDI-TOF MS.

657 **ROS cleavage activity of JQ1-TK-pPC**

658 JQ1-TK-pPC and PEG<sub>5k</sub>-PPa were dissolved in 200 µL of methanol at an identical concentration of  
659 1.0 mg/mL in 96-well plate, followed by 671 nm laser irradiation (150 mW/cm<sup>2</sup>) for 0.5, 1, 2 or 5  
660 min under dark. Afterward, LC-MS was used to examine the ROS responsiveness of pPC-TK-JQ1  
661 (elution phase: methanol/water (9/1, v/v); Flow rate: 0.5 mL/min).

662 **Fabrication and characterization of the Gd<sup>3+</sup>-loaded ELNV nanovesicles**

663 The filming-rehydration method was used to fabricate the prodrug nanovesicles<sup>1</sup>. To prepare  
664 Gd<sup>3+</sup>-loaded ELNV or LNV nanovesicles, an aqueous solution of gadolinium chloride (GdCl<sub>3</sub>) was  
665 added to the methanol solution of PPa-GPLGLAG-PEG<sub>5k</sub> or PPa-PEG<sub>5k</sub> at a Gd<sup>3+</sup> to PPa molar ratio  
666 of 5:1. The solution was incubated overnight at room temperature to load Gd<sup>3+</sup> into PPa. The  
667 methanol solution was dropwise added to 1.0 mL of DI water under sonication. The excess Gd<sup>3+</sup> and  
668 organic solvent were removed by dialyzing against DI water. The Gd<sup>3+</sup> concentration in the resultant  
669 nanovesicles was determined using inductively coupled plasma mass spectrometry (ICP-MS)  
670 measurements.

671 **Fluorescence properties of ELNV and LNV nanovesicles**

672 To evaluate aggregation-caused quenching of the fluorescence properties of ELNV, the prepared

673 ELNV nanovesicles with different PPa concentrations of 0, 3.125, 6.25, 12.5, 25, 50, and 100  $\mu\text{M}$   
674 were dissolved in 10% SDS and PBS. The fluorescence intensity of different solutions was detected  
675 by the microplate reader (Ex/Em = 410 nm/670 nm). the ELNV (with different PPa concentrations)  
676 in 10% SDS and PBS were further imaged with the IVIS-Imaging System (Ex/Em = 670 nm/690  
677 nm).

#### 678 **Colloid stability of ELNV**

679 To examine the serum stability of the prodrug vesicles, ELNV was incubated in PBS with 10% FBS  
680 at 37 °C, and the size of ELNV nanovesicles was monitored at 1, 2, 4, 6, 8, 12, and 24 h by DLS. To  
681 examine the long-term stability, ELNV in PBS with 10% FBS was placed at 4 °C and the size of  
682 ELNV nanovesicles was monitored at 1, 2, 3, 4, 5, and 6 d by DLS.

#### 683 **De-PEGylation of ELNV**

684 The ELNV nanovesicles were incubated with different concentrations of MMP-2 (0  $\mu\text{g}/\text{mL}$ , 25  
685  $\mu\text{g}/\text{mL}$ , 250  $\mu\text{g}/\text{mL}$ , and 500  $\mu\text{g}/\text{mL}$ ) and the intensity size and PDI change of ELNV nanovesicles  
686 were detected at incubation times of 0, 10, 20, 30, 40, 50, 60, 100 and 150 min by DLS.

#### 687 **LY and PPa release from ELNV**

688 The LY release profile of ELNV and LNV were evaluated by HPLC. Briefly, the ELNV and LNV  
689 prodrug nanovesicles were incubated with or without 40  $\mu\text{g}/\text{mL}$  of MMP-2 at 37 °C. LY released  
690 from the nanovesicles was then monitored using HPLC with 70% acetonitrile elution at different  
691 times.

692 To investigate PPa release from the nanovesicles, 1 mL of ENV and ELNV suspension (100  $\mu\text{g}/\text{mL}$   
693 PPa) were added in dialysis tubes (MWCO = 3500 Da), respectively. 10 mL of 40  $\mu\text{g}/\text{mL}$  MMP-2  
694 was added outside the dialysis bags. Samples were taken out on different time points from 0 to 24 h.

695 PPa release from the nanovesicles into the solution was measured using a fluorescence  
696 spectrophotometer.

### 697 **Cellular uptake**

698 To investigate cellular uptake profile of the nanovesicles *in vitro*, 4T1 cells were incubated in 24-well  
699 tissue culture plate ( $6 \times 10^4$  cells/well) for 24 h. The cells were cultured with PBS, free PPa, ELNV,  
700 ELNV + MMP-2, LNV, and LNV + MMP-2 (the concentration of MMP-2 was 40  $\mu\text{g}/\text{mL}$ ) at the  
701 identical PPa concentration of 5.0  $\mu\text{M}$  for 1, 2, 4, and 12 h, respectively. Then 4T1 cells were  
702 collected and examined by flow cytometry (BD FACS Calibur, BD, USA). To observe the cellular  
703 uptake of the nanovesicles more intuitively *in vitro*, 4T1 cells were incubated in 24-well plates  
704 ( $3 \times 10^4$  cells/well) for 24 h and then cultured with LNV, LNV + MMP-2, ELNV, and ELNV +  
705 MMP-2 (the nanovesicles were treated with 40  $\mu\text{g}/\text{mL}$  MMP-2 for 60 min before adding to the cells)  
706 for 4 h. Afterwards, the cells were stained with DAPI and lysotracker green and examined by CLSM.

### 707 **Photoactivity of the nanovesicles *in vitro* and *in vivo***

708 To investigate laser-induced ROS generation of ELNV *in vitro*,  $5 \times 10^4$  4T1 cells in a 24-well plate  
709 were incubated with ELNV (PPa concentrations of 2.5  $\mu\text{M}$  and 5  $\mu\text{M}$ ) for 4 h. After that, the cells  
710 were washed with PBS and added with 10  $\mu\text{M}$  of 2',7'-dichlorofluorescein diacetate (DCFH-DA) for  
711 30 min. The cells were irradiated with 671 nm laser for 1 min to generate ROS. The cells were  
712 collected and washed with PBS for FACS analysis. ELNV was pretreated with 40  $\mu\text{g}/\text{mL}$  of MMP-2  
713 for 24 h before adding to the cells.

714 To study the photoactivity *in vitro*, the cells were treated with PBS, free PPa, LNV, LNV + MMP-2,  
715 ELNV, ELNV + MMP-2, or ELNV + MMP-2 + Vc for 4 h (5  $\mu\text{M}$  of PPa and 5 mM of Vc). After  
716 that, the cell samples were washed 3 times with 4 °C PBS. Then, 10  $\mu\text{M}$  DCFH-DA was added to

717 each well and the DCFH-DA was incubated for a total of 30 min, followed by 671 nm laser  
718 irradiation for 1 min at 150 mW/cm<sup>2</sup> to generate ROS. The cells were collected and washed with  
719 PBS for FACS analysis. The MMP-2 group was pretreated with 40 µg/mL MMP-2 for 24 h before  
720 adding to the cells.

721 To analyze ROS generation by ELNV and ENV, 4T1 cells were incubated on a coverslip placed in 24  
722 well plates at a density of 3×10<sup>4</sup> cells/well for 24 h and then cultured with LNV and ELNV (5 µM of  
723 PPa) for 4 h. LNV and ELNV were treated with 40 µg/mL MMP-2 for 60 min before adding to the  
724 cells. Then the cells were washed twice and stained with ready-used 4',6-diamidino-2-phenylindole  
725 dihydrochloride (DAPI) for 10 min. After that, the cells were washed with PBS 3 times. Then, 10  
726 µM DCFH-DA was added and irradiated with 671 nm laser for 1 min at 150 mW/cm<sup>2</sup> to generate  
727 ROS. The cells were collected and washed with PBS for CLSM analysis.

728 To detect ROS generation *in vivo*, the subcutaneous 4T1 tumor models were established in BALB/c  
729 mice by subcutaneously inoculating 1 × 10<sup>7</sup> tumor cells/mouse. The tumor-bearing mice were  
730 randomly grouped (n = 3) when the tumor volume reached 150 mm<sup>3</sup>. 4T1 tumor-bearing BALB/c  
731 mice were with i.v. injected with PBS, ENV or ELNV at the identical PPa dose of 5 mg/kg and LY  
732 dose of 20 mg/kg. After 8 h, 20 µL 1 mM DCFH-DA was injected intratumorally. The tumor tissues  
733 were irradiated with a 671 nm laser for 1 min (400 mW/cm<sup>2</sup>) half an hour post-injection. After 12 h  
734 of the end of the irradiation, the mice were sacrificed and the tumor tissues were frozen sectioned  
735 and analyzed ROS generation by CLSM.

### 736 **Immunofluorescence staining of macrophages**

737 To further determine whether LY can polarize TAM into M1 phenotype, 4T1 tumor-bearing mice  
738 were intratumor injected with LY (0.75 or 1.5 mg/kg, n = 3) every other day. After one week, all  
739 mice were sacrificed and the tumors were sampled, immunofluorescence staining of the

740 tumor-infiltrating M1/M2 macrophages was subsequently performed on the tumor sections. We  
741 measured the percentage of M1 and M2 macrophages to the total macrophages in tumor tissues by  
742 ImageJ.

743

744

#### 745 **Supplementary References**

- 746 1. Zhou F, et al. Overcoming immune resistance by sequential prodrug nanovesicles for promoting  
747 chemoimmunotherapy of cancer. *Nano Today* **36**, 101025 (2021).
- 748 2. Áron B, et al. TNMplot.com: A Web Tool for the Comparison of Gene Expression in Normal,  
749 Tumor and Metastatic Tissues. *Int. J. Mol. Sci.* **22**(5), 2622 (2021).
